# Supplementary material for: Impact of electronic palliative care coordination systems (EPaCCS) on care at the end of life across multiple care sectors, in one clinical commissioning group area, in England: a realist evaluation protocol
Source: PubMed Central journal article supplement (PMC7170566; doi:10.1136/bmjopen-2019-031153), 2020-03-31

# BMJ Open

BMJ Open is committed to open peer review. As part of this commitment we make the peer review history of every article we publish publicly available.

When an article is published we post the peer reviewers' comments and the authors' responses online. We also post the versions of the paper that were used during peer review. These are the versions that the peer review comments apply to.

The versions of the paper that follow are the versions that were submitted during the peer review process. They are not the versions of record or the final published versions. They should not be cited or distributed as the published version of this manuscript.

BMJ Open is an open access journal and the full, final, typeset and author-corrected version of record of the manuscript is available on our site with no access controls, subscription charges or pay-per-view fees (<http://bmjopen.bmj.com>).

If you have any questions on BMJ Open's open peer review process please email [info.bmjopen@bmj.com](mailto:info.bmjopen@bmj.com)

# BMJ Open

## THE IMPACT OF ELECTRONIC PALLIATIVE CARE COORDINATION SYSTEMS (EPaCCS) ON CARE AT THE END OF LIFE: A REALIST EVALUATION PROTOCOL

|                               |                                                                                                                                                                                                                                                                                                                                                                                              |
|-------------------------------|----------------------------------------------------------------------------------------------------------------------------------------------------------------------------------------------------------------------------------------------------------------------------------------------------------------------------------------------------------------------------------------------|
| Journal:                      | <i>BMJ Open</i>                                                                                                                                                                                                                                                                                                                                                                              |
| Manuscript ID                 | bmjopen-2019-031153                                                                                                                                                                                                                                                                                                                                                                          |
| Article Type:                 | Protocol                                                                                                                                                                                                                                                                                                                                                                                     |
| Date Submitted by the Author: | 07-May-2019                                                                                                                                                                                                                                                                                                                                                                                  |
| Complete List of Authors:     | Pocock, Lucy; University of Bristol, Centre for Academic Primary Care<br>French, Lydia; University of Bristol, Centre for Academic Primary Care<br>Farr, Michelle; University of Bristol, NIHR CLAHRC West, Bristol Medical School<br>Morris, Richard; University of Bristol, School of Social & Community Medicine<br>Purdy, Sarah; University of Bristol, Centre for Academic Primary Care |
| Keywords:                     | PALLIATIVE CARE, Quality in health care < HEALTH SERVICES ADMINISTRATION & MANAGEMENT, PRIMARY CARE, QUALITATIVE RESEARCH                                                                                                                                                                                                                                                                    |
|                               |                                                                                                                                                                                                                                                                                                                                                                                              |

SCHOLARONE™  
Manuscripts

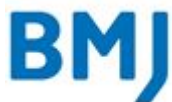

I, the Submitting Author has the right to grant and does grant on behalf of all authors of the Work (as defined in the below author licence), an exclusive licence and/or a non-exclusive licence for contributions from authors who are: i) UK Crown employees; ii) where BMJ has agreed a CC-BY licence shall apply, and/or iii) in accordance with the terms applicable for US Federal Government officers or employees acting as part of their official duties; on a worldwide, perpetual, irrevocable, royalty-free basis to BMJ Publishing Group Ltd ("BMJ") its licensees and where the relevant Journal is co-owned by BMJ to the co-owners of the Journal, to publish the Work in this journal and any other BMJ products and to exploit all rights, as set out in our [licence](#).

The Submitting Author accepts and understands that any supply made under these terms is made by BMJ to the Submitting Author unless you are acting as an employee on behalf of your employer or a postgraduate student of an affiliated institution which is paying any applicable article publishing charge ("APC") for Open Access articles. Where the Submitting Author wishes to make the Work available on an Open Access basis (and intends to pay the relevant APC), the terms of reuse of such Open Access shall be governed by a Creative Commons licence – details of these licences and which [Creative Commons](#) licence will apply to this Work are set out in our licence referred to above.

Other than as permitted in any relevant BMJ Author's Self Archiving Policies, I confirm this Work has not been accepted for publication elsewhere, is not being considered for publication elsewhere and does not duplicate material already published. I confirm all authors consent to publication of this Work and authorise the granting of this licence.

1  
2  
3 **THE IMPACT OF ELECTRONIC PALLIATIVE CARE COORDINATION**  
4  
5 **SYSTEMS (EPaCCS) ON CARE AT THE END OF LIFE: A REALIST**  
6  
7 **EVALUATION PROTOCOL**  
8  
9

10  
11  
12 **Corresponding author**  
13

14 Lucy V Pocock, Population Health Sciences, Bristol Medical School, University of Bristol,

15  
16 Canynge Hall, 39 Whatley Road, Bristol, BS8 2PS

17  
18 [Lucy.pocock@bristol.ac.uk](mailto:Lucy.pocock@bristol.ac.uk), Tel: 07810 002320  
19  
20  
21  
22

23  
24 **Co-authors**  
25

26 Lydia R M French, Population Health Sciences, Bristol Medical School, University of  
27  
28 Bristol, Bristol, UK

29  
30 Michelle Farr, The National Institute for Health Research Collaboration for Leadership in  
31  
32 Applied Health Research and Care West (NIHR CLAHRC West) at University Hospitals  
33  
34 Bristol NHS Foundation Trust, UK  
35  
36

37 Richard Morris, Population Health Sciences, Bristol Medical School, University of Bristol,  
38  
39 Bristol, UK  
40  
41

42 Sarah Purdy, Population Health Sciences, Bristol Medical School, University of Bristol,  
43  
44 Bristol, UK,  
45  
46  
47  
48

49 Word Count: 3862  
50  
51  
52  
53  
54  
55  
56  
57  
58  
59  
60

## Abstract

*Introduction:* Electronic palliative care coordination systems (EPaCCS) aim to support people approaching the end-of life to receive consistent care, according to their wishes, that is coordinated effectively across multiple care sectors. They are in use across the UK although empirical evidence into their effectiveness is poor. This paper presents a protocol of a mixed-methods study, to understand how, and by whom, EPaCCS are being used and whether EPaCCS are enabling Healthcare Professionals (HCPs) to coordinate patients' end-of-life (EOL) care.

*Methods and Analysis:* This is a mixed-methods study, carried out within a realist paradigm, to evaluate the impact of an EPaCCS on EOL care as provided by a Clinical Commissioning Group (CCG) in England. This study has two aims: 1. Describe the socio-demographic characteristics of patients who die with an EPaCCS record, their underlying cause of death and place of death and compare these with patients who die without an EPaCCS record. 2. Explore the impact of an EPaCCS on the experience of receiving EOL care for patients and their carers, and understand HCPs' views and experiences of utilising an EPaCCS to coordinate care for their patients. The study will be conducted in five phases: (1) development of the initial programme theory; (2) focus group with CCG stakeholder board; (3) individual interviews with HCPs, patients, current and bereaved carers; (4) retrospective cohort study of routinely collected data on EPaCCS usage and (5) data analysis and synthesis of study findings.

*Ethics and dissemination:* The study has been approved by NHS South West – Frenchay Research Ethics Committee (REC reference number: 18/SW/0198). Findings will be published in a wide range of outputs targeted at key audiences.

### *Strengths and limitations of this study*

- The study will clearly articulate the preliminary theories and assumptions about EPaCCS and how they are expected to work.
- The study will test and refine these theories throughout the study using existing empirical evidence, qualitative data collected from healthcare professionals, patients and carers, and routinely collected quantitative data.
- The study will investigate the impact of only one of the many EPaCCS developed and implemented in the UK.

### **Key words**

**Palliative Care, Quality in Health Care, Primary Care, Qualitative Research**

## Background

People at the end-of-life (taken here to mean in the last 12 months of life) frequently receive care from a wide variety of teams and organisations. Much of this care is accessed in the out-of-hours period (overnight and at the weekend), when they are unlikely to see a Healthcare Professional (HCP) who knows them well. Out-of-hours provision of palliative care (defined by NICE as “the active holistic care of patients with advanced, progressive illness” (1)) has been identified as a key priority for future research by the Palliative and End of Life Care Priority Setting Partnership, initiated in 2013 by Marie Curie (2). This process identified the top 10 unanswered research questions and the question with the highest priority was, “What are the best ways of providing palliative care outside of working hours to avoid crises and help patients to stay in their place of choice?”

Continuity of care is important for anyone with complex health and social care needs, but particularly for those at the end-of-life (EOL) (3). A lack of information sharing has been repeatedly cited as a barrier to the provision of good quality EOL care outside of normal working hours (4,5,6). Recent studies looking at the experiences and needs of people seeking palliative care out-of-hours found that most patients expect the HCP to be able to access a summary of their complex medical history and many voiced concerns that their full record could not be accessed by out-of-hours clinicians (5,7). For some patients, lack of access to their notes is a deterrent to accessing care out-of-hours (6).

Nationally, the policy drive to address the issue of information continuity has resulted in the development of Electronic Palliative Care Coordination Systems, or EPaCCS (5,8,9,10).

These records are usually completed by the patients’ GP or community nurse, including patients’ advance care wishes, and are accessible across multiple care sectors (10). The purpose of EPaCCS is to provide a shared local record for health and social care professionals, with key information about an individual approaching the EOL, including their

1  
2  
3 expressed preferences for care. In accordance with the Quality Statements in the NICE End  
4 of Life Care Standard for Adults (11) the intent is for EPaCCS to support people approaching  
5 the EOL to receive consistent care that is coordinated effectively across all relevant settings.  
6  
7

8  
9  
10 An EPaCCS record can take various forms, including web-based electronic registers, systems  
11 based on sharing care summaries or care plans, alongside patients' electronic records. They  
12 store a dynamic record of a patient's medical condition, treatment, wishes and preferences,  
13 and provide information about the medication a patient is receiving, contact details of any  
14 carers, and services involved in providing care and support to the patient.  
15  
16  
17

18  
19  
20 Sharing information about patients' EOL care improves coordination and communication  
21 across care settings (12). It reduces unnecessary and unplanned hospital admissions,  
22 ambulance journeys, inappropriate interventions and use of unscheduled care, limits the  
23 likelihood of HCPs and patients having to repeat 'difficult conversations' and enables a  
24 patient to die in their preferred place (13).  
25  
26  
27

28  
29  
30 It is now recognised that place of death is unlikely to be the most important factor in  
31 achieving a good death and a recent UK study has proposed that it is the presence of loved  
32 ones that is more important than the physical location (14). However, death in preferred place  
33 remains a significant measure of quality of death (15) and, according to the Voices survey of  
34 bereaved people, despite 81% of respondents believing that the deceased had wanted to die at  
35 home less than a quarter of people actually achieve this (16, 17).  
36  
37  
38

39  
40  
41 Quantitative studies have shown striking differences in place of death with EPaCCS but are  
42 potentially biased and confounded (12). A more recent study challenges these assumptions,  
43 suggesting that the increase in home deaths could in fact be due to selection bias (few  
44 secondary care colleagues used the systems and therefore hospital deaths are not captured)  
45 (10). The findings of this study also underscore the importance of qualitative approaches,  
46  
47  
48  
49  
50  
51  
52  
53  
54  
55  
56  
57  
58  
59  
60



1  
2  
3 which can offer crucial insights into what is happening on the ground, away from broad  
4 claims of EPaCCS benefits arrived at solely through quantitative methods. Without  
5  
6 understanding the experiences of patients and carers, together with the perspectives of HCPs,  
7  
8 it is difficult to evaluate the effectiveness of EPaCCS (18).  
9  
10

11  
12 Technology in isolation is not guaranteed to bring benefit and the initiation of an EPaCCS  
13  
14 relies on healthcare professionals initiating conversations about death and dying. There is  
15  
16 evidence that these conversations are difficult for HCPs (19), with many choosing to avoid  
17  
18 the conversation altogether (20). What impact EPaCCS has upon these conversations, if any,  
19  
20 is not clear.  
21  
22

23  
24 A recent independent evaluation of EPaCCS found that “it was not possible to demonstrate  
25  
26 that EPaCCS was making any difference to the care patients were receiving at the end-of-life  
27  
28 because the range of clients for whom EPaCCS was being used remains focused on cancer,  
29  
30 and the ability of EPaCCS systems to report on progress and outcomes remains generally  
31  
32 poor” (21).  
33  
34

35  
36 We therefore do not know if EPaCCS acts to improve practice or whether it simply  
37  
38 documents and reflects what is already taking place in practice (21). Indeed, the need to  
39  
40 gather evidence of effectiveness of EPaCCS before widespread and uncritical adoption by the  
41  
42 NHS is key.  
43  
44

45  
46 To summarise, very little research has been carried out to understand how, and by whom,  
47  
48 EPaCCS are being used and, perhaps more importantly, whether EPaCCS are enabling HCPs  
49  
50 to support patients’ EOL wishes. Rigorous evaluation and research are urgently needed to  
51  
52 investigate to what extent EPaCCS influence services working together to support ‘a good  
53  
54 death’, the outcome that stakeholders think is of most importance (22).  
55  
56  
57  
58  
59  
60

## **Aims, Objectives and Research Questions**

The study has two aims. These are to:

1. Describe the socio-demographic characteristics of patients who die with an EPaCCS record, their underlying cause of death and place of death and compare these with patients who die without an EPaCCS record.
2. Explore the impact of an EPaCCS on the experience of receiving EOL care for patients and their carers, and understand HCPs' views and experiences of utilising an EPaCCS to provide palliative care to their patients.

## **Project methodology**

### *Study setting*

This study will be implemented in England, where one Clinical Commissioning Group (CCG) has recently developed and rolled out an EPaCCS. This involved the dissemination of an EMIS template, which was circulated to General Practices, to help ensure consistent data entry and coding. EMIS is the most widely used primary care clinical system in the UK and allows real-time patient information to be shared securely between different organisations. All practices in the CCG area are EMIS users and it is now also used by the local hospice and many of the community nursing teams. It is not, however, used routinely by secondary care organisations, the ambulance service, or providers of social care.

The EPaCCS template was developed following extensive local clinical consultation and the National Information Standard (23). Information from this template went live across the local health community, via the integrated digital care record used by health and social care professionals in the CCG area, at the end of February 2018.

### *Conceptual framework*

1  
2  
3 This study will draw on a realist evaluation approach (24). A randomised, experimental study  
4 design is not possible as the implementation of EPaCCS has been strongly advocated and  
5 promoted by NHS England, with 83% of Clinical Commissioning Groups (CCGs) in England  
6 reported to have an operational EPaCCS, or be in the planning stages, by 2013 (25). The  
7 CCG had recently operationalised an EPaCCS at the time of study design.  
8  
9

10  
11  
12  
13  
14  
15 By their nature, EPaCCS involve multiple organisations and a multidisciplinary style of  
16 work. It therefore requires a novel methodological approach to evaluation as described in this  
17 protocol.  
18  
19

20  
21  
22  
23  
24  
25  
26  
27  
28  
29  
30  
31  
32  
33  
34  
35  
36  
37  
38  
39  
40  
41  
42  
43  
44  
45  
46  
47  
48  
49  
50  
51  
52  
53  
54  
55  
56  
57  
58  
59  
60

Realist evaluation is a theory-driven approach designed for evaluating complex interventions, such as EPaCCS, where the outcomes are influenced by the way the intervention is delivered and in what context. Due to this complexity, any evaluation of EPaCCS seeking to determine linear causal relationships or simply find out if the intervention “works” is unlikely to be useful. Pawson and Tilley (24), the developers of realistic evaluation, suggest that the results of an intervention (outcomes) are dependent on the introduction of appropriate reasoning and resources (mechanisms) and how these then interact with existing social and cultural condition (contexts). For the purposes of this study, we have defined context (C), mechanism (M) and outcome (O) in Figure 1.

### **Figure 1 – Definition of Context, Mechanism and Outcome**

A realist approach acknowledges that complex interventions only ever work for certain people, in particular circumstances. The key task of a realist evaluation is to understand and explain these patterns by asking the exploratory question: *what works, for whom and in what circumstances?*

According to Pawson, interventions or “programmes”, such as the EPaCCS, are ‘theories incarnate’ and every programme has a theoretical underpinning (27). Before conducting a

1  
2  
3 realist evaluation, the researchers must develop a theory, or theories, that explain what works,  
4  
5 for whom, under what circumstances and how. This is sometimes known as the “initial  
6  
7 programme theory” and is described through CMO conjectures. This theory, or theories, are  
8  
9 then tested through the process of the evaluation.  
10  
11

12  
13 The study will be conducted in five phases: (1) development of the initial programme theory;  
14  
15 (2) focus group with CCG stakeholder board; (3) individual interviews with healthcare  
16  
17 professionals (HCPs), patients, current and bereaved carers; (4) retrospective cohort study of  
18  
19 routinely collected data on EPaCCS usage and (5) data analysis and synthesis of study  
20  
21 findings.  
22  
23

### 24 25 26 27 ***Phase one: development of the initial programme theory*** 28

29  
30 Phase one is complete and included identification of relevant literature from electronic  
31  
32 searches of databases. Reference lists of relevant papers were scanned, and citation searches  
33  
34 conducted. Grey literature relating to policy and organisational-based material were sought  
35  
36 by searching government and other specialist websites. The lead researcher’s own  
37  
38 experiences as a General Practitioner (GP) were used as “informed guesswork” (28) and  
39  
40 initial meetings were held with key stakeholders, including patients at the local hospice and  
41  
42 commissioners. These initial engagements were informal and were patient and public  
43  
44 involvement activities (detailed further below). They did not constitute formal interviews  
45  
46 requiring ethics clearance.  
47  
48  
49

50  
51 At an early stage of the programme theory development, the CMO conjectures were reviewed  
52  
53 by, and discussed with, Dr Justin Jagosh, Director of the Centre for Advancement in Realist  
54  
55 Evaluation and Synthesis.  
56  
57  
58  
59  
60

1  
2  
3 The initial programme theory forms a set of hypotheses on what the mechanisms may be,  
4 what groups may benefit most or least and the contextual factors that might be important to  
5 its success or failure. These hypotheses will be interrogated and tested in phases 2-5 of the  
6 study.  
7  
8  
9  
10  
11  
12

13 **Figure 2 - Visual representation of the initial programme theory at a macro level.**  
14  
15  
16  
17

18 *Phase two: focus group with CCG stakeholder board*  
19

20  
21 The CCG EOL care board is a multi-disciplinary, multi-organisational system board, whose  
22 members are high-level stakeholder representatives from across the CCG, including  
23 representatives from community nursing teams, primary care, the ambulance service, local  
24 hospices, care homes and secondary care. The purpose of the board is to review the current  
25 commissioning across all geographical provision, ensuring unified pathways for community,  
26 primary and secondary providers to provide consistency for all patients, carers and staff  
27 across the system.  
28  
29  
30  
31  
32  
33  
34  
35  
36  
37

38 Board members will be invited to take part in a focus group following their attendance at the  
39 monthly board meeting. Focus groups allow for social interaction, which can help to reveal  
40 issues and subsequent points of view that may not be prompted or discovered through  
41 individual interviews. This approach will help the study team to gain as wide an  
42 understanding as possible of the process of commissioning the EPaCCS and help to refine the  
43 initial programme theory.  
44  
45  
46  
47  
48  
49  
50  
51

52 Participants will be consented to take part in the study prior to the focus group by either LF or  
53 LP who will be facilitating. A topic guide will be used to steer the focus group and will  
54 enable the research team to test and refine the initial programme theory prior to commencing  
55 the in-depth interviews (see table 1).  
56  
57  
58  
59  
60

It is anticipated that the focus group will last approximately 45 minutes and that approximately 5-10 participants will take part in it. The focus group will be audio taped and transcribed verbatim.

**Table 1: Programme theory for the EPaCCs study, comprising the 17 context, mechanism and outcome (CMO) statements that inform the programme theory, and the questions that will be used, in the focus group with the end-of-life Board, to investigate each CMO statement.**

| EPaCCs Process                | CMOs                                                                                                                                                                                                                                     | Focus group questions                                                                                                                                                                                                                                                                                                                                                           |
|-------------------------------|------------------------------------------------------------------------------------------------------------------------------------------------------------------------------------------------------------------------------------------|---------------------------------------------------------------------------------------------------------------------------------------------------------------------------------------------------------------------------------------------------------------------------------------------------------------------------------------------------------------------------------|
| Commissioning                 | 1. If the strategy behind the EPaCCs is definable, deliverable and measurable, the aim, purpose and outcomes of EPaCCS will be clear. <b>(strategy)</b>                                                                                  | <ul style="list-style-type: none"> <li>How will you evaluate EPaCCS success?</li> <li>What are the markers of success for you?</li> <li>What is the CCGs long term vision for the EPaCCS?</li> </ul>                                                                                                                                                                            |
|                               | 2. If HCPs engage with the EPaCCS positively on early usage and see it as an improvement on any previous EOL register, HCPs will engage positively with EPaCCS. <b>(engagement)</b>                                                      | <ul style="list-style-type: none"> <li>Given that the previous EOL register was generally not well thought of, or used, how did the CCG plan to get HCPs on board?</li> <li>How do you think the EPaCCS has been received?</li> </ul>                                                                                                                                           |
| Commissioning/Uptake/Adoption | 3. If the EPaCCS is well-publicised and marketed to all stakeholders HCPs will be aware of EPaCCS, understand the aim and purpose of the EPaCCS, and will initiate an EPaCCs template and/or access an EPaCCS record. <b>(publicity)</b> | <ul style="list-style-type: none"> <li>How was the EPaCCS publicised and marketed to different groups of healthcare professionals (HCPs)? What are your views on how effective this has been?</li> <li>How aware do you think HCPs are of EPaCCS and do you think they understand its purpose and importance?</li> </ul>                                                        |
|                               | 4. If HCPs receive sufficient support and training, so that they know how to use it, they and will initiate an EPaCCs template and/or access an EPaCCS record. <b>(training)</b>                                                         | <ul style="list-style-type: none"> <li>Can you tell us about the CCG strategy for providing training and support to different groups of HCPs in the EPaCCS rollout?</li> <li>What do you think about this, and how effective it has been?</li> </ul>                                                                                                                            |
| Uptake/Adoption               | 5. If HCPs have the time and/or resources to learn a new system, an EPaCCS template will be initiated. <b>(time &amp; resources)</b>                                                                                                     | <ul style="list-style-type: none"> <li>There are a significant number of GP practices that have not initiated an EPaCCS – do you have any thoughts about why this might be?</li> <li>Do you think all HCPs will have the time and resources (i.e. they are connected to a computer, have internet and NHS network access) to learn and new system and access EPaCCS?</li> </ul> |
|                               | 6. If HCPs are incentivised to use EPaCCS, an EPaCCS template will be initiated. <b>(incentives)</b>                                                                                                                                     | <ul style="list-style-type: none"> <li>Do HCPs have other ways of obtaining the information contained on EPaCCs?</li> <li>What might these be, and are these ways better or worse, more reliable or less reliable?</li> </ul>                                                                                                                                                   |
| Uptake                        | 7. If the patient consents to information-sharing and storage of information about their care preferences, an EPaCCS template will be initiated. <b>(information sharing)</b>                                                            | <ul style="list-style-type: none"> <li>For the EPaCCS to be effective, patients must consent to information-sharing, and the storage of information.</li> <li>Did you anticipate that this would raise any issues?</li> </ul>                                                                                                                                                   |
|                               | 8. If HCPs are near to a computer, are connected to the internet and have access to the GP EMIS record, an EPaCCS template will be initiated. <b>(access to system)</b>                                                                  | <ul style="list-style-type: none"> <li>There is a theory that because EPaCCS is an electronic record, presently only updateable by the GP on EMIS, that this will have an impact on the ability of others to access it and update it and own it. Do you see this as an issue?</li> <li>What impact do you think this might present?</li> </ul>                                  |
|                               | 9. If HCPs feel able/comfortable having advanced care planning                                                                                                                                                                           | <ul style="list-style-type: none"> <li>How do you think HCPs feel about having ACP conversations with patients?</li> </ul>                                                                                                                                                                                                                                                      |

|                            |                                                                                                                                                                                                                                                                 |                                                                                                                                                                                                                                                                                                                                                |
|----------------------------|-----------------------------------------------------------------------------------------------------------------------------------------------------------------------------------------------------------------------------------------------------------------|------------------------------------------------------------------------------------------------------------------------------------------------------------------------------------------------------------------------------------------------------------------------------------------------------------------------------------------------|
|                            | (ACP) conversations with patients, an EPaCCS template will be initiated. <b>(ACP conversations)</b>                                                                                                                                                             | <ul style="list-style-type: none"> <li>Research suggests that patients with non-malignant diagnoses are less likely to be added to EPaCCS.</li> <li>Do you think this is the case and if so why? Are there other patient groups who might be underrepresented on the EPaCCS?</li> </ul>                                                        |
|                            | 10. If HCPs feel that the EPaCCS facilitates, potentially difficult, ACP conversations an EPaCCS template will be initiated. <b>(ACP conversations)</b>                                                                                                         | <ul style="list-style-type: none"> <li>Some would argue that the EPaCCS template might facilitate ACP conversations with patients – what are your thoughts on this?</li> </ul>                                                                                                                                                                 |
|                            | 11. If the patient is willing, and has capacity to have ACP conversations, an EPaCCS template will be initiated. <b>(ACP conversations)</b>                                                                                                                     | <ul style="list-style-type: none"> <li>Patients can only record their wishes if they are able to have a conversation with an HCP – what issues do you think this might present?</li> </ul>                                                                                                                                                     |
| Adoption                   | 12. If EOLC information about a patient can be accessed more efficiently in other ways (i.e. speaking with carer or reading other sources of information) the information on the EPaCCS template may not be accessed. <b>(single point of access)</b>           | <ul style="list-style-type: none"> <li>Are there any other sources of information that HCPs might access to establish the EOL wishes and needs of a patient and do you think they present an issue of the uptake of EPaCCS?</li> </ul>                                                                                                         |
|                            | 13. If HCPs are near to a computer, are connected to the internet and have access to the NHS Network an EPaCCs template will be accessed. <b>(access to system)</b>                                                                                             | <ul style="list-style-type: none"> <li>There is a theory that because EPaCCS is an electronic record, presently only updateable by the GP on EMIS, that this will have an impact on the ability of others to access it and update it and own it.</li> <li>Do you see this as an issue? What impact do you think this might present?</li> </ul> |
| Adoption/Care Coordination | 14. If the information does not reflect the current wishes of the patient, care may not be aligned with the patients' preferences. <b>(patient preferences)</b>                                                                                                 | <ul style="list-style-type: none"> <li>Do you feel that the EPaCCs adequately reflects patient's wishes and preferences for care?</li> </ul>                                                                                                                                                                                                   |
|                            | 15. If the patient does not have clear or clinically meetable preferences, or their wishes are subject to frequent change, care may not be aligned with the patient's wishes. <b>(patient preferences)</b>                                                      | <ul style="list-style-type: none"> <li>Do you feel the EPaCCS adequately reflects the patient's/carer's wishes and preferences regarding end of life care and do you feel these wishes are deliverable? If not, why might this be and what needs to be improved?</li> </ul>                                                                    |
| Care Coordination          | 16. If HCPs access EPaCCS and consider the information contained within it to be trustworthy (current, relevant, detailed and useful) care will be coordinated by EPaCCs and this care will align with the patient's wishes. <b>(trustworthiness of EPaCCS)</b> | <ul style="list-style-type: none"> <li>Do you think the EPaCCS contains all the information HCPs need to enact their patient's wishes and coordinate their patient's care?</li> <li>Do you consider it to be current, relevant, detailed and useful? If not, why might this be and what needs to be improved?</li> </ul>                       |
|                            | 17. If EPaCCS does not enhance or improve the care that is already being delivered care may not be coordinated by EPaCCS, consistent or reflect the patients' preferences. <b>(patient outcomes)</b>                                                            | <ul style="list-style-type: none"> <li>What are your thoughts on the notion that: 'The EPaCCS is not coordinating care, it is simply recording what is already being done'</li> </ul>                                                                                                                                                          |

*Phase three: individual interviews with healthcare professionals (HCPs), patients, current and bereaved carers*

### Healthcare professionals (HCPs)

HCPs from community nursing teams, primary care, the ambulance service, the local hospices, care homes and secondary care will be invited to participate.

GPs working in practices within the CCG area will be invited to support the study and the study team will purposively sample from a list of practices, to include practices that are high-users of EPaCCS and low users of EPaCCS based on data compiled by the CCG.

The research team will purposively sample HCPs who express an interest in participating according to gender, age, and profession to ensure maximum variation in the sample. All interviews with HCPs will take place over the telephone for both pragmatic and methodological reasons. Conducting interviews over the telephone will reduce the time and cost to the study that may be involved in travelling to interviews and well-planned telephone interviews can gather the same material as those held face to face (29).

A topic guide, informed by the evolving programme theory, will be used to ensure consistency across the interviews. This will enable the research team to compare the views of each group at the stage of data analysis. Interviews will last approximately 30 minutes and it is anticipated that approximately 3-5 HCPs will be interviewed from each group (18-30 in total).

### Patients, current and bereaved carers

Patients will be approached to take part in interviews through their GP surgeries or the local hospice. The research team will purposively sample from a list of practices, to include practices that are high-users of EPaCCS and low users of EPaCCS based on data compiled by the CCG. Selected practices will be asked to identify patients, aged 18 and over, receiving EOL care, who they consider might be eligible to take part in the study.

### *Inclusion criteria:*



- 1
- 2
- 3 1. Capacity to give informed consent
- 4
- 5
- 6 2. Aged 18 and over
- 7
- 8
- 9 3. Prognosis 12 months or less (patient aware of this prognosis)
- 10

11 Potential participants will be sampled purposively to include patients across the age range,  
12 with and without an EPaCCS record, with both malignant and non-malignant health  
13 conditions.  
14  
15

16  
17  
18 To recruit patients to the study from the local hospice we will liaise with key clinical staff,  
19 who will be responsible for identifying appropriate patients. Once again, potential  
20 participants will be sampled purposively to include patients across the age range, with and  
21 without an EPaCCS record, with both malignant and non-malignant health conditions.  
22  
23

24  
25  
26 Alongside their own study information pack, all patients will be given a carer information  
27 pack which they can choose to give to their carer if they are happy for their carer to  
28 participate in the study.  
29  
30

31  
32  
33 GPs will also be asked to identify recently bereaved carers (between 8 weeks and 6 months of  
34 the death of their relative), who they consider might be eligible to take part in the study. GPs  
35 will be sent details of how to perform an appropriate search within EMIS to identify potential  
36 participants.  
37  
38

39  
40  
41 Interviews with carers will be conducted one-to-one with the interviewer. Interviews with  
42 patients will be conducted either one-to-one with the interviewer or in the presence of their  
43 carer, according to the wishes of the patient.  
44  
45

46  
47  
48 Interviews will last approximately 45 minutes and it is anticipated that approximately 15  
49 patients will be interviewed (10 EPaCCS patients and 5 non-EPaCCS patients) and 10 carers  
50 (to include both current and bereaved). All interviews will be audio taped and transcribed  
51 verbatim.  
52  
53

1  
2  
3  
4  
5  
6 ***Phase four: retrospective cohort study of routinely collected data on EPaCCS usage***  
7

8  
9 EMIS data will be accessed to identify all patients, aged 18 and over, who die in the CCG  
10 area between 22nd February 2018 and 21st February 2019. Patients will be identified as  
11 either having an EPaCCS record (EPaCCS patient) or not (non-EPaCCS patient).  
12  
13

14  
15  
16 EMIS will be used to characterise both EPaCCS and non-EPaCCS patients in terms of their  
17 gender, ethnicity and postcode (as a proxy for socio-economic status according to their Index  
18 of Multiple Deprivation Score). Data will be extracted to describe:  
19  
20  
21

- 22 1. The proportion of patients that die with an EPaCCS record.
- 23 2. When the EPaCCS record is initiated (i.e. how many months/days prior to the  
24 patient's death), and by whom.
- 25 3. How frequently the EPaCCS record is updated once opened, and who makes any  
26 changes.
- 27 4. The underlying cause and place of death for EPaCCS and non-EPaCCS patients.
- 28 5. The number of hospital admissions and Emergency Department attendances for  
29 EPaCCS and non-EPaCCS patients in the last 12 months of life.  
30  
31  
32  
33  
34  
35  
36  
37  
38  
39  
40  
41  
42  
43

44 Data from the integrated digital care record will be accessed to describe which HCPs (GPs,  
45 community nurses, hospice HCPs, ambulance HCPs and secondary care clinicians) are  
46 accessing these shared end-of-life care records.  
47  
48  
49  
50  
51  
52  
53

54 ***Phase five: data analysis and synthesis of study findings***  
55

56 *Quantitative methods*  
57  
58  
59  
60

1  
2  
3 Quantitative data will be analysed using Stata v15 and reported using descriptive statistics.

4  
5 Logistic regression will be used to determine the adjusted odds ratio and 95% confidence  
6  
7 intervals for the associations between having an EPaCCS record and dying at home, adjusted  
8  
9 for socio-demographic and medical characteristics (age, sex, deprivation and underlying  
10  
11 cause of death).  
12  
13

14  
15 Of approximately 8,000 deaths occurring in the CCG area over the year of study, we expect  
16  
17 around 10% (800 deaths) of patients to have an EPaCCS. If the proportion of deaths  
18  
19 occurring at home is expected to be 25% among those without an EPaCCS, we would have  
20  
21 over 99% power to detect an absolute increase of 10% to 35% among those with an EPaCCS.  
22  
23 The power would be about 84% if the proportion were increased by 5% to 30%.  
24  
25

### 26 27 *Qualitative methods*

28  
29 Data analysis will be conducted using a realist approach informed by Jackson and Kolla's  
30  
31 realistic evaluation analysis method (30). This analytic process will involve the following  
32  
33 steps:  
34  
35

- 36  
37 1. Coding individual units (a discrete C, M or O) within the narratives of the interviews.
- 38  
39 2. Identifying the complex connections that link these codes together into dyads or  
40  
41 triads.
- 42  
43 3. Subsuming the linked codes into themes using thematic analysis (30).  
44  
45

46  
47 Analysis will begin shortly after data collection starts and be ongoing and iterative. Analysis  
48  
49 will inform further data collection: for instance, analytic insights from data gathered in earlier  
50  
51 interviews will be used to develop and adapt the programme theory and in turn, identify any  
52  
53 changes that need to be made to the topic guide for use during later interviews. The study will  
54  
55 generate new programme theories to explain how the EPaCCS works, for whom, and any  
56  
57 contextual influences and constraining factors that affect their initiation and usage. Emerging  
58  
59  
60

1  
2  
3 analysis and findings will be discussed with PPI representatives, to explore and clarify  
4  
5 findings.  
6  
7

8 Qualitative and quantitative data will be collected concurrently, giving equal weight to each  
9  
10 (31). Data will be triangulated in order to test and refine the programme theories, accepting  
11  
12 that any findings are fallible and with time and further study new data are bound to emerge  
13  
14 (32). The synthesised study findings will establish the potential outcomes of EPaCCS,  
15  
16 identify the underlying mechanisms which explain how they produce these effects and  
17  
18 highlight the key contextual factors that affect their success or failure. Recommendations can  
19  
20 then be made for the development and implementation of EPaCCS.  
21  
22  
23

### 24 *Patient and Public Involvement*

25  
26 To support the development of this study protocol, members of the study team (LF and LP)  
27  
28 presented and discussed an outline proposal of this study to patients, staff and carers at the  
29  
30 local hospice on two separate occasions in April 2018. Approximately 10 participants  
31  
32 voluntarily took part in these discussions. These meetings raised several important issues  
33  
34 which have been incorporated into the design of this study. Such issues included allowing  
35  
36 patients the choice of whether to have a carer sit alongside them during their interview and  
37  
38 which HCPs they felt it was important that the study team spoke to, due to the involvement  
39  
40 they had in providing care for patients. The meetings also discussed what terms, wording and  
41  
42 questions would be acceptable to patients and carers to read and hear in the study information  
43  
44 documents and interviews.  
45  
46  
47  
48  
49

50  
51 At the end of both meetings, patients and carers were invited to continue to support the  
52  
53 design of the study should they wished. Two members came forward expressing a wish to be  
54  
55 more actively involved in the study. They have kindly been involved in reviewing all the  
56  
57 study literature, including the topic guides, study information sheets and the lay summary for  
58  
59  
60

1  
2  
3 this protocol. It is hoped that they will wish to continue their involvement with the study.

4  
5 This will include informing the content of materials for lay audiences, drawing links to  
6  
7 groups and forums that the research team may be unaware of, and supporting the study team  
8  
9 with the interpretation and dissemination of study findings. To ensure ongoing PPI, all  
10  
11 patients and carers taking part in the study will be invited to support the ongoing  
12  
13 development of the study.  
14  
15

### 16 17 18 19 **Ethics and dissemination**

20  
21 The study has been approved by NHS South West – Frenchay Research Ethics Committee  
22  
23 (REC reference number: 18/SW/0198).  
24  
25

26  
27 The research team will disseminate the findings to a range of stakeholders. We will draw on  
28  
29 the networks and expertise of the local CCG end-of-life care board to disseminate the  
30  
31 research outputs widely and appropriately. Key audiences include patient and carer  
32  
33 organisations, GPs and community nursing teams in primary care, ambulatory services and  
34  
35 care home staff, HCPs working in secondary palliative care services and hospices, managers  
36  
37 and directors within healthcare organisations with responsibility to provide high-quality  
38  
39 services within budget and healthcare policymakers, nationally and internationally.  
40  
41  
42  
43  
44  
45

### 46 47 **Acknowledgements**

48  
49 We would like to thank all the patients, carers and HCPs who helped to support the PPI in  
50  
51 development of this study.

52  
53 We would also like to thank Dr Justin Jagosh, Director of the Centre for Advancement in  
54  
55 Realist Evaluation and Synthesis (<https://realistmethodology-cares.org/>), for his support and  
56  
57 guidance in developing the initial programme theory.  
58  
59  
60

## Contributors

LP was the principal investigator for this qualitative study. LF, MF, RM and SP all contributed to the development of the study protocol. LP and LF drafted this manuscript. All authors contributed to the editing of the final manuscript and the refining of its intellectual content.

## Funding

LP's time is paid for by a NIHR School for Primary Care Research GP Career Progression Fellowship. This fellowship funding will also meet the research costs. LF's time is paid for by NIHR Research Capability Funding. MF's time is supported by the NIHR Collaboration for Leadership in Applied Health Research and Care West (NIHR CLAHRC West). The study is supported by the NIHR West of England Clinical Research Network. The views expressed in this publication are those of the authors and not necessarily those of the NHS, the National Institute for Health Research or the Department of Health and Social Care.

## Competing interests

We have read and understood BMJ policy on declaration of interests and declare that we have no competing interests.

## References

1. National Institute for Health and Care Excellence (2004). Improving supportive and palliative care for adults with cancer. Cancer service guideline [CSG4].
2. Palliative and end of life care Priority Setting Partnership: Putting patients, carers and clinicians at the heart of palliative and end of life care research. January 2015.

Available at:

[https://www.mariecurie.org.uk/globalassets/media/documents/research/PeolcPSP\\_Final\\_Report.pdf](https://www.mariecurie.org.uk/globalassets/media/documents/research/PeolcPSP_Final_Report.pdf) (accessed 30/05/18)

3. Barker I, Steventon A, Deeny SR. Association between continuity of care in general practice and hospital admissions for ambulatory care sensitive conditions: cross sectional study of routinely collected, person level data. *BMJ* 2017;356:j84
4. Schweitzer B, Blankenstein N, Deliens L, Van Der Horst H. Out-of-hours palliative care provided by GP co-operatives in the Netherlands: A focus group study. *European Journal of General Practice*, 2011; 17: 160–166.
5. Hall S, Murchie P, Campbell C and Murray SA. Introducing an electronic Palliative Care Summary (ePCS) in Scotland: patient, carer and professional perspectives. *Family Practice* 2012; 29:576–585.
6. Richards SH, Winder R, Seamark C, Seamark D, Avery S, Gilbert J, Barwick A and Campbell JL. 2011: The experiences and needs of people seeking palliative health care out-of-hours: a qualitative study. *Primary Health Care Research & Development* 12(2), 165–78; available from: PM:21457601.
7. Leydon GM, Shergill NK, Champion-Smith C, et al. Discontinuity of care at end of life: a qualitative exploration of OOH end of life care. *BMJ Supportive & Palliative Care* 2013;3:412-421.
8. Purdy S, Lasseter G, Griffin T, Wye L. Impact of the Marie Curie Cancer Care Delivering Choice Programme in Somerset and North Somerset on place of death and hospital usage: a retrospective cohort study. *BMJ Supportive & Palliative Care* 2014;0:1–6.
9. Asprey A, Richards SH, Wright C, Seamark C, Seamark D and Moxon J. Transferring information to an out-of-hours primary care service for patients with palliative care

- 1  
2  
3 needs: an action research study to improve the use of handover forms. *Primary Health*  
4  
5 *Care Research & Development* 2013; 14: 7–20.  
6  
7
- 8 10. Wye L, Lasseter G, Simmonds B, Duncan L, Percival J and Purdy S. Electronic  
9  
10 palliative care coordinating systems (EPaCCS) may not facilitate home deaths: A  
11  
12 mixed methods evaluation of end of life care in two English counties. *Journal of*  
13  
14 *Research in Nursing*, 2016, Vol. 21(2) 96–107  
15  
16
- 17 11. National Institute for Health and Clinical Excellence (2011) End of Life Care for  
18  
19 Adults. NICE Quality Standard [QS13]  
20  
21
- 22 12. Petrova M, Riley J, Abel J and Barclay S. Crash course in EPaCCS (Electronic  
23  
24 Palliative Care Coordination Systems): 8 years of successes and failures in patient  
25  
26 data sharing to learn from. *BMJ Supportive & Palliative Care* 2016;0:1–9.  
27  
28
- 29 13. Department of Health (2012) End of Life Care Strategy: Fourth Annual Report.  
30  
31 Available at:  
32  
33 [https://assets.publishing.service.gov.uk/government/uploads/system/uploads/attachme](https://assets.publishing.service.gov.uk/government/uploads/system/uploads/attachment_data/file/136486/End-of-Life-Care-Strategy-Fourth-Annual-report-web-version-v2.pdf)  
34  
35 [nt\\_data/file/136486/End-of-Life-Care-Strategy-Fourth-Annual-report-web-version-](https://assets.publishing.service.gov.uk/government/uploads/system/uploads/attachment_data/file/136486/End-of-Life-Care-Strategy-Fourth-Annual-report-web-version-v2.pdf)  
36  
37 [v2.pdf](https://assets.publishing.service.gov.uk/government/uploads/system/uploads/attachment_data/file/136486/End-of-Life-Care-Strategy-Fourth-Annual-report-web-version-v2.pdf) (accessed 30/05/18)  
38  
39
- 40 14. Turner V, Flemming K. Socioeconomic factors affecting access to preferred place of  
41  
42 death: A qualitative evidence synthesis. *Palliative medicine* 2019 Mar  
43  
44 8:0269216319835146.  
45  
46
- 47 15. Department of Health (2016) Our Commitment to you for end of life care: the  
48  
49 Government Response to the Review of Choice in End of Life Care. Available at:  
50  
51 [https://assets.publishing.service.gov.uk/government/uploads/system/uploads/attachme](https://assets.publishing.service.gov.uk/government/uploads/system/uploads/attachment_data/file/536326/choice-response.pdf)  
52  
53 [nt\\_data/file/536326/choice-response.pdf](https://assets.publishing.service.gov.uk/government/uploads/system/uploads/attachment_data/file/536326/choice-response.pdf) (accessed 21/03/19)  
54  
55
- 56 16. Office for National Statistics. National Survey of Bereaved People (VOICES):  
57  
58 England, 2015. Available at:  
59  
60



1  
2  
3 [https://www.ons.gov.uk/peoplepopulationandcommunity/healthandsocialcare/healthcaresystem/bulletins/nationalsurveyofbereavedpeoplevoices/england2015#preferences-](https://www.ons.gov.uk/peoplepopulationandcommunity/healthandsocialcare/healthcaresystem/bulletins/nationalsurveyofbereavedpeoplevoices/england2015#preferences-and-choice-at-the-end-of-life)  
4  
5  
6 [and-choice-at-the-end-of-life](https://www.ons.gov.uk/peoplepopulationandcommunity/healthandsocialcare/healthcaresystem/bulletins/nationalsurveyofbereavedpeoplevoices/england2015#preferences-and-choice-at-the-end-of-life) (accessed 30/05/18)  
7  
8  
9

- 10 17. Public Health England, End of Life Care Profiles. Available at:  
11  
12 <https://fingertips.phe.org.uk/profile/end-of-life> (accessed 30/05/18)  
13  
14  
15 18. Allsop MJ, Kite S, McDermott S, Penn N, Millares-Martin P and Bennett MI.  
16  
17 Electronic palliative care coordination systems: Devising and testing a methodology  
18 for evaluating documentation, *Palliative Medicine* 2017 May; 31(5): 475–482.  
19  
20  
21 19. Fallowfield L and Jenkins V. Communicating sad, bad, and difficult news in  
22  
23 medicine. *The Lancet*, 2004;363(9405), 312-319.  
24  
25  
26 20. Gibbins J, McCoubrie R, and Forbes K. Why are newly qualified doctors unprepared  
27  
28 to care for patients at the end of life? *Medical education*;2011, 45(4), 389-399.  
29  
30  
31 21. Whole Systems Partnership. (2016) *Independent evaluation of Electronic Palliative*  
32  
33 *Care Co-ordination Systems (EPaCCS) in England: Final Report*, March 2016  
34  
35  
36 22. Wye L, Lasseter GM, Percival JF, Simmonds BAJ, Duncan LJ, Purdy S. Independent  
37  
38 Evaluation of the Marie Curie Cancer Care Delivering Choice Programme in  
39  
40 Somerset and North Somerset. Centre for Primary Health Care, Department of Social  
41  
42 and Community Medicine, The University of Bristol, 2012.  
43  
44  
45 23. NHS Digital (2015). SCCI1580: Palliative Care Co-ordination: Core Content.  
46  
47 Available at: [https://digital.nhs.uk/data-and-information/information-](https://digital.nhs.uk/data-and-information/information-standards/information-standards-and-data-collections-including-extractions/publications-and-notifications/standards-and-collections/scci1580-palliative-care-co-ordination-core-content)  
48  
49 [standards/information-standards-and-data-collections-including-](https://digital.nhs.uk/data-and-information/information-standards/information-standards-and-data-collections-including-extractions/publications-and-notifications/standards-and-collections/scci1580-palliative-care-co-ordination-core-content)  
50  
51 [extractions/publications-and-notifications/standards-and-collections/scci1580-](https://digital.nhs.uk/data-and-information/information-standards/information-standards-and-data-collections-including-extractions/publications-and-notifications/standards-and-collections/scci1580-palliative-care-co-ordination-core-content)  
52  
53 [palliative-care-co-ordination-core-content](https://digital.nhs.uk/data-and-information/information-standards/information-standards-and-data-collections-including-extractions/publications-and-notifications/standards-and-collections/scci1580-palliative-care-co-ordination-core-content) (accessed 23/01/19)  
54  
55  
56 24. Pawson R and Tilley N. Realistic Evaluation. London: Sage, 2005.  
57  
58  
59  
60

- 1  
2  
3 25. National End of Life Care Intelligence Network. (2014). *Electronic Palliative Care*  
4  
5 *Co-ordination Systems (EPaCCS) in England: Survey of clinical commissioning*  
6  
7 *groups (2013)*.  
8  
9
- 10 26. Jagosh J, Bush PL, Salsberg J, Macaulay AC, Greenhalgh T, Wong G et al. A realist  
11  
12 evaluation of community-based participatory research: partnership synergy, trust  
13  
14 building and related ripple effects. *BMC public health*. 2015 Dec;15(1):725.  
15  
16
- 17 27. Pawson R. *Evidence based policy: A realist perspective*. London: Sage, 2006.  
18
- 19 28. Greenhalgh T, Wong G, Jagosh J, et al Protocol—the RAMESES II study: developing  
20  
21 guidance and reporting standards for realist evaluation *BMJ Open* 2015;5:e008567.  
22  
23 doi: 10.1136/bmjopen-2015-008567  
24  
25
- 26 29. Sturges JE, Hanrahan KJ. Comparing telephone and face-to-face qualitative  
27  
28 interviewing: a research note. *Qual Res*. 2004 Apr;4(1):107-18.  
29
- 30 30. Jackson SF, Kolla G. A new realistic evaluation analysis method: linked coding of  
31  
32 context, mechanism, and outcome relationships. *American Journal of Evaluation*.  
33  
34 2012 Sep;33(3):339-49.  
35  
36
- 37 31. Hanson WE, Creswell JW, Clark VL, Petska KS, Creswell JD. Mixed methods  
38  
39 research designs in counseling psychology. *Journal of counseling psychology*. 2005  
40  
41 Apr;52(2):224.  
42  
43
- 44 32. Emmel N, Greenhalgh J, Manzano A, Monaghan M, Dalkin S (Eds). *Doing realist*  
45  
46 *research*. London: Sage, 2018.  
47  
48  
49  
50  
51  
52  
53  
54  
55  
56  
57  
58  
59  
60

**Figure 1 – Definition of Context, Mechanism and Outcome*****Context***

Something that existed prior to the introduction of the EPaCCS, for example cultural views and beliefs around talking about death and dying and Advanced Care Planning (ACP) conversations. Contexts might also refer to the setting, (e.g. primary or secondary care) or patient characteristics (e.g. underlying diagnosis, socio-demographics, mental capacity).

***Mechanism***

The intended or unintended resources created by an intervention and the response to those resources (cognitive, emotional, motivational etc) by Healthcare Professionals (HCPs), patients and carers. Mechanisms can pertain to why HCPs and patients choose (or choose not) to utilise the EPaCCS.

***Outcome***

An outcome will define the result of the EPaCCS whether intended (did the project succeed against the criteria it set itself at the outset), and also the unplanned and/or unexpected impacts.

Informed by (24) and (26).

1  
2  
3  
4  
5  
6  
7  
8  
9  
10  
11  
12  
13  
14  
15  
16  
17  
18  
19  
20  
21  
22  
23  
24  
25  
26  
27  
28  
29  
30  
31  
32  
33  
34  
35  
36  
37  
38  
39  
40  
41  
42  
43  
44  
45  
46  
47

Figure 2 – Visual representation of the initial programme theory at a macro level. See table 1 for associated CMO statements.

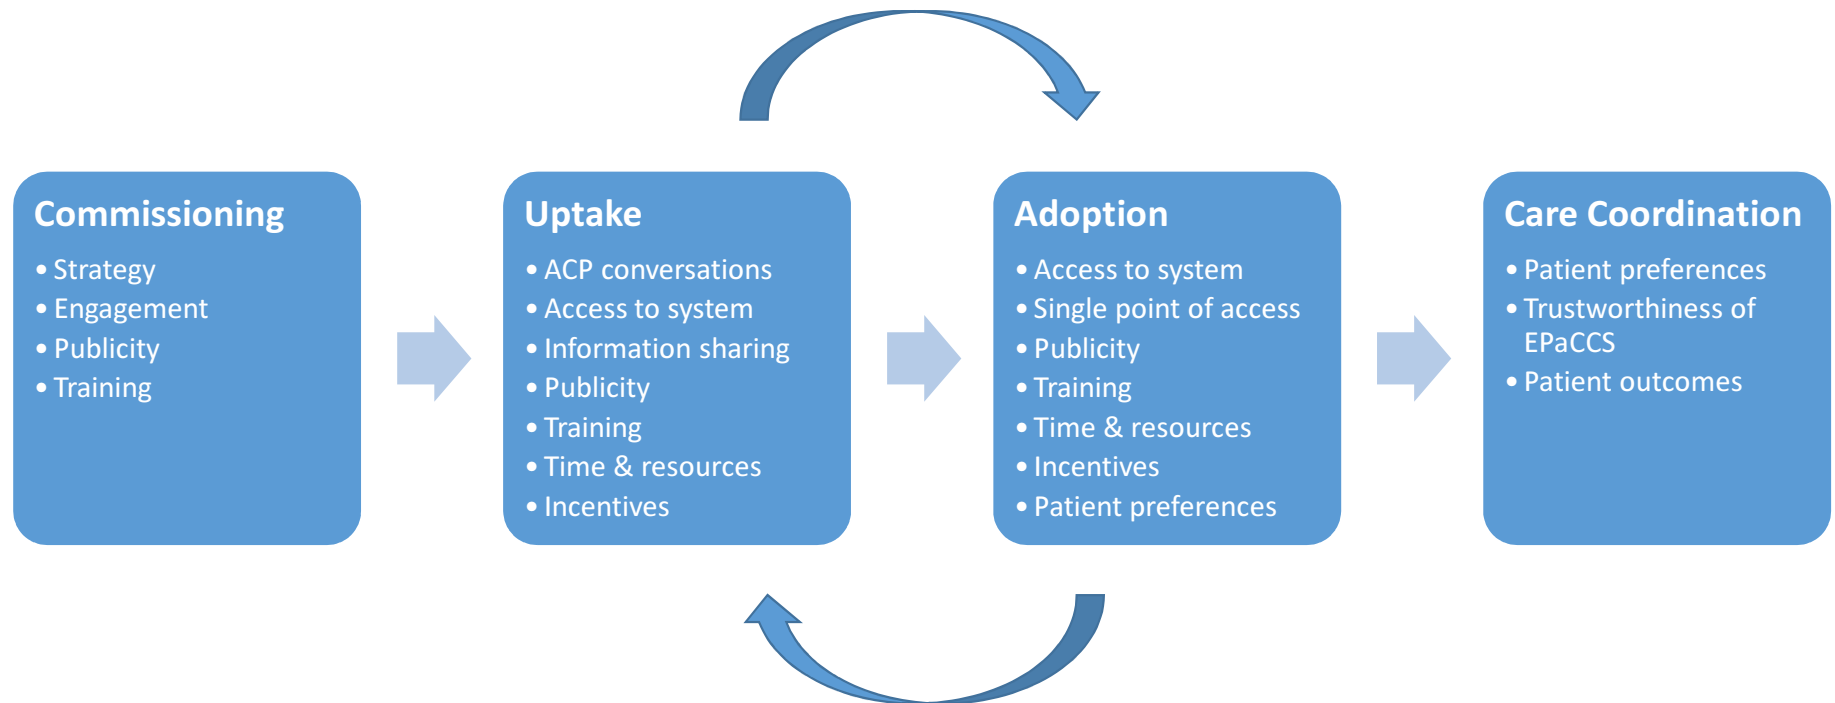

# BMJ Open

## THE IMPACT OF ELECTRONIC PALLIATIVE CARE COORDINATION SYSTEMS (EPaCCS) ON CARE AT THE END OF LIFE ACROSS MULTIPLE CARE SECTORS IN ENGLAND: A REALIST EVALUATION PROTOCOL

|                                 |                                                                                                                                                                                                                                                                                                                                                                                              |
|---------------------------------|----------------------------------------------------------------------------------------------------------------------------------------------------------------------------------------------------------------------------------------------------------------------------------------------------------------------------------------------------------------------------------------------|
| Journal:                        | <i>BMJ Open</i>                                                                                                                                                                                                                                                                                                                                                                              |
| Manuscript ID                   | bmjopen-2019-031153.R1                                                                                                                                                                                                                                                                                                                                                                       |
| Article Type:                   | Protocol                                                                                                                                                                                                                                                                                                                                                                                     |
| Date Submitted by the Author:   | 09-Aug-2019                                                                                                                                                                                                                                                                                                                                                                                  |
| Complete List of Authors:       | Pocock, Lucy; University of Bristol, Centre for Academic Primary Care<br>French, Lydia; University of Bristol, Centre for Academic Primary Care<br>Farr, Michelle; University of Bristol, NIHR CLAHRC West, Bristol Medical School<br>Morris, Richard; University of Bristol, School of Social & Community Medicine<br>Purdy, Sarah; University of Bristol, Centre for Academic Primary Care |
| <b>Primary Subject Heading</b>: | Palliative care                                                                                                                                                                                                                                                                                                                                                                              |
| Secondary Subject Heading:      | Health services research                                                                                                                                                                                                                                                                                                                                                                     |
| Keywords:                       | PALLIATIVE CARE, Quality in health care < HEALTH SERVICES ADMINISTRATION & MANAGEMENT, PRIMARY CARE, QUALITATIVE RESEARCH                                                                                                                                                                                                                                                                    |
|                                 |                                                                                                                                                                                                                                                                                                                                                                                              |

SCHOLARONE™  
Manuscripts

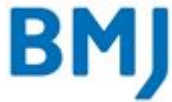

I, the Submitting Author has the right to grant and does grant on behalf of all authors of the Work (as defined in the below author licence), an exclusive licence and/or a non-exclusive licence for contributions from authors who are: i) UK Crown employees; ii) where BMJ has agreed a CC-BY licence shall apply, and/or iii) in accordance with the terms applicable for US Federal Government officers or employees acting as part of their official duties; on a worldwide, perpetual, irrevocable, royalty-free basis to BMJ Publishing Group Ltd ("BMJ") its licensees and where the relevant Journal is co-owned by BMJ to the co-owners of the Journal, to publish the Work in this journal and any other BMJ products and to exploit all rights, as set out in our [licence](#).

The Submitting Author accepts and understands that any supply made under these terms is made by BMJ to the Submitting Author unless you are acting as an employee on behalf of your employer or a postgraduate student of an affiliated institution which is paying any applicable article publishing charge ("APC") for Open Access articles. Where the Submitting Author wishes to make the Work available on an Open Access basis (and intends to pay the relevant APC), the terms of reuse of such Open Access shall be governed by a Creative Commons licence – details of these licences and which [Creative Commons](#) licence will apply to this Work are set out in our licence referred to above.

Other than as permitted in any relevant BMJ Author's Self Archiving Policies, I confirm this Work has not been accepted for publication elsewhere, is not being considered for publication elsewhere and does not duplicate material already published. I confirm all authors consent to publication of this Work and authorise the granting of this licence.

1  
2  
3 **THE IMPACT OF ELECTRONIC PALLIATIVE CARE COORDINATION**  
4  
5 **SYSTEMS (EPaCCS) ON CARE AT THE END OF LIFE ACROSS MULTIPLE**  
6  
7 **CARE SECTORS IN ENGLAND: A REALIST EVALUATION PROTOCOL**  
8  
9

10  
11  
12 **Corresponding author**  
13

14 Lucy V Pocock, Population Health Sciences, Bristol Medical School, University of Bristol,

15  
16 Canynge Hall, 39 Whatley Road, Bristol, BS8 2PS

17  
18 [Lucy.pocock@bristol.ac.uk](mailto:Lucy.pocock@bristol.ac.uk), Tel: 07810 002320  
19  
20  
21  
22

23  
24 **Co-authors**  
25

26 Lydia R M French, Population Health Sciences, Bristol Medical School, University of  
27  
28 Bristol, Bristol, UK

29  
30 Michelle Farr, The National Institute for Health Research Collaboration for Leadership in  
31  
32 Applied Health Research and Care West (NIHR CLAHRC West) at University Hospitals  
33  
34 Bristol NHS Foundation Trust, UK  
35  
36

37 Richard Morris, Population Health Sciences, Bristol Medical School, University of Bristol,  
38  
39 Bristol, UK  
40  
41

42 Sarah Purdy, Population Health Sciences, Bristol Medical School, University of Bristol,  
43  
44 Bristol, UK,  
45  
46  
47  
48

49 Word Count: 3862  
50  
51  
52  
53  
54  
55  
56  
57  
58  
59  
60

## Abstract

*Introduction:* Electronic palliative care coordination systems (EPaCCS) aim to support people approaching the end-of life to receive consistent care, according to their wishes, that is coordinated effectively across multiple care sectors. They are in use across the UK although empirical evidence into their effectiveness is poor. This paper presents a protocol of a mixed-methods study, to understand how, and by whom, EPaCCS are being used and whether EPaCCS are enabling Healthcare Professionals (HCPs) to coordinate patients' end-of-life (EOL) care.

*Methods and Analysis:* This is a mixed-methods study, carried out within a realist paradigm, to evaluate the impact of an EPaCCS on EOL care as provided by a Clinical Commissioning Group (CCG) in England. This study has two aims: 1. Describe the socio-demographic characteristics of patients who die with an EPaCCS record, their underlying cause of death and place of death and compare these with patients who die without an EPaCCS record. 2. Explore the impact of an EPaCCS on the experience of receiving EOL care for patients and their carers, and understand HCPs' views and experiences of utilising an EPaCCS to coordinate care for their patients. The study will be conducted in five phases: (1) development of the initial programme theory; (2) focus group with CCG stakeholder board; (3) individual interviews with HCPs, patients, current and bereaved carers; (4) retrospective cohort study of routinely collected data on EPaCCS usage and (5) data analysis and synthesis of study findings.

*Ethics and dissemination:* The study has been approved by NHS South West – Frenchay Research Ethics Committee (REC reference number: 18/SW/0198). Findings will be published in a wide range of outputs targeted at key audiences.

### *Strengths and limitations of this study*



- Using a theory-driven realist evaluation approach, findings from this study are expected to generate contextually relevant evidence for other care coordination systems, as well as informing EPaCCS commissioning decision-making nationally.
- The study will test and refine these theories using a mixed methods approach, enhancing the credibility of the evaluation findings.
- This study addresses the need for qualitative research into the use of EPaCCS, offering much needed insight into patient and carers' experiences of EPaCCS.
- The study will investigate the impact of only one of the many EPaCCS developed and implemented in the UK.
- Some may perceive the small sample sizes in the qualitative sections of the study as a weakness. However, the aim of the study is not to find a robust causal mechanism for EPaCCS, but to unpack the contexts and mechanisms that work in certain circumstances. Following this we will highlight the factors which are crucial for effectiveness, providing essential guidance for implementation of EPaCCS in other localities.

### **Key words**

**Palliative Care, Quality in Health Care, Primary Care, Qualitative Research**

## Background

People at the end-of-life (taken here to mean in the last 12 months of life) frequently receive care from a wide variety of teams and organisations. Much of this care is accessed in the out-of-hours period (overnight and at the weekend), when they are unlikely to see a Healthcare Professional (HCP) who knows them well. Out-of-hours provision of palliative care (defined by NICE as “the active holistic care of patients with advanced, progressive illness” (1)) has been identified as a key priority for future research by the Palliative and End of Life Care Priority Setting Partnership, initiated in 2013 by Marie Curie (2). This process identified the top 10 unanswered research questions and the question with the highest priority was, “What are the best ways of providing palliative care outside of working hours to avoid crises and help patients to stay in their place of choice?”

Continuity of care is important for anyone with complex health and social care needs, but particularly for those at the end-of-life (EOL) (3). Until recently HCPs have communicated patients’ end of life care plans, to other HCPs, by means of a variety of methods, including shared end of life care registers, letters, faxes and telephone and/or face to face conversations. Despite this, a lack of information sharing has been repeatedly cited as a barrier to the provision of good quality EOL care outside of normal working hours (4,5,6). Recent studies looking at the experiences and needs of people seeking palliative care out-of-hours found that most patients expect the HCP to be able to access a summary of their complex medical history and many voiced concerns that their full record could not be accessed by out-of-hours clinicians (5,7). For some patients, lack of access to their notes is a deterrent to accessing care out-of-hours (6).

Nationally, the policy drive to address the issue of information continuity has resulted in the development of Electronic Palliative Care Coordination Systems, or EPaCCS (5,8,9,10).

These records are usually completed by the patients’ GP or community nurse, including

1  
2  
3 patients' advance care wishes, and are accessible across multiple care sectors (10). The  
4  
5 purpose of EPaCCS is to provide a shared local record for health and social care  
6  
7 professionals, with key information about an individual approaching the EOL, including their  
8  
9 expressed preferences for care. In accordance with the Quality Statements in the NICE End  
10  
11 of Life Care Standard for Adults (11) the intent is for EPaCCS to support people approaching  
12  
13 the EOL to receive consistent care that is coordinated effectively across all relevant settings.  
14  
15

16  
17 An EPaCCS record can take various forms, including web-based electronic registers, systems  
18  
19 based on sharing care summaries or care plans, alongside patients' electronic records. They  
20  
21 store a dynamic record of a patient's medical condition, treatment, wishes and preferences,  
22  
23 and provide information about the medication a patient is receiving, contact details of any  
24  
25 carers, and services involved in providing care and support to the patient.  
26  
27

28  
29 Sharing information about patients' EOL care has the potential to improve coordination and  
30  
31 communication across care settings (12). It may reduce the chance of emergency department  
32  
33 attendance, hospital admission and dying in hospital (8, 13).  
34  
35

36  
37 It is now recognised that place of death is unlikely to be the most important factor in  
38  
39 achieving a good death and a recent UK study has proposed that it is the presence of loved  
40  
41 ones that is more important than the physical location (14). However, death in preferred place  
42  
43 remains a significant measure of quality of death (15) and, according to the Voices survey of  
44  
45 bereaved people, despite 81% of respondents believing that the deceased had wanted to die at  
46  
47 home less than a quarter of people actually achieve this (16, 17).  
48  
49

50  
51 Quantitative studies have shown striking differences in place of death with EPaCCS but are  
52  
53 potentially biased and confounded (12). A more recent study challenges these assumptions,  
54  
55 suggesting that the increase in home deaths could in fact be due to selection bias (few  
56  
57 secondary care colleagues used the systems and therefore hospital deaths are not captured)  
58  
59  
60

1  
2  
3 (10). The findings of this study also underscore the importance of qualitative approaches,  
4 which can offer crucial insights into what is happening on the ground, away from broad  
5 claims of EPaCCS benefits arrived at solely through quantitative methods. Without  
6 understanding the experiences of patients and carers, together with the perspectives of HCPs,  
7 it is difficult to evaluate the effectiveness of EPaCCS (18).  
8  
9

10  
11  
12  
13  
14  
15 Technology in isolation is not guaranteed to bring benefit and the initiation of an EPaCCS  
16 relies on healthcare professionals initiating conversations about death and dying. There is  
17 evidence that these conversations are difficult for HCPs (19), with many choosing to avoid  
18 the conversation altogether (20). What impact EPaCCS has upon these conversations, if any,  
19 is not clear.  
20  
21  
22  
23  
24  
25

26  
27 A recent independent evaluation of EPaCCS found that “it was not possible to demonstrate  
28 that EPaCCS was making any difference to the care patients were receiving at the end-of-life  
29 because the range of clients for whom EPaCCS was being used remains focused on cancer,  
30 and the ability of EPaCCS systems to report on progress and outcomes remains generally  
31 poor” (21).  
32  
33  
34  
35  
36  
37  
38

39 We therefore do not know if EPaCCS acts to improve practice or whether it simply  
40 documents and reflects what is already taking place in practice (21). Indeed, the need to  
41 gather evidence of effectiveness of EPaCCS before widespread and uncritical adoption by the  
42 NHS is key.  
43  
44  
45  
46  
47  
48

49 To summarise, very little research has been carried out to understand how, and by whom,  
50 EPaCCS are being used and, perhaps more importantly, whether EPaCCS are enabling HCPs  
51 to support patients’ EOL wishes. Rigorous evaluation and research are urgently needed to  
52 investigate to what extent EPaCCS influence services working together to support ‘a good  
53 death’, the outcome that stakeholders think is of most importance (22).  
54  
55  
56  
57  
58  
59  
60

## **Aims, Objectives and Research Questions**

The study has two aims. These are to:

1. Describe the socio-demographic characteristics of patients who die with an EPaCCS record, their underlying cause of death and place of death and compare these with patients who die without an EPaCCS record.
2. Explore the impact of an EPaCCS on the experience of receiving EOL care for patients and their carers, and understand HCPs' views and experiences of utilising an EPaCCS to provide palliative care to their patients.

## **Project methodology**

### *Study setting*

This study will be implemented in England, where one Clinical Commissioning Group (CCG) has recently developed and rolled out an EPaCCS. This involved the dissemination of an EMIS template, which was circulated to General Practices, to help ensure consistent data entry and coding. EMIS is the most widely used primary care clinical system in the UK and allows real-time patient information to be shared securely between different organisations.

All practices in the CCG area are EMIS users and it is now also used by the local hospice and many of the community nursing teams.

The EPaCCS template was developed following extensive local clinical consultation and the National Information Standard (23). Although some organisations within the CCG area (ambulance service, secondary and social care) are non-EMIS users, information from the EPaCCS template can be viewed across the local health community, via the integrated digital care record used by health and social care professionals in the CCG area, which went live at the end of February 2018. The integrated digital care record contains some of the information

1  
2  
3 held at GP practices, hospital departments, community services, mental health trusts, out of  
4 hours services and local authorities across the CCG area, combining it into a single, shared  
5 digital record.  
6  
7  
8

### 9 10 *Conceptual framework*

11  
12  
13 This study will draw on a realist evaluation approach (24). A randomised, experimental study  
14 design is not possible as the implementation of EPaCCS has been strongly advocated and  
15 promoted by NHS England, with 83% of Clinical Commissioning Groups (CCGs) in England  
16 reported to have an operational EPaCCS, or be in the planning stages, by 2013 (25). The  
17 CCG had recently operationalised an EPaCCS at the time of study design.  
18  
19  
20  
21  
22  
23  
24

25 By their nature, EPaCCS involve multiple organisations and a multidisciplinary style of  
26 work. It therefore requires a novel methodological approach to evaluation as described in this  
27 protocol.  
28  
29  
30  
31

32  
33 Realist evaluation is a theory-driven approach designed for evaluating complex interventions,  
34 such as EPaCCS, where the outcomes are influenced by the way the intervention is delivered  
35 and in what context. Due to this complexity, any evaluation of EPaCCS seeking to determine  
36 linear causal relationships or simply find out if the intervention “works” is unlikely to be  
37 useful. Pawson and Tilley (24), the developers of realistic evaluation, suggest that the results  
38 of an intervention (outcomes) are dependent on the introduction of appropriate reasoning and  
39 resources (mechanisms) and how these then interact with existing social and cultural  
40 condition (contexts). For the purposes of this study, we have defined context (C), mechanism  
41 (M) and outcome (O) in Figure 1.  
42  
43  
44  
45  
46  
47  
48  
49  
50  
51  
52  
53

### 54 **Figure 1 – Definition of Context, Mechanism and Outcome**

55  
56  
57 A realist approach acknowledges that complex interventions only ever work for certain  
58 people, in particular circumstances. The key task of a realist evaluation is to understand and  
59  
60

1  
2  
3 explain these patterns by asking the exploratory question: *what works, for whom and in what*  
4  
5 *circumstances?*  
6  
7

8 According to Pawson, interventions or “programmes”, such as the EPaCCS, are ‘theories  
9 incarnate’ and every programme has a theoretical underpinning (26). Before conducting a  
10 realist evaluation, the researchers must develop a theory, or theories, that explain what works,  
11 for whom, under what circumstances and how. This is sometimes known as the “initial  
12 programme theory” and is described through CMO conjectures. This theory, or theories, are  
13 then tested through the process of the evaluation.  
14  
15

16  
17  
18 The study will be conducted in five phases: (1) development of the initial programme theory;  
19  
20  
21  
22  
23  
24  
25  
26  
27  
28  
29  
30  
31  
32  
33  
34  
35  
36  
37  
38  
39  
40  
41  
42  
43  
44  
45  
46  
47  
48  
49  
50  
51  
52  
53  
54  
55  
56  
57  
58  
59  
60  
61  
62  
63  
64  
65  
66  
67  
68  
69  
70  
71  
72  
73  
74  
75  
76  
77  
78  
79  
80  
81  
82  
83  
84  
85  
86  
87  
88  
89  
90  
91  
92  
93  
94  
95  
96  
97  
98  
99  
100  
101  
102  
103  
104  
105  
106  
107  
108  
109  
110  
111  
112  
113  
114  
115  
116  
117  
118  
119  
120  
121  
122  
123  
124  
125  
126  
127  
128  
129  
130  
131  
132  
133  
134  
135  
136  
137  
138  
139  
140  
141  
142  
143  
144  
145  
146  
147  
148  
149  
150  
151  
152  
153  
154  
155  
156  
157  
158  
159  
160  
161  
162  
163  
164  
165  
166  
167  
168  
169  
170  
171  
172  
173  
174  
175  
176  
177  
178  
179  
180  
181  
182  
183  
184  
185  
186  
187  
188  
189  
190  
191  
192  
193  
194  
195  
196  
197  
198  
199  
200  
201  
202  
203  
204  
205  
206  
207  
208  
209  
210  
211  
212  
213  
214  
215  
216  
217  
218  
219  
220  
221  
222  
223  
224  
225  
226  
227  
228  
229  
230  
231  
232  
233  
234  
235  
236  
237  
238  
239  
240  
241  
242  
243  
244  
245  
246  
247  
248  
249  
250  
251  
252  
253  
254  
255  
256  
257  
258  
259  
260  
261  
262  
263  
264  
265  
266  
267  
268  
269  
270  
271  
272  
273  
274  
275  
276  
277  
278  
279  
280  
281  
282  
283  
284  
285  
286  
287  
288  
289  
290  
291  
292  
293  
294  
295  
296  
297  
298  
299  
300  
301  
302  
303  
304  
305  
306  
307  
308  
309  
310  
311  
312  
313  
314  
315  
316  
317  
318  
319  
320  
321  
322  
323  
324  
325  
326  
327  
328  
329  
330  
331  
332  
333  
334  
335  
336  
337  
338  
339  
340  
341  
342  
343  
344  
345  
346  
347  
348  
349  
350  
351  
352  
353  
354  
355  
356  
357  
358  
359  
360  
361  
362  
363  
364  
365  
366  
367  
368  
369  
370  
371  
372  
373  
374  
375  
376  
377  
378  
379  
380  
381  
382  
383  
384  
385  
386  
387  
388  
389  
390  
391  
392  
393  
394  
395  
396  
397  
398  
399  
400  
401  
402  
403  
404  
405  
406  
407  
408  
409  
410  
411  
412  
413  
414  
415  
416  
417  
418  
419  
420  
421  
422  
423  
424  
425  
426  
427  
428  
429  
430  
431  
432  
433  
434  
435  
436  
437  
438  
439  
440  
441  
442  
443  
444  
445  
446  
447  
448  
449  
450  
451  
452  
453  
454  
455  
456  
457  
458  
459  
460  
461  
462  
463  
464  
465  
466  
467  
468  
469  
470  
471  
472  
473  
474  
475  
476  
477  
478  
479  
480  
481  
482  
483  
484  
485  
486  
487  
488  
489  
490  
491  
492  
493  
494  
495  
496  
497  
498  
499  
500  
501  
502  
503  
504  
505  
506  
507  
508  
509  
510  
511  
512  
513  
514  
515  
516  
517  
518  
519  
520  
521  
522  
523  
524  
525  
526  
527  
528  
529  
530  
531  
532  
533  
534  
535  
536  
537  
538  
539  
540  
541  
542  
543  
544  
545  
546  
547  
548  
549  
550  
551  
552  
553  
554  
555  
556  
557  
558  
559  
560  
561  
562  
563  
564  
565  
566  
567  
568  
569  
570  
571  
572  
573  
574  
575  
576  
577  
578  
579  
580  
581  
582  
583  
584  
585  
586  
587  
588  
589  
590  
591  
592  
593  
594  
595  
596  
597  
598  
599  
600  
601  
602  
603  
604  
605  
606  
607  
608  
609  
610  
611  
612  
613  
614  
615  
616  
617  
618  
619  
620  
621  
622  
623  
624  
625  
626  
627  
628  
629  
630  
631  
632  
633  
634  
635  
636  
637  
638  
639  
640  
641  
642  
643  
644  
645  
646  
647  
648  
649  
650  
651  
652  
653  
654  
655  
656  
657  
658  
659  
660  
661  
662  
663  
664  
665  
666  
667  
668  
669  
670  
671  
672  
673  
674  
675  
676  
677  
678  
679  
680  
681  
682  
683  
684  
685  
686  
687  
688  
689  
690  
691  
692  
693  
694  
695  
696  
697  
698  
699  
700  
701  
702  
703  
704  
705  
706  
707  
708  
709  
710  
711  
712  
713  
714  
715  
716  
717  
718  
719  
720  
721  
722  
723  
724  
725  
726  
727  
728  
729  
730  
731  
732  
733  
734  
735  
736  
737  
738  
739  
740  
741  
742  
743  
744  
745  
746  
747  
748  
749  
750  
751  
752  
753  
754  
755  
756  
757  
758  
759  
760  
761  
762  
763  
764  
765  
766  
767  
768  
769  
770  
771  
772  
773  
774  
775  
776  
777  
778  
779  
780  
781  
782  
783  
784  
785  
786  
787  
788  
789  
790  
791  
792  
793  
794  
795  
796  
797  
798  
799  
800  
801  
802  
803  
804  
805  
806  
807  
808  
809  
810  
811  
812  
813  
814  
815  
816  
817  
818  
819  
820  
821  
822  
823  
824  
825  
826  
827  
828  
829  
830  
831  
832  
833  
834  
835  
836  
837  
838  
839  
840  
841  
842  
843  
844  
845  
846  
847  
848  
849  
850  
851  
852  
853  
854  
855  
856  
857  
858  
859  
860  
861  
862  
863  
864  
865  
866  
867  
868  
869  
870  
871  
872  
873  
874  
875  
876  
877  
878  
879  
880  
881  
882  
883  
884  
885  
886  
887  
888  
889  
890  
891  
892  
893  
894  
895  
896  
897  
898  
899  
900  
901  
902  
903  
904  
905  
906  
907  
908  
909  
910  
911  
912  
913  
914  
915  
916  
917  
918  
919  
920  
921  
922  
923  
924  
925  
926  
927  
928  
929  
930  
931  
932  
933  
934  
935  
936  
937  
938  
939  
940  
941  
942  
943  
944  
945  
946  
947  
948  
949  
950  
951  
952  
953  
954  
955  
956  
957  
958  
959  
960  
961  
962  
963  
964  
965  
966  
967  
968  
969  
970  
971  
972  
973  
974  
975  
976  
977  
978  
979  
980  
981  
982  
983  
984  
985  
986  
987  
988  
989  
990  
991  
992  
993  
994  
995  
996  
997  
998  
999  
1000

(2) focus group with CCG stakeholder board; (3) individual interviews with healthcare professionals (HCPs), patients, current and bereaved carers; (4) retrospective cohort study of routinely collected data on EPaCCS usage and (5) data analysis and synthesis of study findings.

***Phase one: development of the initial programme theory (June-October 2018)***

Phase one is complete and included identification of relevant literature from electronic searches of databases, such as Medline and Google Scholar. Reference lists of relevant papers were scanned, and citation searches conducted. Grey literature relating to policy and organisational-based material were sought by searching government and other specialist websites. The lead researcher’s own experiences as a General Practitioner (GP) were used as “informed guesswork” (27) and initial meetings were held with key stakeholders, including patients at the local hospice and commissioners. These initial engagements were informal and were patient and public involvement activities (detailed further below). They did not constitute formal interviews requiring ethics clearance.

1  
2  
3 The proposed implementation of EPaCCs was broken down and analysed, to understand  
4 different elements of this process (Table 1, Column 1). These elements, highlighted as  
5 important through literature searches and initial stakeholder engagement, were analysed and  
6 detailed into initial CMO statements (Table 1, Column 2). An overview of these CMO  
7 statements were then illustrated through a process diagram as illustrated in Figure 2.  
8  
9

10  
11  
12  
13  
14  
15 At an early stage of the programme theory development, the CMO conjectures were reviewed  
16 by, and discussed with, Dr Justin Jagosh, Director of the Centre for Advancement in Realist  
17 Evaluation and Synthesis.  
18  
19

20  
21  
22 The initial programme theory forms a set of hypotheses on what the mechanisms may be,  
23 what groups may benefit most or least and the contextual factors that might be important to  
24 its success or failure. These hypotheses will be interrogated and tested in phases 2-5 of the  
25 study.  
26  
27  
28  
29  
30  
31

32 **Figure 2 - Visual representation of the initial programme theory at a macro level.**  
33  
34  
35  
36  
37

38 ***Phase two: focus group with CCG stakeholder board (October 2018)***  
39

40 The CCG EOL care board is a multi-disciplinary, multi-organisational system board, whose  
41 members are high-level stakeholder representatives from across the CCG, including  
42 representatives from community nursing teams, primary care, the ambulance service (which  
43 serves a wider geographical area than the CCG area), local hospices, care homes and  
44 secondary care. The purpose of the board is to review the current commissioning across all  
45 geographical provision, ensuring unified pathways for community, primary and secondary  
46 providers to provide consistency for all patients, carers and staff across the system.  
47  
48  
49  
50  
51  
52  
53  
54  
55

56  
57 Board members will be invited to take part in a focus group following their attendance at the  
58 monthly board meeting. Focus groups allow for social interaction, which can help to reveal  
59  
60



issues and subsequent points of view that may not be prompted or discovered through individual interviews. This approach will help the study team to gain as wide an understanding as possible of the process of commissioning the EPaCCS and help to refine the initial programme theory.

Participants will be consented to take part in the study prior to the focus group by either LF or LP who will be facilitating. A topic guide will be used to steer the focus group and will enable the research team to test and refine the initial programme theory prior to commencing the in-depth interviews (see table 1).

It is anticipated that the focus group will last approximately 45 minutes and that approximately 5-10 participants will take part in it. The focus group will be audio taped and transcribed verbatim.

**Table 1: Programme theory for the EPaCCs study, comprising the 17 context, mechanism and outcome (CMO) statements that inform the programme theory, and the questions that will be used, in the focus group with the end-of-life Board, to investigate each CMO statement.**

| EPaCCs Process                       | CMOs                                                                                                                                                                                                                                     | Focus group questions                                                                                                                                                                                                                                                                                                    |
|--------------------------------------|------------------------------------------------------------------------------------------------------------------------------------------------------------------------------------------------------------------------------------------|--------------------------------------------------------------------------------------------------------------------------------------------------------------------------------------------------------------------------------------------------------------------------------------------------------------------------|
| <b>Commissioning</b>                 | 1. If the strategy behind the EPaCCS is definable, deliverable and measureable, the aim, purpose and outcomes of EPaCCS will be clear. <b>(strategy)</b>                                                                                 | <ul style="list-style-type: none"> <li>How will you evaluate EPaCCS success?</li> <li>What are the markers of success for you?</li> <li>What is the CCGs long term vision for the EPaCCS?</li> </ul>                                                                                                                     |
|                                      | 2. If HCPs engage with the EPaCCS positively on early usage and see it as an improvement on any previous EOL register, HCPs will engage positively with EPaCCS. <b>(engagement)</b>                                                      | <ul style="list-style-type: none"> <li>Given that the previous EOL register was generally not well thought of, or used, how did the CCG plan to get HCPs on board?</li> <li>How do you think the EPaCCS has been received?</li> </ul>                                                                                    |
| <b>Commissioning/Uptake/Adoption</b> | 3. If the EPaCCS is well-publicised and marketed to all stakeholders HCPs will be aware of EPaCCS, understand the aim and purpose of the EPaCCS, and will initiate an EPaCCs template and/or access an EPaCCS record. <b>(publicity)</b> | <ul style="list-style-type: none"> <li>How was the EPaCCS publicised and marketed to different groups of healthcare professionals (HCPs)? What are your views on how effective this has been?</li> <li>How aware do you think HCPs are of EPaCCS and do you think they understand its purpose and importance?</li> </ul> |
|                                      | 4. If HCPs receive sufficient support and training, so that they know how to use it, they and will initiate an EPaCCs template and/or access an EPaCCS record. <b>(training)</b>                                                         | <ul style="list-style-type: none"> <li>Can you tell us about the CCG strategy for providing training and support to different groups of HCPs in the EPaCCS rollout?</li> <li>What do you think about this, and how effective it has been?</li> </ul>                                                                     |
| <b>Uptake/Adoption</b>               | 5. If HCPs have the time and/or resources to learn a new system, an EPaCCS template will be initiated. <b>(time &amp; resources)</b>                                                                                                     | <ul style="list-style-type: none"> <li>There are a significant number of GP practices that have not initiated an EPaCCS – do you have any thoughts about why this might be?</li> </ul>                                                                                                                                   |

|                                   |                                                                                                                                                                                                                                                         |                                                                                                                                                                                                                                                                                                                                                                           |
|-----------------------------------|---------------------------------------------------------------------------------------------------------------------------------------------------------------------------------------------------------------------------------------------------------|---------------------------------------------------------------------------------------------------------------------------------------------------------------------------------------------------------------------------------------------------------------------------------------------------------------------------------------------------------------------------|
|                                   |                                                                                                                                                                                                                                                         | <ul style="list-style-type: none"> <li>Do you think all HCPs will have the time and resources (i.e. they are connected to a computer, have internet and NHS network access) to learn and new system and access EPaCCS?</li> </ul>                                                                                                                                         |
|                                   | 6. If HCPs are incentivised to use EPaCCS, an EPaCCS template will be initiated. ( <b>incentives</b> )                                                                                                                                                  | <ul style="list-style-type: none"> <li>Do HCPs have other ways of obtaining the information contained on EPaCCs?</li> <li>What might these be, and are these ways better or worse, more reliable or less reliable?</li> </ul>                                                                                                                                             |
| <b>Uptake</b>                     | 7. If the patient consents to information-sharing and storage of information about their care preferences, an EPaCCS template will be initiated. ( <b>information sharing</b> )                                                                         | <ul style="list-style-type: none"> <li>For the EPaCCS to be effective, patients must consent to information-sharing, and the storage of information.</li> <li>Did you anticipate that this would raise any issues?</li> </ul>                                                                                                                                             |
|                                   | 8. If HCPs are near to a computer, are connected to the internet and have access to the GP EMIS record, an EPaCCS template will be initiated. ( <b>access to system</b> )                                                                               | <ul style="list-style-type: none"> <li>There is a theory that because EPaCCS is an electronic record, presently only updateable by the GP on EMIS, that this will have an impact on the ability of others to access it and update it and own it. Do you see this as an issue?</li> <li>What impact do you think this might present?</li> </ul>                            |
|                                   | 9. If HCPs feel able/comfortable having advanced care planning (ACP) conversations with patients, an EPaCCS template will be initiated. ( <b>ACP conversations</b> )                                                                                    | <ul style="list-style-type: none"> <li>How do you think HCPs feel about having ACP conversations with patients?</li> <li>Research suggests that patients with non-malignant diagnoses are less likely to be added to EPaCCS.</li> <li>Do you think this is the case and if so why? Are there other patient groups who might be underrepresented on the EPaCCS?</li> </ul> |
|                                   | 10. If HCPs feel that the EPaCCS facilitates, potentially difficult, ACP conversations an EPaCCS template will be initiated. ( <b>ACP conversations</b> )                                                                                               | <ul style="list-style-type: none"> <li>Some would argue that the EPaCCS template might facilitate ACP conversations with patients – what are your thoughts on this?</li> </ul>                                                                                                                                                                                            |
|                                   | 11. If the patient is willing, and has capacity to have ACP conversations, an EPaCCS template will be initiated. ( <b>ACP conversations</b> )                                                                                                           | <ul style="list-style-type: none"> <li>Patients can only record their wishes if they are able to have a conversation with an HCP – what issues do you think this might present?</li> </ul>                                                                                                                                                                                |
| <b>Adoption</b>                   | 12. If EOLC information about a patient can be accessed more efficiently in other ways (i.e. speaking with carer or reading other sources of information) the information on the EPaCCS template may not be accessed. ( <b>single point of access</b> ) | <ul style="list-style-type: none"> <li>Are there any other sources of information that HCPs might access to establish the EOL wishes and needs of a patient and do you think they present an issue of the uptake of EPaCCS?</li> </ul>                                                                                                                                    |
|                                   | 13. If HCPs are near to a computer, are connected to the internet and have access to the NHS Network an EPaCCS template will be accessed. ( <b>access to system</b> )                                                                                   | <ul style="list-style-type: none"> <li>There is a theory that because EPaCCS is an electronic record, presently only updateable by the GP on EMIS, that this will have an impact on the ability of others to access it and update it and own it.</li> <li>Do you see this as an issue? What impact do you think this might present?</li> </ul>                            |
| <b>Adoption/Care Coordination</b> | 14. If the information does not reflect the current wishes of the patient, care may not be aligned with the patients' preferences. ( <b>patient preferences</b> )                                                                                       | <ul style="list-style-type: none"> <li>Do you feel that the EPaCCs adequately reflects patient's wishes and preferences for care?</li> </ul>                                                                                                                                                                                                                              |
|                                   | 15. If the patient does not have clear or clinically meetable preferences, or their wishes are subject to frequent change, care may not be aligned with the patient's wishes. ( <b>patient preferences</b> )                                            | <ul style="list-style-type: none"> <li>Do you feel the EPaCCS adequately reflects the patient's/carers' wishes and preferences regarding end of life care and do you feel these wishes are deliverable? If not, why might this be and what needs to be improved?</li> </ul>                                                                                               |
| <b>Care Coordination</b>          | 16. If HCPs access EPaCCS and consider the information contained within it to be trustworthy (current, relevant, detailed and useful) care will be coordinated by EPaCCs and this care will align with the patient's                                    | <ul style="list-style-type: none"> <li>Do you think the EPaCCS contains all the information HCPs need to enact their patient's wishes and coordinate their patient's care?</li> <li>Do you consider it to be current, relevant, detailed and useful? If not, why might this be and what needs to be improved?</li> </ul>                                                  |

|  |                                                                                                                                                                                                        |                                                                                                                                                                                       |
|--|--------------------------------------------------------------------------------------------------------------------------------------------------------------------------------------------------------|---------------------------------------------------------------------------------------------------------------------------------------------------------------------------------------|
|  | wishes. ( <i>trustworthiness of EPaCCS</i> )                                                                                                                                                           |                                                                                                                                                                                       |
|  | 17. If EPaCCS does not enhance or improve the care that is already being delivered care may not be coordinated by EPaCCS, consistent or reflect the patients' preferences. ( <i>patient outcomes</i> ) | <ul style="list-style-type: none"> <li>What are your thoughts on the notion that: 'The EPaCCS is not coordinating care, it is simply recording what is already being done'</li> </ul> |

***Phase three: individual interviews with healthcare professionals (HCPs), patients, current and bereaved carers (November 2018 – July 2019)***

Healthcare professionals (HCPs)

HCPs from community nursing teams, primary care, the ambulance service, the local hospices, care homes and secondary care will be invited to participate.

GPs working in practices within the CCG area will be invited to support the study and the study team will purposively sample from a list of practices, to include practices that are high-users of EPaCCS and low users of EPaCCS based on data compiled by the CCG.

The research team will purposively sample HCPs who express an interest in participating according to gender, age, and profession to ensure maximum variation in the sample. All interviews with HCPs will take place over the telephone for both pragmatic and methodological reasons. Conducting interviews over the telephone will reduce the time and cost to the study that may be involved in travelling to interviews and well-planned telephone interviews can gather the same material as those held face to face (28).

A topic guide, informed by the evolving programme theory, will be used to ensure consistency across the interviews. This will enable the research team to compare the views of each group at the stage of data analysis. Interviews will last approximately 30 minutes and it is anticipated that approximately 3-5 HCPs will be interviewed from each group (18-30 in total).

Patients, current and bereaved carers

1  
2  
3 Patients will be approached to take part in interviews through their GP surgeries or the local  
4 hospice. The research team will purposively sample from a list of practices, to include  
5  
6 practices that are high-users of EPaCCS and low users of EPaCCS based on data compiled by  
7  
8 the CCG which makes clear the number of EPaCCS templates initiated according to practice.  
9  
10 Selected practices will be asked to identify patients, aged 18 and over, receiving EOL care,  
11  
12 who they consider might be eligible to take part in the study.  
13  
14  
15

16  
17 *Inclusion criteria:*

- 18 1. Capacity to give informed consent
- 19 2. Aged 18 and over
- 20 3. Prognosis 12 months or less as identified by their GP (patient aware of this prognosis)

21  
22  
23 Potential participants will be sampled purposively to include patients across the age range,  
24  
25 with and without an EPaCCS record, with both malignant and non-malignant health  
26  
27 conditions.  
28

29  
30 To recruit patients to the study from the local hospice we will liaise with key clinical staff,  
31  
32 who will be responsible for identifying appropriate patients. Once again, potential  
33  
34 participants will be sampled purposively to include patients across the age range, with and  
35  
36 without an EPaCCS record, with both malignant and non-malignant health conditions.  
37  
38

39  
40 Alongside their own study information pack, all patients will be given a carer information  
41  
42 pack which they can choose to give to their carer if they are happy for their carer to  
43  
44 participate in the study.  
45  
46

47  
48 GPs will also be asked to identify recently bereaved carers (between 8 weeks and 6 months of  
49  
50 the death of their relative), who they consider might be eligible to take part in the study. GPs  
51  
52 will be sent details of how to perform an appropriate search within EMIS to identify potential  
53  
54 participants.  
55  
56  
57  
58  
59  
60

1  
2  
3 Interviews with carers will be conducted one-to-one with the interviewer. Interviews with  
4 patients will be conducted either one-to-one with the interviewer or in the presence of their  
5 carer, according to the wishes of the patient.  
6  
7  
8  
9

10 Interviews will last approximately 45 minutes and it is anticipated that approximately 15  
11 patients will be interviewed (10 EPaCCS patients and 5 non-EPaCCS patients) and 10 carers  
12 (to include both current and bereaved). All interviews will be audio taped and transcribed  
13 verbatim.  
14  
15  
16  
17  
18  
19

20  
21  
22  
23 ***Phase four: retrospective cohort study of routinely collected data on EPaCCS usage***  
24 ***(March 2019 – July 2019)***  
25

26  
27  
28 EMIS data will be accessed to identify all patients, aged 18 and over, who die in the CCG  
29 area between 22nd February 2018 and 21st February 2019. Agreements are in place with the  
30 CCG to obtain this data. Patients will be identified as either having an EPaCCS record  
31 (EPaCCS patient) or not (non-EPaCCS patient), using EMIS coding.  
32  
33  
34  
35  
36

37  
38 EMIS will be used to characterise both EPaCCS and non-EPaCCS patients in terms of their  
39 gender, ethnicity and postcode (as a proxy for socio-economic status according to their Index  
40 of Multiple Deprivation Score). Data will be extracted to describe:  
41  
42  
43  
44

- 45 1. The proportion of patients that die with an EPaCCS record.
- 46  
47 2. When the EPaCCS record is initiated (i.e. how many months/days prior to the  
48 patient's death), and by whom.
- 49  
50 3. How frequently the EPaCCS record is updated once opened, and who makes any  
51 changes.
- 52  
53 4. The underlying cause and place of death for EPaCCS and non-EPaCCS patients.  
54  
55  
56  
57  
58  
59  
60

- 1  
2  
3 5. The number of hospital admissions and Emergency Department attendances for  
4  
5  
6  
7  
8  
9  
10  
11  
12  
13  
14  
15  
16  
17  
18  
19  
20  
21  
22
- EPaCCS and non-EPaCCS patients in the last 12 months of life.

Descriptive data will be collected, by the CCG, on EPaCCS usage, including the number of records created by each GP surgery in the CCG area. Data from the integrated digital care record will be accessed to describe which HCPs (GPs, community nurses, hospice HCPs, ambulance HCPs and secondary care clinicians) are accessing these shared end-of-life care records.

23 ***Phase five: data analysis and synthesis of study findings (October 2018 – October 2019)***  
24

25  
26 *Quantitative methods*  
27

28  
29  
30  
31  
32  
33  
34  
35  
36  
37  
38  
39  
40  
41  
42  
43  
44

Quantitative data will be analysed using Stata v15 and reported using descriptive statistics. Within the context of this realist evaluation, we were keen to use the quantitative data to address a single hypothesis, namely whether nominal possession of an EPaCCS record was associated with increased chance of dying at home. However, logistic regression will be used to determine the adjusted odds ratio and 95% confidence intervals for the associations between having an EPaCCS record and dying at home, considering other factors of interest, including, but not limited to: age, sex, deprivation and underlying cause of death.

45  
46  
47  
48  
49  
50  
51  
52  
53  
54  
55  
56

Of approximately 8,000 deaths occurring in the CCG area over the year of study, we expect around 10% (800 deaths) of patients to have an EPaCCS (10). If the proportion of deaths occurring at home is expected to be 25% among those without an EPaCCS, we would have over 99% power to detect an absolute increase of 10% to 35% among those with an EPaCCS. The power would be about 84% if the proportion were increased by 5% to 30%.

57  
58  
59  
60

Descriptive statistics will be employed to report EPaCCS usage.

*Qualitative methods*

1  
2  
3 Data analysis will be conducted using a realist approach informed by Jackson and Kolla's  
4 realistic evaluation analysis method (29). This analytic process will involve the following  
5  
6  
7 steps:

- 10 1. Coding individual units (a discrete C, M or O) within the narratives of the interviews.
- 11  
12 2. Identifying the complex connections that link these codes together into dyads or  
13  
14 triads.
- 15  
16  
17 3. Subsuming the linked codes into themes using thematic analysis (29).
- 18  
19

20 Analysis will begin shortly after data collection starts and be ongoing and iterative. Analysis  
21 will inform further data collection: for instance, analytic insights from data gathered in earlier  
22 interviews will be used to develop and adapt the programme theory and in turn, identify any  
23 changes that need to be made to the topic guide for use during later interviews. The study will  
24 generate new programme theories to explain how the EPaCCS works, for whom, and any  
25 contextual influences and constraining factors that affect their initiation and usage. Emerging  
26 analysis and findings will be discussed with PPI representatives, to explore and clarify  
27 findings.  
28  
29

30 Qualitative and quantitative data will be collected concurrently, giving equal weight to each  
31 (30). Data will be triangulated in order to test and refine the programme theories, accepting  
32 that any findings are fallible and with time and further study new data are bound to emerge  
33 (31). The synthesised study findings will establish the potential outcomes of EPaCCS,  
34 identify the underlying mechanisms which explain how they produce these effects and  
35 highlight the key contextual factors that affect their success or failure. Recommendations can  
36 then be made for the development and implementation of EPaCCS.  
37  
38

39  
40  
41  
42  
43  
44  
45  
46  
47  
48  
49  
50  
51  
52  
53  
54  
55  
56 *Patient and Public Involvement*  
57  
58  
59  
60

1  
2  
3 To support the development of this study protocol, members of the study team (LF and LP)  
4 presented and discussed an outline proposal of this study to patients, staff and carers at the  
5 local hospice on two separate occasions in April 2018. Approximately 10 participants  
6 voluntarily took part in these, semi-structured, discussions, in which we asked specific  
7 questions concerning ethical and methodological issues. Participants were also encouraged to  
8 ask any questions. These meetings raised several important issues which have been  
9 incorporated into the design of this study. Such issues included allowing patients the choice  
10 of whether to have a carer sit alongside them during their interview and which HCPs they felt  
11 it was important that the study team spoke to, due to the involvement they had in providing  
12 care for patients. The meetings also discussed what terms, wording and questions would be  
13 acceptable to patients and carers to read and hear in the study information documents and  
14 interviews.

15  
16  
17 At the end of both meetings, patients and carers were invited to continue to support the  
18 design of the study should they wished. Two members came forward expressing a wish to be  
19 more actively involved in the study. They have kindly been involved in reviewing all the  
20 study literature, including the topic guides, study information sheets and the lay summary for  
21 this protocol. It is hoped that they will wish to continue their involvement with the study.  
22 This will include informing the content of materials for lay audiences, drawing links to  
23 groups and forums that the research team may be unaware of, and supporting the study team  
24 with the interpretation and dissemination of study findings. To ensure ongoing PPI, all  
25 patients and carers taking part in the study will be invited to support the ongoing  
26 development of the study.

## 27 28 29 30 31 32 33 34 35 36 37 38 39 40 41 42 43 44 45 46 47 48 49 50 51 52 53 54 55 56 57 **Ethics and dissemination** 58 59 60



1  
2  
3 The study has been approved by NHS South West – Frenchay Research Ethics Committee  
4  
5 (REC reference number: 18/SW/0198).  
6  
7

8 The research team will disseminate the findings to a range of stakeholders. We will draw on  
9  
10 the networks and expertise of the local CCG end-of-life care board to disseminate the  
11  
12 research outputs widely and appropriately. Key audiences include patient and carer  
13  
14 organisations, GPs and community nursing teams in primary care, ambulatory services and  
15  
16 care home staff, HCPs working in secondary palliative care services and hospices, managers  
17  
18 and directors within healthcare organisations with responsibility to provide high-quality  
19  
20 services within budget and healthcare policymakers, nationally and internationally.  
21  
22  
23  
24  
25  
26

### 27 **Acknowledgements**

28  
29 We would like to thank all the patients, carers and HCPs who helped to support the PPI in  
30  
31 development of this study.  
32

33  
34 We would also like to thank Dr Justin Jagosh, Director of the Centre for Advancement in  
35  
36 Realist Evaluation and Synthesis (<https://realistmethodology-cares.org/>), for his support and  
37  
38 guidance in developing the initial programme theory.  
39  
40  
41  
42

### 43 **Contributors**

44  
45 LP was the principal investigator for this qualitative study. LF, MF, RM and SP all  
46  
47 contributed to the development of the study protocol. LP and LF drafted this manuscript. All  
48  
49 authors contributed to the editing of the final manuscript and the refining of its intellectual  
50  
51 content.  
52  
53  
54  
55

### 56 **Funding**

1  
2  
3 LP's time is paid for by a NIHR School for Primary Care Research GP Career Progression  
4  
5 Fellowship. This fellowship funding will also meet the research costs. LF's time is paid for  
6  
7 by NIHR Research Capability Funding. MF's time is supported by the NIHR Collaboration  
8  
9 for Leadership in Applied Health Research and Care West (NIHR CLAHRC West). The  
10  
11 study is supported by the NIHR West of England Clinical Research Network. The views  
12  
13 expressed in this publication are those of the authors and not necessarily those of the NHS,  
14  
15 the National Institute for Health Research or the Department of Health and Social Care.  
16  
17  
18  
19  
20  
21

### 22 **Competing interests**

23  
24 We have read and understood BMJ policy on declaration of interests and declare that we have  
25  
26 no competing interests.  
27  
28  
29  
30  
31  
32

### 33 **References**

- 34  
35 1. National Institute for Health and Care Excellence (2004). Improving supportive and  
36  
37 palliative care for adults with cancer. Cancer service guideline [CSG4].  
38  
39
- 40 2. Palliative and end of life care Priority Setting Partnership: Putting patients, carers and  
41  
42 clinicians at the heart of palliative and end of life care research. January 2015.  
43  
44 Available at:  
45  
46 [https://www.mariecurie.org.uk/globalassets/media/documents/research/PeolcPSP\\_Final\\_Report.pdf](https://www.mariecurie.org.uk/globalassets/media/documents/research/PeolcPSP_Final_Report.pdf) (accessed 30/05/18)  
47  
48
- 49 3. Barker I, Steventon A, Deeny SR. Association between continuity of care in general  
50  
51 practice and hospital admissions for ambulatory care sensitive conditions: cross  
52  
53 sectional study of routinely collected, person level data. *BMJ* 2017;356:j84  
54  
55  
56  
57  
58  
59  
60

- 1  
2  
3 4. Schweitzer B, Blankenstein N, Deliëns L, Van Der Horst H. Out-of-hours palliative  
4 care provided by GP co-operatives in the Netherlands: A focus group study. *European*  
5  
6 *Journal of General Practice*, 2011; 17: 160–166.  
7  
8
- 9  
10 5. Hall S, Murchie P, Campbell C and Murray SA. Introducing an electronic Palliative  
11 Care Summary (ePCS) in Scotland: patient, carer and professional perspectives.  
12  
13 *Family Practice* 2012; 29:576–585.  
14
- 15 6. Richards SH, Winder R, Seamark C, Seamark D, Avery S, Gilbert J, Barwick A and  
16 Campbell JL. 2011: The experiences and needs of people seeking palliative health  
17 care out-of-hours: a qualitative study. *Primary Health Care Research & Development*  
18  
19 12(2), 165–78; available from: PM:21457601.  
20  
21
- 22 7. Leydon GM, Shergill NK, Campion-Smith C, et al. Discontinuity of care at end of  
23 life: a qualitative exploration of OOH end of life care. *BMJ Supportive & Palliative*  
24  
25 *Care* 2013;3:412-421.  
26
- 27 8. Purdy S, Lassetter G, Griffin T, Wye L. Impact of the Marie Curie Cancer Care  
28 Delivering Choice Programme in Somerset and North Somerset on place of death and  
29 hospital usage: a retrospective cohort study. *BMJ Supportive & Palliative Care*  
30  
31 2014;0:1–6.  
32
- 33 9. Asprey A, Richards SH, Wright C, Seamark C, Seamark D and Moxon J. Transferring  
34 information to an out-of-hours primary care service for patients with palliative care  
35 needs: an action research study to improve the use of handover forms. *Primary Health*  
36  
37 *Care Research & Development* 2013; 14: 7–20.  
38  
39
- 40 10. Wye L, Lassetter G, Simmonds B, Duncan L, Percival J and Purdy S. Electronic  
41 palliative care coordinating systems (EPaCCS) may not facilitate home deaths: A  
42  
43 mixed methods evaluation of end of life care in two English counties. *Journal of*  
44  
45 *Research in Nursing*, 2016, Vol. 21(2) 96–107  
46  
47  
48  
49  
50  
51  
52  
53  
54  
55  
56  
57  
58  
59  
60

- 1  
2  
3 11. National Institute for Health and Clinical Excellence (2011) End of Life Care for  
4  
5 Adults. NICE Quality Standard [QS13]  
6  
7  
8 12. Petrova M, Riley J, Abel J and Barclay S. Crash course in EPaCCS (Electronic  
9  
10 Palliative Care Coordination Systems): 8 years of successes and failures in patient  
11  
12 data sharing to learn from. *BMJ Supportive & Palliative Care* 2016;0:1–9.  
13  
14  
15 13. Ali AA, Adam R, Taylor D, et al. Use of a structured palliative care summary in  
16  
17 patients with established cancer is associated with reduced hospital admissions by  
18  
19 out-of-hours general practitioners in Grampian. *BMJ Support Palliat Care* 2013;3:452–  
20  
21 5.doi:10.1136/bmjspcare-2012-000371  
22  
23  
24 14. Turner V, Flemming K. Socioeconomic factors affecting access to preferred place of  
25  
26 death: A qualitative evidence synthesis. *Palliative medicine* 2019 Mar  
27  
28 8:0269216319835146.  
29  
30  
31 15. Department of Health (2016) Our Commitment to you for end of life care: the  
32  
33 Government Response to the Review of Choice in End of Life Care. Available at:  
34  
35 <https://assets.publishing.service.gov.uk/government/uploads/system/uploads/attachme>  
36  
37 [nt\\_data/file/536326/choice-response.pdf](https://assets.publishing.service.gov.uk/government/uploads/system/uploads/attachme) (accessed 21/03/19)  
38  
39  
40 16. Office for National Statistics. National Survey of Bereaved People (VOICES):  
41  
42 England, 2015. Available at:  
43  
44 <https://www.ons.gov.uk/peoplepopulationandcommunity/healthandsocialcare/healthca>  
45  
46 [resystem/bulletins/nationalsurveyofbereavedpeoplevoices/england2015#preferences-](https://www.ons.gov.uk/peoplepopulationandcommunity/healthandsocialcare/healthca)  
47  
48 [and-choice-at-the-end-of-life](https://www.ons.gov.uk/peoplepopulationandcommunity/healthandsocialcare/healthca) (accessed 30/05/18)  
49  
50  
51 17. Public Health England, End of Life Care Profiles. Available at:  
52  
53 <https://fingertips.phe.org.uk/profile/end-of-life> (accessed 30/05/18)  
54  
55  
56  
57  
58  
59  
60

- 1  
2  
3 18. Allsop MJ, Kite S, McDermott S, Penn N, Millares-Martin P and Bennett MI.  
4  
5 Electronic palliative care coordination systems: Devising and testing a methodology  
6  
7 for evaluating documentation, *Palliative Medicine* 2017 May; 31(5): 475–482.  
8  
9  
10 19. Fallowfield L and Jenkins V. Communicating sad, bad, and difficult news in  
11  
12 medicine. *The Lancet*, 2004;363(9405), 312-319.  
13  
14  
15 20. Gibbins J, McCoubrie R, and Forbes K. Why are newly qualified doctors unprepared  
16  
17 to care for patients at the end of life? *Medical education*;2011, 45(4), 389-399.  
18  
19  
20 21. Whole Systems Partnership. (2016) *Independent evaluation of Electronic Palliative*  
21  
22 *Care Co-ordination Systems (EPaCCS) in England: Final Report*, March 2016  
23  
24  
25 22. Wye L, Lassetter GM, Percival JF, Simmonds BAJ, Duncan LJ, Purdy S. Independent  
26  
27 Evaluation of the Marie Curie Cancer Care Delivering Choice Programme in  
28  
29 Somerset and North Somerset. Centre for Primary Health Care, Department of Social  
30  
31 and Community Medicine, The University of Bristol, 2012.  
32  
33  
34 23. NHS Digital (2015). SCCI1580: Palliative Care Co-ordination: Core Content.  
35  
36 Available at: [https://digital.nhs.uk/data-and-information/information-](https://digital.nhs.uk/data-and-information/information-standards/information-standards-and-data-collections-including-extractions/publications-and-notifications/standards-and-collections/scci1580-palliative-care-co-ordination-core-content)  
37  
38 [standards/information-standards-and-data-collections-including-](https://digital.nhs.uk/data-and-information/information-standards/information-standards-and-data-collections-including-extractions/publications-and-notifications/standards-and-collections/scci1580-palliative-care-co-ordination-core-content)  
39  
40 [extractions/publications-and-notifications/standards-and-collections/scci1580-](https://digital.nhs.uk/data-and-information/information-standards/information-standards-and-data-collections-including-extractions/publications-and-notifications/standards-and-collections/scci1580-palliative-care-co-ordination-core-content)  
41  
42 [palliative-care-co-ordination-core-content](https://digital.nhs.uk/data-and-information/information-standards/information-standards-and-data-collections-including-extractions/publications-and-notifications/standards-and-collections/scci1580-palliative-care-co-ordination-core-content) (accessed 23/01/19)  
43  
44  
45 24. Pawson R and Tilley N. Realistic Evaluation. London: Sage, 2005.  
46  
47  
48 25. National End of Life Care Intelligence Network. (2014). *Electronic Palliative Care*  
49  
50 *Co-ordination Systems (EPaCCS) in England: Survey of clinical commissioning*  
51  
52 *groups (2013)*.  
53  
54  
55 26. Pawson R. Evidence based policy: A realist perspective. London: Sage, 2006.  
56  
57  
58  
59  
60

- 1  
2  
3 27. Greenhalgh T, Wong G, Jagosh J, et al Protocol—the RAMESES II study: developing  
4 guidance and reporting standards for realist evaluation BMJ Open 2015;5:e008567.  
5  
6 doi: 10.1136/bmjopen-2015-008567  
7  
8  
9  
10 28. Sturges JE, Hanrahan KJ. Comparing telephone and face-to-face qualitative  
11 interviewing: a research note. Qual Res. 2004 Apr;4(1):107-18.  
12  
13  
14 29. Jackson SF, Kolla G. A new realistic evaluation analysis method: linked coding of  
15 context, mechanism, and outcome relationships. American Journal of Evaluation.  
16  
17 2012 Sep;33(3):339-49.  
18  
19  
20  
21 30. Hanson WE, Creswell JW, Clark VL, Petska KS, Creswell JD. Mixed methods  
22 research designs in counseling psychology. Journal of counseling psychology. 2005  
23  
24 Apr;52(2):224.  
25  
26  
27  
28 31. Emmel N, Greenhalgh J, Manzano A, Monaghan M, Dalkin S (Eds). Doing realist  
29 research. London: Sage, 2018.  
30  
31  
32  
33  
34  
35  
36  
37  
38  
39  
40  
41  
42  
43  
44  
45  
46  
47  
48  
49  
50  
51  
52  
53  
54  
55  
56  
57  
58  
59  
60

**Figure 1 – Definition of Context, Mechanism and Outcome*****Context***

Something that existed prior to the introduction of the EPaCCS, for example cultural views and beliefs around talking about death and dying and Advanced Care Planning (ACP) conversations. Contexts might also refer to the setting, (e.g. primary or secondary care) or patient characteristics (e.g. underlying diagnosis, socio-demographics, mental capacity).

***Mechanism***

The intended or unintended resources created by an intervention and the response to those resources (cognitive, emotional, motivational etc) by Healthcare Professionals (HCPs), patients and carers. Mechanisms can pertain to why HCPs and patients choose (or choose not) to utilise the EPaCCS.

***Outcome***

An outcome will define the result of the EPaCCS whether intended (did the project succeed against the criteria it set itself at the outset), and also the unplanned and/or unexpected impacts.

Informed by (24) and (26).

Figure 2 – Visual representation of the initial programme theory at a macro level. See table 1 for associated CMO statements.

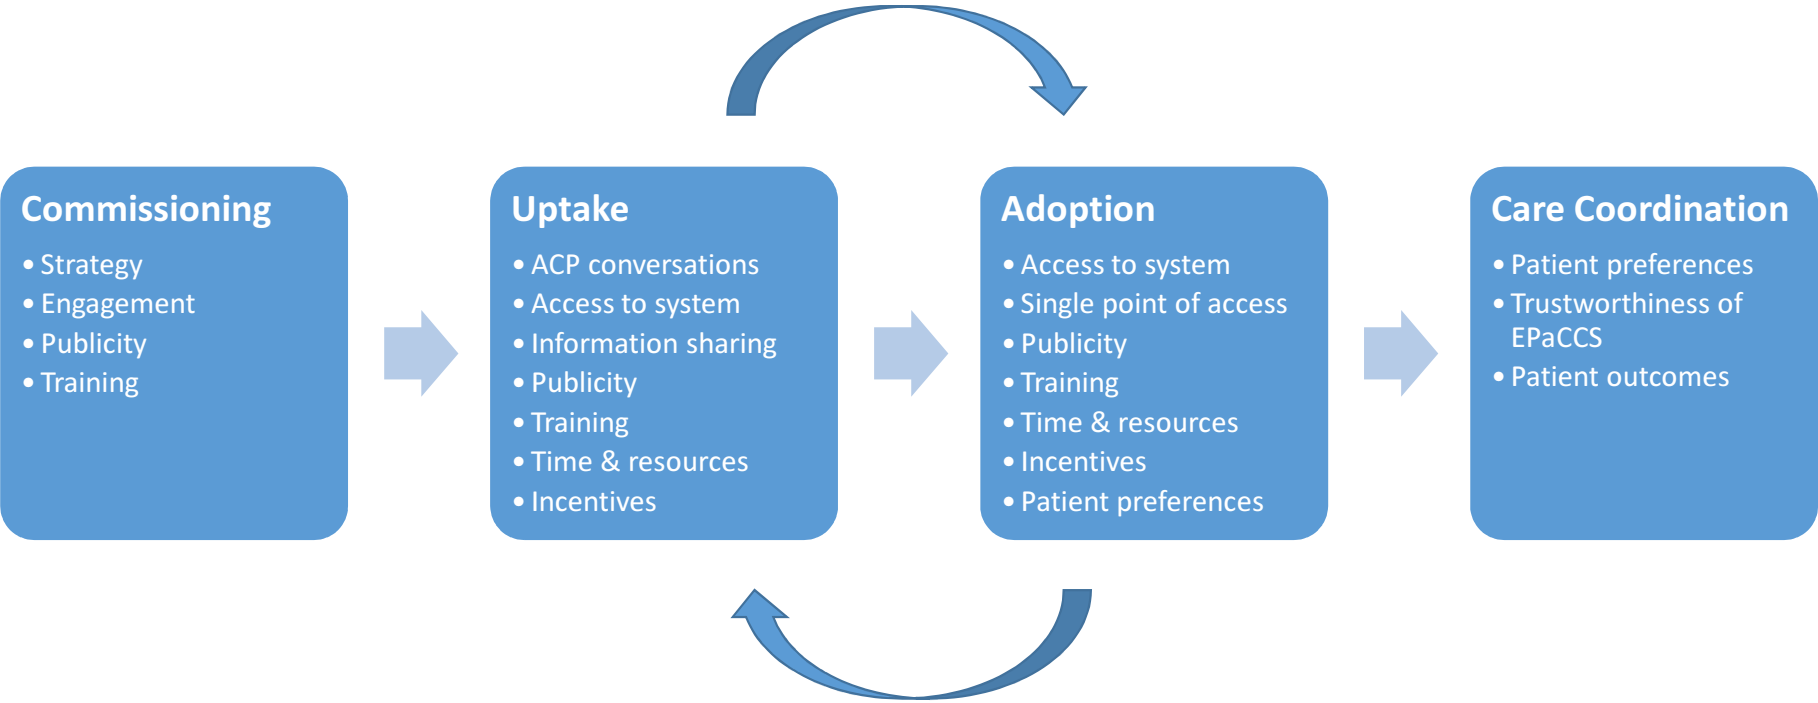



# BMJ Open

## THE IMPACT OF ELECTRONIC PALLIATIVE CARE COORDINATION SYSTEMS (EPaCCS) ON CARE AT THE END OF LIFE ACROSS MULTIPLE CARE SECTORS, IN ONE CLINICAL COMMISSIONING GROUP AREA, IN ENGLAND: A REALIST EVALUATION PROTOCOL

|                                 |                                                                                                                                                                                                                                                                                                                                                                                              |
|---------------------------------|----------------------------------------------------------------------------------------------------------------------------------------------------------------------------------------------------------------------------------------------------------------------------------------------------------------------------------------------------------------------------------------------|
| Journal:                        | <i>BMJ Open</i>                                                                                                                                                                                                                                                                                                                                                                              |
| Manuscript ID                   | bmjopen-2019-031153.R2                                                                                                                                                                                                                                                                                                                                                                       |
| Article Type:                   | Protocol                                                                                                                                                                                                                                                                                                                                                                                     |
| Date Submitted by the Author:   | 12-Nov-2019                                                                                                                                                                                                                                                                                                                                                                                  |
| Complete List of Authors:       | Pocock, Lucy; University of Bristol, Centre for Academic Primary Care<br>French, Lydia; University of Bristol, Centre for Academic Primary Care<br>Farr, Michelle; University of Bristol, NIHR CLAHRC West, Bristol Medical School<br>Morris, Richard; University of Bristol, School of Social & Community Medicine<br>Purdy, Sarah; University of Bristol, Centre for Academic Primary Care |
| <b>Primary Subject Heading</b>: | Palliative care                                                                                                                                                                                                                                                                                                                                                                              |
| Secondary Subject Heading:      | Health services research                                                                                                                                                                                                                                                                                                                                                                     |
| Keywords:                       | PALLIATIVE CARE, Quality in health care < HEALTH SERVICES ADMINISTRATION & MANAGEMENT, PRIMARY CARE, QUALITATIVE RESEARCH                                                                                                                                                                                                                                                                    |
|                                 |                                                                                                                                                                                                                                                                                                                                                                                              |

SCHOLARONE™  
Manuscripts



I, the Submitting Author has the right to grant and does grant on behalf of all authors of the Work (as defined in the below author licence), an exclusive licence and/or a non-exclusive licence for contributions from authors who are: i) UK Crown employees; ii) where BMJ has agreed a CC-BY licence shall apply, and/or iii) in accordance with the terms applicable for US Federal Government officers or employees acting as part of their official duties; on a worldwide, perpetual, irrevocable, royalty-free basis to BMJ Publishing Group Ltd ("BMJ") its licensees and where the relevant Journal is co-owned by BMJ to the co-owners of the Journal, to publish the Work in this journal and any other BMJ products and to exploit all rights, as set out in our [licence](#).

The Submitting Author accepts and understands that any supply made under these terms is made by BMJ to the Submitting Author unless you are acting as an employee on behalf of your employer or a postgraduate student of an affiliated institution which is paying any applicable article publishing charge ("APC") for Open Access articles. Where the Submitting Author wishes to make the Work available on an Open Access basis (and intends to pay the relevant APC), the terms of reuse of such Open Access shall be governed by a Creative Commons licence – details of these licences and which [Creative Commons](#) licence will apply to this Work are set out in our licence referred to above.

Other than as permitted in any relevant BMJ Author's Self Archiving Policies, I confirm this Work has not been accepted for publication elsewhere, is not being considered for publication elsewhere and does not duplicate material already published. I confirm all authors consent to publication of this Work and authorise the granting of this licence.

1  
2  
3 **THE IMPACT OF ELECTRONIC PALLIATIVE CARE COORDINATION**  
4  
5 **SYSTEMS (EPaCCS) ON CARE AT THE END OF LIFE ACROSS MULTIPLE**  
6  
7 **CARE SECTORS, IN ONE CLINICAL COMMISSIONING GROUP AREA, IN**  
8  
9 **ENGLAND: A REALIST EVALUATION PROTOCOL**  
10  
11  
12  
13  
14

15 **Corresponding author**

16  
17 Lucy V Pocock, Population Health Sciences, Bristol Medical School, University of Bristol,  
18  
19 Canynge Hall, 39 Whatley Road, Bristol, BS8 2PS  
20  
21 [Lucy.pocock@bristol.ac.uk](mailto:Lucy.pocock@bristol.ac.uk), Tel: 07810 002320  
22  
23  
24  
25

26 **Co-authors**

27  
28 Lydia R M French, Population Health Sciences, Bristol Medical School, University of  
29  
30 Bristol, Bristol, UK

31  
32  
33 Michelle Farr, The National Institute for Health Research Collaboration for Leadership in  
34  
35 Applied Health Research and Care West (NIHR CLAHRC West) at University Hospitals  
36  
37 Bristol NHS Foundation Trust, UK

38  
39  
40 Richard Morris, Population Health Sciences, Bristol Medical School, University of Bristol,  
41  
42 Bristol, UK

43  
44 Sarah Purdy, Population Health Sciences, Bristol Medical School, University of Bristol,  
45  
46 Bristol, UK,  
47  
48  
49

50  
51 Word Count: 3862  
52  
53  
54  
55  
56  
57  
58  
59  
60

## Abstract

*Introduction:* Electronic palliative care coordination systems (EPaCCS) aim to support people approaching the end-of life to receive consistent care, according to their wishes, that is coordinated effectively across multiple care sectors. They are in use across the UK although empirical evidence into their effectiveness is poor. This paper presents a protocol of a mixed-methods study, to understand how, and by whom, EPaCCS are being used and whether EPaCCS are enabling Healthcare Professionals (HCPs) to coordinate patients' end-of-life (EOL) care.

*Methods and Analysis:* This is a mixed-methods study, carried out within a realist paradigm, to evaluate the impact of an EPaCCS on EOL care as provided by a Clinical Commissioning Group (CCG) in England. This study has two aims: 1. Describe the socio-demographic characteristics of patients who die with an EPaCCS record, their underlying cause of death and place of death and compare these with patients who die without an EPaCCS record. 2. Explore the impact of an EPaCCS on the experience of receiving EOL care for patients and their carers, and understand HCPs' views and experiences of utilising an EPaCCS to coordinate care for their patients. The study will be conducted in five phases: (1) development of the initial programme theory; (2) focus group with CCG stakeholder board; (3) individual interviews with HCPs, patients, current and bereaved carers; (4) retrospective cohort study of routinely collected data on EPaCCS usage and (5) data analysis and synthesis of study findings.

*Ethics and dissemination:* The study has been approved by NHS South West – Frenchay Research Ethics Committee (REC reference number: 18/SW/0198). Findings will be published in a wide range of outputs targeted at key audiences.

### *Strengths and limitations of this study*

- Using a theory-driven realist evaluation approach, findings from this study are expected to generate contextually relevant evidence for other care coordination systems, as well as informing EPaCCS commissioning decision-making nationally.
- The study will test and refine these theories using a mixed methods approach, enhancing the credibility of the evaluation findings.
- This study addresses the need for qualitative research into the use of EPaCCS, offering much needed insight into patient and carers' experiences of EPaCCS.
- The study will investigate the impact of only one of the many EPaCCS developed and implemented in the UK.
- The qualitative component has a potentially small sample size, however, the aim of the study is not to find a robust causal mechanism for EPaCCS, but to unpack the contexts and mechanisms that work in certain circumstances.

### **Key words**

**Palliative Care, Quality in Health Care, Primary Care, Qualitative Research**

## Background

People at the end-of-life (taken here to mean in the last 12 months of life) frequently receive care from a wide variety of teams and organisations. Much of this care is accessed in the out-of-hours period (overnight and at the weekend), when they are unlikely to see a Healthcare Professional (HCP) who knows them well. Out-of-hours provision of palliative care (defined by NICE as “the active holistic care of patients with advanced, progressive illness” (1)) has been identified as a key priority for future research by the Palliative and End of Life Care Priority Setting Partnership, initiated in 2013 by Marie Curie (2). This process identified the top 10 unanswered research questions and the question with the highest priority was, “What are the best ways of providing palliative care outside of working hours to avoid crises and help patients to stay in their place of choice?”

Continuity of care is important for anyone with complex health and social care needs, but particularly for those at the end-of-life (EOL) (3). Until recently HCPs have communicated patients’ end of life care plans, to other HCPs, by means of a variety of methods, including shared end of life care registers, letters, faxes and telephone and/or face to face conversations. Despite this, a lack of information sharing has been repeatedly cited as a barrier to the provision of good quality EOL care outside of normal working hours (4,5,6). Recent studies looking at the experiences and needs of people seeking palliative care out-of-hours found that most patients expect the HCP to be able to access a summary of their complex medical history and many voiced concerns that their full record could not be accessed by out-of-hours clinicians (5,7). For some patients, lack of access to their notes is a deterrent to accessing care out-of-hours (6).

Nationally, the policy drive to address the issue of information continuity has resulted in the development of Electronic Palliative Care Coordination Systems, or EPaCCS (5,8,9,10).

These records are usually completed by the patients’ GP or community nurse, including

1  
2  
3 patients' advance care wishes, and are accessible across multiple care sectors (10). The  
4  
5 purpose of EPaCCS is to provide a shared local record for health and social care  
6  
7 professionals, with key information about an individual approaching the EOL, including their  
8  
9 expressed preferences for care. In accordance with the Quality Statements in the NICE End  
10  
11 of Life Care Standard for Adults (11) the intent is for EPaCCS to support people approaching  
12  
13 the EOL to receive consistent care that is coordinated effectively across all relevant settings.  
14  
15

16  
17 An EPaCCS record can take various forms, including web-based electronic registers, systems  
18  
19 based on sharing care summaries or care plans, alongside patients' electronic records. They  
20  
21 store a dynamic record of a patient's medical condition, treatment, wishes and preferences,  
22  
23 and provide information about the medication a patient is receiving, contact details of any  
24  
25 carers, and services involved in providing care and support to the patient.  
26  
27

28  
29 Sharing information about patients' EOL care has the potential to improve coordination and  
30  
31 communication across care settings (12). It may reduce the chance of emergency department  
32  
33 attendance, hospital admission and dying in hospital (8, 13).  
34  
35

36  
37 It is now recognised that place of death is unlikely to be the most important factor in  
38  
39 achieving a good death and a recent UK study has proposed that it is the presence of loved  
40  
41 ones that is more important than the physical location (14). However, death in preferred place  
42  
43 remains a significant measure of quality of death (15) and, according to the Voices survey of  
44  
45 bereaved people, despite 81% of respondents believing that the deceased had wanted to die at  
46  
47 home less than a quarter of people actually achieve this (16, 17).  
48  
49

50  
51 Quantitative studies have shown striking differences in place of death with EPaCCS but are  
52  
53 potentially biased and confounded (12). A more recent study challenges these assumptions,  
54  
55 suggesting that the increase in home deaths could in fact be due to selection bias (few  
56  
57 secondary care colleagues used the systems and therefore hospital deaths are not captured)  
58  
59  
60

1  
2  
3 (10). The findings of this study also underscore the importance of qualitative approaches,  
4 which can offer crucial insights into what is happening on the ground, away from broad  
5 claims of EPaCCS benefits arrived at solely through quantitative methods. Without  
6 understanding the experiences of patients and carers, together with the perspectives of HCPs,  
7 it is difficult to evaluate the effectiveness of EPaCCS (18).  
8  
9

10  
11  
12  
13  
14  
15 Technology in isolation is not guaranteed to bring benefit and the initiation of an EPaCCS  
16 relies on healthcare professionals initiating conversations about death and dying. There is  
17 evidence that these conversations are difficult for HCPs (19), with many choosing to avoid  
18 the conversation altogether (20). What impact EPaCCS has upon these conversations, if any,  
19 is not clear.  
20  
21  
22  
23  
24  
25

26  
27 A recent independent evaluation of EPaCCS found that “it was not possible to demonstrate  
28 that EPaCCS was making any difference to the care patients were receiving at the end-of-life  
29 because the range of clients for whom EPaCCS was being used remains focused on cancer,  
30 and the ability of EPaCCS systems to report on progress and outcomes remains generally  
31 poor” (21).  
32  
33  
34  
35  
36  
37  
38

39 We therefore do not know if EPaCCS acts to improve practice or whether it simply  
40 documents and reflects what is already taking place in practice (21). Indeed, the need to  
41 gather evidence of effectiveness of EPaCCS is vitally important, as it has already been widely  
42 and uncritically adopted by the NHS.  
43  
44  
45  
46  
47  
48

49 To summarise, very little research has been carried out to understand how, and by whom,  
50 EPaCCS are being used and, perhaps more importantly, whether EPaCCS are enabling HCPs  
51 to support patients’ EOL wishes. Rigorous evaluation and research are urgently needed to  
52 investigate to what extent EPaCCS influence services working together to support ‘a good  
53 death’, the outcome that stakeholders think is of most importance (22).  
54  
55  
56  
57  
58  
59  
60



## Aims, Objectives and Research Questions

The study has two aims. These are to:

1. Describe the socio-demographic characteristics of patients who die with an EPaCCS record, their underlying cause of death and place of death and compare these with patients who die without an EPaCCS record.
2. Explore the impact of an EPaCCS on the experience of receiving EOL care for patients and their carers, and understand HCPs' views and experiences of utilising an EPaCCS to provide palliative care to their patients.

## Project methodology

### *Study setting*

This study will be implemented in England, where one Clinical Commissioning Group (CCG) has recently developed and rolled out an EPaCCS. This involved the dissemination of an EMIS template, which was circulated to General Practices, to help ensure consistent data entry and coding. EMIS is the most widely used primary care clinical system in the UK and allows real-time patient information to be shared securely between different organisations.

All practices in the CCG area are EMIS users and it is now also used by the local hospice and many of the community nursing teams.

The EPaCCS template was developed following extensive local clinical consultation and the National Information Standard (23). Although some organisations within the CCG area (ambulance service, secondary and social care) are non-EMIS users, information from the EPaCCS template can be viewed across the local health community, via the integrated digital care record used by health and social care professionals in the CCG area, which went live at the end of February 2018. The integrated digital care record contains some of the information

1  
2  
3 held at GP practices, hospital departments, community services, mental health trusts, out of  
4 hours services and local authorities across the CCG area, combining it into a single, shared  
5 digital record.  
6  
7  
8

### 9 10 *Conceptual framework*

11  
12  
13 This study will draw on a realist evaluation approach (24). A randomised, experimental study  
14 design is not possible as the implementation of EPaCCS has been strongly advocated and  
15 promoted by NHS England, with 83% of Clinical Commissioning Groups (CCGs) in England  
16 reported to have an operational EPaCCS, or be in the planning stages, by 2013 (25). The  
17 CCG had recently operationalised an EPaCCS at the time of study design.  
18  
19  
20  
21  
22  
23  
24

25 By their nature, EPaCCS involve multiple organisations and a multidisciplinary style of  
26 work. It therefore requires a novel methodological approach to evaluation as described in this  
27 protocol.  
28  
29  
30  
31

32  
33 Realist evaluation is a theory-driven approach designed for evaluating complex interventions,  
34 such as EPaCCS, where the outcomes are influenced by the way the intervention is delivered  
35 and in what context. Due to this complexity, any evaluation of EPaCCS seeking to determine  
36 linear causal relationships or simply find out if the intervention “works” is unlikely to be  
37 useful. Pawson and Tilley (24), the developers of realistic evaluation, suggest that the results  
38 of an intervention (outcomes) are dependent on the introduction of appropriate reasoning and  
39 resources (mechanisms) and how these then interact with existing social and cultural  
40 condition (contexts). For the purposes of this study, we have defined context (C), mechanism  
41 (M) and outcome (O) in Figure 1.  
42  
43  
44  
45  
46  
47  
48  
49  
50  
51  
52  
53

### 54 **Figure 1 – Definition of Context, Mechanism and Outcome**

55  
56  
57 A realist approach acknowledges that complex interventions only ever work for certain  
58 people, in particular circumstances. The key task of a realist evaluation is to understand and  
59  
60

1  
2  
3 explain these patterns by asking the exploratory question: *what works, for whom and in what*  
4  
5 *circumstances?*  
6  
7

8 According to Pawson, interventions or “programmes”, such as the EPaCCS, are ‘theories  
9 incarnate’ and every programme has a theoretical underpinning (26). Before conducting a  
10 realist evaluation, the researchers must develop a theory, or theories, that explain what works,  
11 for whom, under what circumstances and how. This is sometimes known as the “initial  
12 programme theory” and is described through CMO conjectures. This theory, or theories, are  
13 then tested through the process of the evaluation.  
14  
15

16  
17  
18 The study will be conducted in five phases: (1) development of the initial programme theory;  
19 (2) focus group with CCG stakeholder board; (3) individual interviews with healthcare  
20 professionals (HCPs), patients, current and bereaved carers; (4) retrospective cohort study of  
21 routinely collected data on EPaCCS usage and (5) data analysis and synthesis of study  
22 findings.  
23  
24  
25  
26  
27  
28  
29  
30  
31  
32  
33  
34  
35  
36

### 37 ***Phase one: development of the initial programme theory (June-October 2018)***

38  
39  
40 Phase one is complete and included identification of relevant literature from electronic  
41 searches of databases, such as Medline and Google Scholar. The search strategy involved  
42 searching for papers which discussed or evaluated shared digital records, for the coordination  
43 of palliative care, end of life care, or advance care plans. Reference lists of relevant papers  
44 were scanned, and citation searches conducted. Grey literature relating to policy and  
45 organisational-based material were sought by searching government and other specialist  
46 websites. The lead researcher’s own experiences as a General Practitioner (GP) were used as  
47 “informed guesswork” (27) and initial meetings were held with key stakeholders, including  
48 patients at the local hospice and commissioners. These initial engagements were informal and  
49  
50  
51  
52  
53  
54  
55  
56  
57  
58  
59  
60

1  
2  
3 were patient and public involvement activities (detailed further below). They did not  
4  
5 constitute formal interviews requiring ethics clearance.  
6  
7

8 The proposed implementation of EPaCCs was broken down and analysed, to understand  
9  
10 different elements of this process (Table 1, Column 1). These elements, highlighted as  
11  
12 important through literature searches and initial stakeholder engagement, were analysed and  
13  
14 detailed into initial CMO statements (Table 1, Column 2). An overview of these CMO  
15  
16 statements were then illustrated through a process diagram as illustrated in Figure 2.  
17  
18

19  
20 At an early stage of the programme theory development, the CMO conjectures were reviewed  
21  
22 by, and discussed with, Dr Justin Jagosh, Director of the Centre for Advancement in Realist  
23  
24 Evaluation and Synthesis.  
25  
26

27 The initial programme theory forms a set of hypotheses on what the mechanisms may be,  
28  
29 what groups may benefit most or least and the contextual factors that might be important to  
30  
31 its success or failure. These hypotheses will be interrogated and tested in phases 2-5 of the  
32  
33 study.  
34  
35

36  
37 **Figure 2 - Visual representation of the initial programme theory at a macro level.**  
38  
39

40  
41  
42  
43 ***Phase two: focus group with CCG stakeholder board (October 2018)***  
44

45 The CCG EOL care board is a multi-disciplinary, multi-organisational system board, whose  
46  
47 members are high-level stakeholder representatives from across the CCG, including  
48  
49 representatives from community nursing teams, primary care, the ambulance service (which  
50  
51 serves a wider geographical area than the CCG area), local hospices, care homes and  
52  
53 secondary care. The purpose of the board is to review the current commissioning across all  
54  
55 geographical provision, ensuring unified pathways for community, primary and secondary  
56  
57 providers to provide consistency for all patients, carers and staff across the system.  
58  
59  
60

Board members will be invited to take part in a focus group following their attendance at the monthly board meeting. Focus groups allow for social interaction, which can help to reveal issues and subsequent points of view that may not be prompted or discovered through individual interviews. This approach will help the study team to gain as wide an understanding as possible of the process of commissioning the EPaCCS and help to refine the initial programme theory.

Participants will be consented to take part in the study prior to the focus group by either LF or LP who will be facilitating. A topic guide will be used to steer the focus group and will enable the research team to test and refine the initial programme theory prior to commencing the in-depth interviews (see table 1).

It is anticipated that the focus group will last approximately 45 minutes and that approximately 5-10 participants will take part in it. The focus group will be audio taped and transcribed verbatim.

**Table 1 - Context, mechanism and outcome (CMO) statements that comprise the programme theory, and the questions that will be used, in the focus group with the end-of-life Board, to investigate each CMO statement.**

| EPaCCs Process                       | CMOs                                                                                                                                                                                                                                     | Focus group questions                                                                                                                                                                                                                                                                                                        |
|--------------------------------------|------------------------------------------------------------------------------------------------------------------------------------------------------------------------------------------------------------------------------------------|------------------------------------------------------------------------------------------------------------------------------------------------------------------------------------------------------------------------------------------------------------------------------------------------------------------------------|
| <b>Commissioning</b>                 | 1. If the strategy behind the EPaCCs is definable, deliverable and measurable, the aim, purpose and outcomes of EPaCCS will be clear. <b>(strategy)</b>                                                                                  | <ul style="list-style-type: none"> <li>• How will you evaluate EPaCCS success?</li> <li>• What are the markers of success for you?</li> <li>• What is the CCGs long term vision for the EPaCCS?</li> </ul>                                                                                                                   |
|                                      | 2. If HCPs engage with the EPaCCS positively on early usage and see it as an improvement on any previous EOL register, HCPs will engage positively with EPaCCS. <b>(engagement)</b>                                                      | <ul style="list-style-type: none"> <li>• Given that the previous EOL register was generally not well thought of, or used, how did the CCG plan to get HCPS on board?</li> <li>• How do you think the EPaCCS has been received?</li> </ul>                                                                                    |
| <b>Commissioning/Uptake/Adoption</b> | 3. If the EPaCCS is well-publicised and marketed to all stakeholders HCPs will be aware of EPaCCS, understand the aim and purpose of the EPaCCS, and will initiate an EPaCCs template and/or access an EPaCCS record. <b>(publicity)</b> | <ul style="list-style-type: none"> <li>• How was the EPaCCS publicised and marketed to different groups of healthcare professionals (HCPS)? What are your views on how effective this has been?</li> <li>• How aware do you think HCPs are of EPaCCS and do you think they understand its purpose and importance?</li> </ul> |
|                                      | 4. If HCPs receive sufficient support and training, so that they know how to use it, they and will initiate an EPaCCs template and/or access an EPaCCS record. <b>(training)</b>                                                         | <ul style="list-style-type: none"> <li>• Can you tell us about the CCG strategy for providing training and support to different groups of HCPs in the EPaCCS rollout?</li> </ul>                                                                                                                                             |

|                                    |                                                                                                                                                                                                                                                                 |                                                                                                                                                                                                                                                                                                                                                                                     |
|------------------------------------|-----------------------------------------------------------------------------------------------------------------------------------------------------------------------------------------------------------------------------------------------------------------|-------------------------------------------------------------------------------------------------------------------------------------------------------------------------------------------------------------------------------------------------------------------------------------------------------------------------------------------------------------------------------------|
|                                    |                                                                                                                                                                                                                                                                 | <ul style="list-style-type: none"> <li>• What do you think about this, and how effective it has been?</li> </ul>                                                                                                                                                                                                                                                                    |
| <b>Uptake/Adoption</b>             | 5. If HCPs have the time and/or resources to learn a new system, an EPaCCS template will be initiated. <b>(time &amp; resources)</b>                                                                                                                            | <ul style="list-style-type: none"> <li>• There are a significant number of GP practices that have not initiated an EPaCCS – do you have any thoughts about why this might be?</li> <li>• Do you think all HCPs will have the time and resources (i.e. they are connected to a computer, have internet and NHS network access) to learn and new system and access EPaCCS?</li> </ul> |
|                                    | 6. If HCPs are incentivised to use EPaCCS, an EPaCCS template will be initiated. <b>(incentives)</b>                                                                                                                                                            | <ul style="list-style-type: none"> <li>• Do HCPs have other ways of obtaining the information contained on EPaCCs?</li> <li>• What might these be, and are these ways better or worse, more reliable or less reliable?</li> </ul>                                                                                                                                                   |
| <b>Uptake</b>                      | 7. If the patient consents to information-sharing and storage of information about their care preferences, an EPaCCS template will be initiated. <b>(information sharing)</b>                                                                                   | <ul style="list-style-type: none"> <li>• For the EPaCCS to be effective, patients must consent to information-sharing, and the storage of information.</li> <li>• Did you anticipate that this would raise any issues?</li> </ul>                                                                                                                                                   |
|                                    | 8. If HCPs are near to a computer, are connected to the internet and have access to the GP EMIS record, an EPaCCS template will be initiated. <b>(access to system)</b>                                                                                         | <ul style="list-style-type: none"> <li>• There is a theory that because EPaCCS is an electronic record, presently only updateable by the GP on EMIS, that this will have an impact on the ability of others to access it and update it and own it. Do you see this as an issue?</li> <li>• What impact do you think this might present?</li> </ul>                                  |
|                                    | 9. If HCPs feel able/comfortable having advanced care planning (ACP) conversations with patients, an EPaCCS template will be initiated. <b>(ACP conversations)</b>                                                                                              | <ul style="list-style-type: none"> <li>• How do you think HCPs feel about having ACP conversations with patients?</li> <li>• Research suggests that patients with non-malignant diagnoses are less likely to be added to EPaCCS.</li> <li>• Do you think this is the case and if so why? Are there other patient groups who might be underrepresented on the EPaCCS?</li> </ul>     |
|                                    | 10. If HCPs feel that the EPaCCS facilitates, potentially difficult, ACP conversations an EPaCCS template will be initiated. <b>(ACP conversations)</b>                                                                                                         | <ul style="list-style-type: none"> <li>• Some would argue that the EPaCCS template might facilitate ACP conversations with patients – what are your thoughts on this?</li> </ul>                                                                                                                                                                                                    |
|                                    | 11. If the patient is willing, and has capacity to have ACP conversations, an EPaCCS template will be initiated. <b>(ACP conversations)</b>                                                                                                                     | <ul style="list-style-type: none"> <li>• Patients can only record their wishes if they are able to have a conversation with an HCP – what issues do you think this might present?</li> </ul>                                                                                                                                                                                        |
| <b>Adoption</b>                    | 12. If EOLC information about a patient can be accessed more efficiently in other ways (i.e. speaking with carer or reading other sources of information) the information on the EPaCCS template may not be accessed. <b>(single point of access)</b>           | <ul style="list-style-type: none"> <li>• Are there any other sources of information that HCPs might access to establish the EOL wishes and needs of a patient and do you think they present an issue of the uptake of EPaCCS?</li> </ul>                                                                                                                                            |
|                                    | 13. If HCPs are near to a computer, are connected to the internet and have access to the NHS Network an EPaCCs template will be accessed. <b>(access to system)</b>                                                                                             | <ul style="list-style-type: none"> <li>• There is a theory that because EPaCCS is an electronic record, presently only updateable by the GP on EMIS, that this will have an impact on the ability of others to access it and update it and own it.</li> <li>• Do you see this as an issue? What impact do you think this might present?</li> </ul>                                  |
| <b>Adoption/ Care Coordination</b> | 14. If the information does not reflect the current wishes of the patient, care may not be aligned with the patients' preferences. <b>(patient preferences)</b>                                                                                                 | <ul style="list-style-type: none"> <li>• Do you feel that the EPaCCs adequately reflects patient's wishes and preferences for care?</li> </ul>                                                                                                                                                                                                                                      |
|                                    | 15. If the patient does not have clear or clinically meetable preferences, or their wishes are subject to frequent change, care may not be aligned with the patient's wishes. <b>(patient preferences)</b>                                                      | <ul style="list-style-type: none"> <li>• Do you feel the EPaCCS adequately reflects the patient's/carer's wishes and preferences regarding end of life care and do you feel these wishes are deliverable? If not, why might this be and what needs to be improved?</li> </ul>                                                                                                       |
| <b>Care Coordination</b>           | 16. If HCPs access EPaCCS and consider the information contained within it to be trustworthy (current, relevant, detailed and useful) care will be coordinated by EPaCCs and this care will align with the patient's wishes. <b>(trustworthiness of EPaCCS)</b> | <ul style="list-style-type: none"> <li>• Do you think the EPaCCS contains all the information HCPs need to enact their patient's wishes and coordinate their patient's care?</li> <li>• Do you consider it to be current, relevant, detailed and useful? If not, why might this be and what needs to be improved?</li> </ul>                                                        |

|  |                                                                                                                                                                                                        |                                                                                                                                                                                         |
|--|--------------------------------------------------------------------------------------------------------------------------------------------------------------------------------------------------------|-----------------------------------------------------------------------------------------------------------------------------------------------------------------------------------------|
|  | 17. If EPaCCS does not enhance or improve the care that is already being delivered care may not be coordinated by EPaCCS, consistent or reflect the patients' preferences. ( <i>patient outcomes</i> ) | <ul style="list-style-type: none"> <li>• What are your thoughts on the notion that: 'The EPaCCS is not coordinating care, it is simply recording what is already being done'</li> </ul> |
|--|--------------------------------------------------------------------------------------------------------------------------------------------------------------------------------------------------------|-----------------------------------------------------------------------------------------------------------------------------------------------------------------------------------------|

***Phase three: individual interviews with healthcare professionals (HCPs), patients, current and bereaved carers (November 2018 – July 2019)***

**Healthcare professionals (HCPs)**

HCPs from community nursing teams, primary care, the ambulance service, the local hospices, care homes and secondary care will be invited to participate.

GPs working in practices within the CCG area will be invited to support the study and the study team will purposively sample from a list of practices, to include practices that are high-users of EPaCCS and low users of EPaCCS based on data compiled by the CCG.

The research team will purposively sample HCPs who express an interest in participating according to gender, age, and profession to ensure maximum variation in the sample. All interviews with HCPs will take place over the telephone for both pragmatic and methodological reasons. Conducting interviews over the telephone will reduce the time and cost to the study that may be involved in travelling to interviews and well-planned telephone interviews can gather the same material as those held face to face (28).

A topic guide, informed by the evolving programme theory, will be used to ensure consistency across the interviews. This will enable the research team to compare the views of each group at the stage of data analysis. Interviews will last approximately 30 minutes and it is anticipated that approximately 3-5 HCPs will be interviewed from each group (18-30 in total).

**Patients, current and bereaved carers**

1  
2  
3 Patients will be approached to take part in interviews through their GP surgeries or the local  
4 hospice. The research team will purposively sample from a list of practices, to include  
5  
6 practices that are high-users of EPaCCS (20 or more records initiated) and low users of  
7  
8 EPaCCS (fewer than 20 records initiated) based on data compiled by the CCG which makes  
9  
10 clear the number of EPaCCS templates initiated according to practice. Selected practices will  
11  
12 be asked to identify patients, aged 18 and over, receiving EOL care, who they consider might  
13  
14 be eligible to take part in the study.  
15  
16  
17  
18

19  
20 *Inclusion criteria:*

- 21  
22  
23 1. Capacity to give informed consent  
24  
25 2. Aged 18 and over  
26  
27  
28 3. Prognosis 12 months or less as identified by their GP (patient aware of this prognosis)  
29  
30

31 Potential participants will be sampled purposively to include patients across the age range,  
32  
33 with and without an EPaCCS record, with both malignant and non-malignant health  
34  
35 conditions.  
36  
37

38 To recruit patients to the study from the local hospice we will liaise with key clinical staff,  
39  
40 who will be responsible for identifying appropriate patients. Once again, potential  
41  
42 participants will be sampled purposively to include patients across the age range, with and  
43  
44 without an EPaCCS record, with both malignant and non-malignant health conditions.  
45  
46  
47

48 Alongside their own study information pack, all patients will be given a carer information  
49  
50 pack which they can choose to give to their carer if they are happy for their carer to  
51  
52 participate in the study.  
53  
54

55 GPs will also be asked to identify recently bereaved carers (between 8 weeks and 6 months of  
56  
57 the death of their relative), who they consider might be eligible to take part in the study. GPs  
58  
59  
60



1  
2  
3 will be sent details of how to perform an appropriate search within EMIS to identify potential  
4  
5 participants.  
6  
7

8 Interviews with carers will be conducted one-to-one with the interviewer. Interviews with  
9  
10 patients will be conducted either one-to-one with the interviewer or in the presence of their  
11  
12 carer, according to the wishes of the patient.  
13  
14

15 Interviews will last approximately 45 minutes and it is anticipated that approximately 15  
16  
17 patients will be interviewed (10 EPaCCS patients and 5 non-EPaCCS patients) and 10 carers  
18  
19 (to include both current and bereaved). All interviews will be audio taped and transcribed  
20  
21 verbatim.  
22  
23  
24  
25  
26  
27

28 ***Phase four: retrospective cohort study of routinely collected data on EPaCCS usage***  
29  
30 ***(March 2019 – July 2019)***  
31  
32

33 EMIS data will be accessed to identify all patients, aged 18 and over, who die in the CCG  
34  
35 area between 22nd February 2018 and 21st February 2019. Agreements are in place with the  
36  
37 CCG to obtain this data. Patients will be identified as either having an EPaCCS record  
38  
39 (EPaCCS patient) or not (non-EPaCCS patient), using EMIS coding.  
40  
41

42 EMIS will be used to characterise both EPaCCS and non-EPaCCS patients in terms of their  
43  
44 gender, ethnicity and postcode (as a proxy for socio-economic status according to their Index  
45  
46 of Multiple Deprivation Score). Data will be extracted to describe:  
47  
48  
49

- 50 1. The proportion of patients that die with an EPaCCS record.
- 51
- 52 2. When the EPaCCS record is initiated (i.e. how many months/days prior to the  
53  
54 patient's death), and by whom.  
55  
56  
57  
58  
59  
60

- 1
- 2
- 3 3. How frequently the EPaCCS record is updated once opened, and who makes any
- 4 changes.
- 5
- 6
- 7
- 8 4. The underlying cause and place of death for EPaCCS and non-EPaCCS patients.
- 9
- 10
- 11 5. The number of hospital admissions and Emergency Department attendances for
- 12 EPaCCS and non-EPaCCS patients in the last 12 months of life.
- 13
- 14
- 15

16 Descriptive data will be collected, by the CCG, on EPaCCS usage, including the number of  
17 records created by each GP surgery in the CCG area. Data from the integrated digital care  
18 record will be accessed to describe which HCPs (GPs, community nurses, hospice HCPs,  
19 ambulance HCPs and secondary care clinicians) are accessing these shared end-of-life care  
20 records.  
21  
22  
23  
24  
25  
26  
27  
28  
29  
30

### 31 ***Phase five: data analysis and synthesis of study findings (October 2018 – October 2019)***

#### 32 *Quantitative methods*

33  
34 Quantitative data will be analysed using Stata v15 and reported using descriptive statistics.  
35  
36 Within the context of this realist evaluation, we were keen to use the quantitative data to  
37 address a single hypothesis, namely whether nominal possession of an EPaCCS record was  
38 associated with increased chance of dying at home. However, logistic regression will be used  
39 to determine the adjusted odds ratio and 95% confidence intervals for the associations  
40 between having an EPaCCS record and dying at home, considering other factors of interest,  
41 including, but not limited to: age, sex, deprivation and underlying cause of death.  
42  
43  
44  
45  
46  
47  
48  
49  
50  
51

52  
53 Of approximately 8,000 deaths occurring in the CCG area over the year of study, we expect  
54 around 10% (800 deaths) of patients to have an EPaCCS (10). If the proportion of deaths  
55 occurring at home is expected to be 25% among those without an EPaCCS, we would have  
56  
57  
58  
59  
60

1  
2  
3 over 99% power to detect an absolute increase of 10% to 35% among those with an EPaCCS.

4  
5 The power would be about 84% if the proportion were increased by 5% to 30%.

6  
7  
8 Descriptive statistics will be employed to report EPaCCS usage.

9  
10  
11 *Qualitative methods*

12  
13  
14 Data analysis will be conducted using a realist approach informed by Jackson and Kolla's  
15  
16 realistic evaluation analysis method (29). This analytic process will involve the following  
17  
18 steps:

- 19  
20  
21 1. Coding individual units (a discrete C, M or O) within the narratives of the interviews.  
22  
23 2. Identifying the complex connections that link these codes together into dyads or  
24  
25 triads.  
26  
27 3. Subsuming the linked codes into themes using thematic analysis (29).  
28  
29

30  
31 Analysis will begin shortly after data collection starts and be ongoing and iterative. Analysis  
32  
33 will inform further data collection: for instance, analytic insights from data gathered in earlier  
34  
35 interviews will be used to develop and adapt the programme theory and in turn, identify any  
36  
37 changes that need to be made to the topic guide for use during later interviews. The study will  
38  
39 generate new programme theories to explain how the EPaCCS works, for whom, and any  
40  
41 contextual influences and constraining factors that affect their initiation and usage. Emerging  
42  
43 analysis and findings will be discussed with PPI representatives, to explore and clarify  
44  
45 findings.  
46  
47

48  
49 Qualitative and quantitative data will be collected concurrently, giving equal weight to each  
50  
51 (30). Data will be triangulated in order to test and refine the programme theories, accepting  
52  
53 that any findings are fallible and with time and further study new data are bound to emerge  
54  
55 (31). The synthesised study findings will establish the potential outcomes of EPaCCS,  
56  
57 identify the underlying mechanisms which explain how they produce these effects and  
58  
59  
60

1  
2  
3 highlight the key contextual factors that affect their success or failure. Recommendations can  
4  
5 then be made for the development and implementation of EPaCCS.  
6  
7

### 8 *Patient and Public Involvement*

9

10  
11 To support the development of this study protocol, members of the study team (LF and LP)  
12  
13 presented and discussed an outline proposal of this study to patients, staff and carers at the  
14  
15 local hospice on two separate occasions in April 2018. Approximately 10 participants  
16  
17 voluntarily took part in these, semi-structured, discussions, in which we asked specific  
18  
19 questions concerning ethical and methodological issues. Participants were also encouraged to  
20  
21 ask any questions. These meetings raised several important issues which have been  
22  
23 incorporated into the design of this study. Such issues included allowing patients the choice  
24  
25 of whether to have a carer sit alongside them during their interview and which HCPs they felt  
26  
27 it was important that the study team spoke to, due to the involvement they had in providing  
28  
29 care for patients. The meetings also discussed what terms, wording and questions would be  
30  
31 acceptable to patients and carers to read and hear in the study information documents and  
32  
33 interviews.  
34  
35  
36  
37  
38

39 At the end of both meetings, patients and carers were invited to continue to support the  
40  
41 design of the study should they wished. Two members came forward expressing a wish to be  
42  
43 more actively involved in the study. They have kindly been involved in reviewing all the  
44  
45 study literature, including the topic guides, study information sheets and the lay summary for  
46  
47 this protocol. It is hoped that they will wish to continue their involvement with the study.  
48  
49 This will include informing the content of materials for lay audiences, drawing links to  
50  
51 groups and forums that the research team may be unaware of, and supporting the study team  
52  
53 with the interpretation and dissemination of study findings. To ensure ongoing PPI, all  
54  
55 patients and carers taking part in the study will be invited to support the ongoing  
56  
57 development of the study.  
58  
59  
60

## Ethics and dissemination

The study has been approved by NHS South West – Frenchay Research Ethics Committee (REC reference number: 18/SW/0198).

The research team will disseminate the findings to a range of stakeholders. We will draw on the networks and expertise of the local CCG end-of-life care board to disseminate the research outputs widely and appropriately. Key audiences include patient and carer organisations, GPs and community nursing teams in primary care, ambulatory services and care home staff, HCPs working in secondary palliative care services and hospices, managers and directors within healthcare organisations with responsibility to provide high-quality services within budget and healthcare policymakers, nationally and internationally.

## Acknowledgements

We would like to thank all the patients, carers and HCPs who helped to support the PPI in development of this study.

We would also like to thank Dr Justin Jagosh, Director of the Centre for Advancement in Realist Evaluation and Synthesis (<https://realistmethodology-cares.org/>), for his support and guidance in developing the initial programme theory.

## Contributors

LP was the principal investigator for this qualitative study. LF, MF, RM and SP all contributed to the development of the study protocol. LP and LF drafted this manuscript. All authors contributed to the editing of the final manuscript and the refining of its intellectual content.

## Funding

LP's time is paid for by a NIHR School for Primary Care Research GP Career Progression Fellowship. This fellowship funding will also meet the research costs. LF's time is paid for by NIHR Research Capability Funding. MF's time is supported by the NIHR Collaboration for Leadership in Applied Health Research and Care West (NIHR CLAHRC West). The study is supported by the NIHR West of England Clinical Research Network. The views expressed in this publication are those of the authors and not necessarily those of the NHS, the National Institute for Health Research or the Department of Health and Social Care.

## Competing interests

We have read and understood BMJ policy on declaration of interests and declare that we have no competing interests.

## References

1. National Institute for Health and Care Excellence (2004). Improving supportive and palliative care for adults with cancer. Cancer service guideline [CSG4].
2. Palliative and end of life care Priority Setting Partnership: Putting patients, carers and clinicians at the heart of palliative and end of life care research. January 2015.  
Available at:  
[https://www.mariecurie.org.uk/globalassets/media/documents/research/PeolcPSP\\_Final\\_Report.pdf](https://www.mariecurie.org.uk/globalassets/media/documents/research/PeolcPSP_Final_Report.pdf) (accessed 30/05/18)
3. Barker I, Steventon A, Deeny SR. Association between continuity of care in general practice and hospital admissions for ambulatory care sensitive conditions: cross sectional study of routinely collected, person level data. *BMJ* 2017;356:j84

- 1  
2  
3 4. Schweitzer B, Blankenstein N, Deliens L, Van Der Horst H. Out-of-hours palliative  
4 care provided by GP co-operatives in the Netherlands: A focus group study. *European*  
5  
6 *Journal of General Practice*, 2011; 17: 160–166.  
7  
8
- 9  
10 5. Hall S, Murchie P, Campbell C and Murray SA. Introducing an electronic Palliative  
11 Care Summary (ePCS) in Scotland: patient, carer and professional perspectives.  
12  
13 *Family Practice* 2012; 29:576–585.  
14
- 15 6. Richards SH, Winder R, Seamark C, Seamark D, Avery S, Gilbert J, Barwick A and  
16 Campbell JL. 2011: The experiences and needs of people seeking palliative health  
17 care out-of-hours: a qualitative study. *Primary Health Care Research & Development*  
18  
19 12(2), 165–78; available from: PM:21457601.  
20  
21
- 22 7. Leydon GM, Shergill NK, Campion-Smith C, et al. Discontinuity of care at end of  
23 life: a qualitative exploration of OOH end of life care. *BMJ Supportive & Palliative*  
24  
25 *Care* 2013;3:412-421.  
26
- 27 8. Purdy S, Lassetter G, Griffin T, Wye L. Impact of the Marie Curie Cancer Care  
28 Delivering Choice Programme in Somerset and North Somerset on place of death and  
29 hospital usage: a retrospective cohort study. *BMJ Supportive & Palliative Care*  
30  
31 2014;0:1–6.  
32
- 33 9. Asprey A, Richards SH, Wright C, Seamark C, Seamark D and Moxon J. Transferring  
34 information to an out-of-hours primary care service for patients with palliative care  
35 needs: an action research study to improve the use of handover forms. *Primary Health*  
36  
37 *Care Research & Development* 2013; 14: 7–20.  
38  
39
- 40 10. Wye L, Lassetter G, Simmonds B, Duncan L, Percival J and Purdy S. Electronic  
41 palliative care coordinating systems (EPaCCS) may not facilitate home deaths: A  
42 mixed methods evaluation of end of life care in two English counties. *Journal of*  
43  
44 *Research in Nursing*, 2016, Vol. 21(2) 96–107  
45  
46  
47  
48  
49  
50  
51  
52  
53  
54  
55  
56  
57  
58  
59  
60

- 1  
2  
3 11. National Institute for Health and Clinical Excellence (2011) End of Life Care for  
4  
5 Adults. NICE Quality Standard [QS13]  
6  
7  
8 12. Petrova M, Riley J, Abel J and Barclay S. Crash course in EPaCCS (Electronic  
9  
10 Palliative Care Coordination Systems): 8 years of successes and failures in patient  
11  
12 data sharing to learn from. *BMJ Supportive & Palliative Care* 2016;0:1–9.  
13  
14  
15 13. Ali AA, Adam R, Taylor D, et al. Use of a structured palliative care summary in  
16  
17 patients with established cancer is associated with reduced hospital admissions by  
18  
19 out-of-hours general practitioners in Grampian. *BMJ Support Palliat Care* 2013;3:452–  
20  
21 5.doi:10.1136/bmjspcare-2012-000371  
22  
23  
24 14. Turner V, Flemming K. Socioeconomic factors affecting access to preferred place of  
25  
26 death: A qualitative evidence synthesis. *Palliative medicine* 2019 Mar  
27  
28 8:0269216319835146.  
29  
30  
31 15. Department of Health (2016) Our Commitment to you for end of life care: the  
32  
33 Government Response to the Review of Choice in End of Life Care. Available at:  
34  
35 [https://assets.publishing.service.gov.uk/government/uploads/system/uploads/attachme](https://assets.publishing.service.gov.uk/government/uploads/system/uploads/attachment_data/file/536326/choice-response.pdf)  
36  
37 [nt\\_data/file/536326/choice-response.pdf](https://assets.publishing.service.gov.uk/government/uploads/system/uploads/attachment_data/file/536326/choice-response.pdf) (accessed 21/03/19)  
38  
39  
40 16. Office for National Statistics. National Survey of Bereaved People (VOICES):  
41  
42 England, 2015. Available at:  
43  
44 <https://www.ons.gov.uk/peoplepopulationandcommunity/healthandsocialcare/healthca>  
45  
46 [resystem/bulletins/nationalsurveyofbereavedpeoplevoices/england2015#preferences-](https://www.ons.gov.uk/peoplepopulationandcommunity/healthandsocialcare/healthca)  
47  
48 [and-choice-at-the-end-of-life](https://www.ons.gov.uk/peoplepopulationandcommunity/healthandsocialcare/healthca) (accessed 30/05/18)  
49  
50  
51 17. Public Health England, End of Life Care Profiles. Available at:  
52  
53 <https://fingertips.phe.org.uk/profile/end-of-life> (accessed 30/05/18)  
54  
55  
56  
57  
58  
59  
60



- 1  
2  
3 18. Allsop MJ, Kite S, McDermott S, Penn N, Millares-Martin P and Bennett MI.  
4  
5 Electronic palliative care coordination systems: Devising and testing a methodology  
6  
7 for evaluating documentation, *Palliative Medicine* 2017 May; 31(5): 475–482.  
8  
9  
10 19. Fallowfield L and Jenkins V. Communicating sad, bad, and difficult news in  
11  
12 medicine. *The Lancet*, 2004;363(9405), 312-319.  
13  
14  
15 20. Gibbins J, McCoubrie R, and Forbes K. Why are newly qualified doctors unprepared  
16  
17 to care for patients at the end of life? *Medical education*;2011, 45(4), 389-399.  
18  
19  
20 21. Whole Systems Partnership. (2016) *Independent evaluation of Electronic Palliative*  
21  
22 *Care Co-ordination Systems (EPaCCS) in England: Final Report*, March 2016  
23  
24  
25 22. Wye L, Lassetter GM, Percival JF, Simmonds BAJ, Duncan LJ, Purdy S. Independent  
26  
27 Evaluation of the Marie Curie Cancer Care Delivering Choice Programme in  
28  
29 Somerset and North Somerset. Centre for Primary Health Care, Department of Social  
30  
31 and Community Medicine, The University of Bristol, 2012.  
32  
33  
34 23. NHS Digital (2015). SCCI1580: Palliative Care Co-ordination: Core Content.  
35  
36 Available at: [https://digital.nhs.uk/data-and-information/information-](https://digital.nhs.uk/data-and-information/information-standards/information-standards-and-data-collections-including-extractions/publications-and-notifications/standards-and-collections/scci1580-palliative-care-co-ordination-core-content)  
37  
38 [standards/information-standards-and-data-collections-including-](https://digital.nhs.uk/data-and-information/information-standards/information-standards-and-data-collections-including-extractions/publications-and-notifications/standards-and-collections/scci1580-palliative-care-co-ordination-core-content)  
39  
40 [extractions/publications-and-notifications/standards-and-collections/scci1580-](https://digital.nhs.uk/data-and-information/information-standards/information-standards-and-data-collections-including-extractions/publications-and-notifications/standards-and-collections/scci1580-palliative-care-co-ordination-core-content)  
41  
42 [palliative-care-co-ordination-core-content](https://digital.nhs.uk/data-and-information/information-standards/information-standards-and-data-collections-including-extractions/publications-and-notifications/standards-and-collections/scci1580-palliative-care-co-ordination-core-content) (accessed 23/01/19)  
43  
44  
45 24. Pawson R and Tilley N. Realistic Evaluation. London: Sage, 2005.  
46  
47  
48 25. National End of Life Care Intelligence Network. (2014). *Electronic Palliative Care*  
49  
50 *Co-ordination Systems (EPaCCS) in England: Survey of clinical commissioning*  
51  
52 *groups (2013)*.  
53  
54  
55 26. Pawson R. Evidence based policy: A realist perspective. London: Sage, 2006.  
56  
57  
58  
59  
60

- 1  
2  
3 27. Greenhalgh T, Wong G, Jagosh J, et al Protocol—the RAMESES II study: developing  
4 guidance and reporting standards for realist evaluation BMJ Open 2015;5:e008567.  
5  
6 doi: 10.1136/bmjopen-2015-008567  
7  
8  
9  
10 28. Sturges JE, Hanrahan KJ. Comparing telephone and face-to-face qualitative  
11 interviewing: a research note. Qual Res. 2004 Apr;4(1):107-18.  
12  
13  
14 29. Jackson SF, Kolla G. A new realistic evaluation analysis method: linked coding of  
15 context, mechanism, and outcome relationships. American Journal of Evaluation.  
16  
17 2012 Sep;33(3):339-49.  
18  
19  
20  
21 30. Hanson WE, Creswell JW, Clark VL, Petska KS, Creswell JD. Mixed methods  
22 research designs in counseling psychology. Journal of counseling psychology. 2005  
23  
24 Apr;52(2):224.  
25  
26  
27  
28 31. Emmel N, Greenhalgh J, Manzano A, Monaghan M, Dalkin S (Eds). Doing realist  
29 research. London: Sage, 2018.  
30  
31  
32  
33  
34  
35  
36  
37  
38  
39  
40  
41  
42  
43  
44  
45  
46  
47  
48  
49  
50  
51  
52  
53  
54  
55  
56  
57  
58  
59  
60

**Figure 1 – Definition of Context, Mechanism and Outcome*****Context***

Something that existed prior to the introduction of the EPaCCS, for example cultural views and beliefs around talking about death and dying and Advanced Care Planning (ACP) conversations. Contexts might also refer to the setting, (e.g. primary or secondary care) or patient characteristics (e.g. underlying diagnosis, socio-demographics, mental capacity).

***Mechanism***

The intended or unintended resources created by an intervention and the response to those resources (cognitive, emotional, motivational etc) by Healthcare Professionals (HCPs), patients and carers. Mechanisms can pertain to why HCPs and patients choose (or choose not) to utilise the EPaCCS.

***Outcome***

An outcome will define the result of the EPaCCS whether intended (did the project succeed against the criteria it set itself at the outset), and also the unplanned and/or unexpected impacts.

Informed by (24) and (26).

Figure 2 – Visual representation of the initial programme theory at a macro level. See table 1 for associated CMO statements.

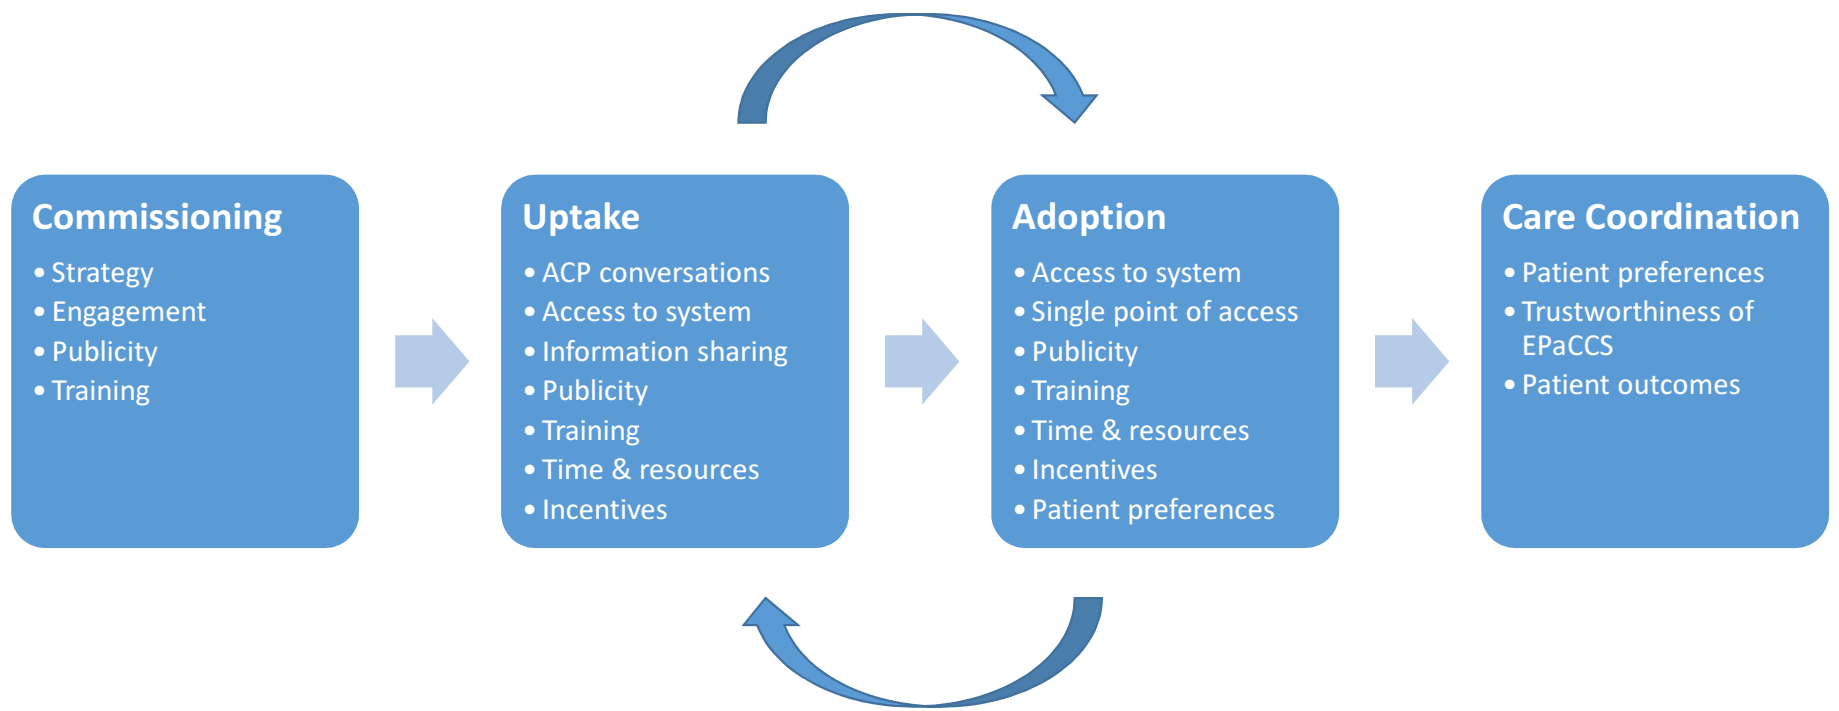

# BMJ Open

## THE IMPACT OF ELECTRONIC PALLIATIVE CARE COORDINATION SYSTEMS (EPaCCS) ON CARE AT THE END OF LIFE ACROSS MULTIPLE CARE SECTORS, IN ONE CLINICAL COMMISSIONING GROUP AREA, IN ENGLAND: A REALIST EVALUATION PROTOCOL

|                                 |                                                                                                                                                                                                                                                                                                                                                                                              |
|---------------------------------|----------------------------------------------------------------------------------------------------------------------------------------------------------------------------------------------------------------------------------------------------------------------------------------------------------------------------------------------------------------------------------------------|
| Journal:                        | <i>BMJ Open</i>                                                                                                                                                                                                                                                                                                                                                                              |
| Manuscript ID                   | bmjopen-2019-031153.R3                                                                                                                                                                                                                                                                                                                                                                       |
| Article Type:                   | Protocol                                                                                                                                                                                                                                                                                                                                                                                     |
| Date Submitted by the Author:   | 23-Jan-2020                                                                                                                                                                                                                                                                                                                                                                                  |
| Complete List of Authors:       | Pocock, Lucy; University of Bristol, Centre for Academic Primary Care<br>French, Lydia; University of Bristol, Centre for Academic Primary Care<br>Farr, Michelle; University of Bristol, NIHR CLAHRC West, Bristol Medical School<br>Morris, Richard; University of Bristol, School of Social & Community Medicine<br>Purdy, Sarah; University of Bristol, Centre for Academic Primary Care |
| <b>Primary Subject Heading</b>: | Palliative care                                                                                                                                                                                                                                                                                                                                                                              |
| Secondary Subject Heading:      | Health services research                                                                                                                                                                                                                                                                                                                                                                     |
| Keywords:                       | PALLIATIVE CARE, Quality in health care < HEALTH SERVICES ADMINISTRATION & MANAGEMENT, PRIMARY CARE, QUALITATIVE RESEARCH                                                                                                                                                                                                                                                                    |
|                                 |                                                                                                                                                                                                                                                                                                                                                                                              |

SCHOLARONE™  
Manuscripts



I, the Submitting Author has the right to grant and does grant on behalf of all authors of the Work (as defined in the below author licence), an exclusive licence and/or a non-exclusive licence for contributions from authors who are: i) UK Crown employees; ii) where BMJ has agreed a CC-BY licence shall apply, and/or iii) in accordance with the terms applicable for US Federal Government officers or employees acting as part of their official duties; on a worldwide, perpetual, irrevocable, royalty-free basis to BMJ Publishing Group Ltd ("BMJ") its licensees and where the relevant Journal is co-owned by BMJ to the co-owners of the Journal, to publish the Work in this journal and any other BMJ products and to exploit all rights, as set out in our [licence](#).

The Submitting Author accepts and understands that any supply made under these terms is made by BMJ to the Submitting Author unless you are acting as an employee on behalf of your employer or a postgraduate student of an affiliated institution which is paying any applicable article publishing charge ("APC") for Open Access articles. Where the Submitting Author wishes to make the Work available on an Open Access basis (and intends to pay the relevant APC), the terms of reuse of such Open Access shall be governed by a Creative Commons licence – details of these licences and which [Creative Commons](#) licence will apply to this Work are set out in our licence referred to above.

Other than as permitted in any relevant BMJ Author's Self Archiving Policies, I confirm this Work has not been accepted for publication elsewhere, is not being considered for publication elsewhere and does not duplicate material already published. I confirm all authors consent to publication of this Work and authorise the granting of this licence.

1  
2  
3 **THE IMPACT OF ELECTRONIC PALLIATIVE CARE COORDINATION**  
4 **SYSTEMS (EPaCCS) ON CARE AT THE END OF LIFE ACROSS MULTIPLE**  
5 **CARE SECTORS, IN ONE CLINICAL COMMISSIONING GROUP AREA, IN**  
6 **ENGLAND: A REALIST EVALUATION PROTOCOL**  
7  
8  
9  
10  
11  
12  
13  
14

15 **Corresponding author**

16  
17 Lucy V Pocock, Population Health Sciences, Bristol Medical School, University of Bristol,  
18  
19 Canynge Hall, 39 Whatley Road, Bristol, BS8 2PS  
20  
21 [Lucy.pocock@bristol.ac.uk](mailto:Lucy.pocock@bristol.ac.uk), Tel: 07810 002320  
22  
23  
24  
25

26 **Co-authors**

27  
28 Lydia R M French, Population Health Sciences, Bristol Medical School, University of  
29  
30 Bristol, Bristol, UK

31  
32  
33 Michelle Farr, The National Institute for Health Research Collaboration for Leadership in  
34  
35 Applied Health Research and Care West (NIHR CLAHRC West) at University Hospitals  
36  
37 Bristol NHS Foundation Trust, UK

38  
39  
40 Richard Morris, Population Health Sciences, Bristol Medical School, University of Bristol,  
41  
42 Bristol, UK

43  
44 Sarah Purdy, Population Health Sciences, Bristol Medical School, University of Bristol,  
45  
46 Bristol, UK,  
47  
48  
49

50  
51 Word Count: 3862  
52  
53  
54  
55  
56  
57  
58  
59  
60

## Abstract

*Introduction:* Electronic palliative care coordination systems (EPaCCS) aim to support people approaching the end-of life to receive consistent care, according to their wishes, that is coordinated effectively across multiple care sectors. They are in use across the UK although empirical evidence into their effectiveness is poor. This paper presents a protocol of a mixed-methods study, to understand how, and by whom, EPaCCS are being used and whether EPaCCS are enabling Healthcare Professionals (HCPs) to coordinate patients' end-of-life (EOL) care.

*Methods and Analysis:* This is a mixed-methods study, carried out within a realist paradigm, to evaluate the impact of an EPaCCS on EOL care as provided by a Clinical Commissioning Group (CCG) in England. This study has two aims: 1. Describe the socio-demographic characteristics of patients who die with an EPaCCS record, their underlying cause of death and place of death and compare these with patients who die without an EPaCCS record. 2. Explore the impact of an EPaCCS on the experience of receiving EOL care for patients and their carers, and understand HCPs' views and experiences of utilising an EPaCCS to coordinate care for their patients. The study will be conducted in five phases: (1) development of the initial programme theory; (2) focus group with CCG stakeholder board; (3) individual interviews with HCPs, patients, current and bereaved carers; (4) retrospective cohort study of routinely collected data on EPaCCS usage and (5) data analysis and synthesis of study findings.

*Ethics and dissemination:* The study has been approved by NHS South West – Frenchay Research Ethics Committee (REC reference number: 18/SW/0198). Findings will be published in a wide range of outputs targeted at key audiences.

### *Strengths and limitations of this study*



- Using a theory-driven realist evaluation approach, findings from this study are expected to generate contextually relevant evidence for other care coordination systems.
- The study will test and refine these theories using a mixed methods approach, enhancing the credibility of the evaluation findings.
- This study addresses the need for qualitative research into the use of EPaCCS, offering much needed insight into patient and carers' experiences of EPaCCS.
- The study will investigate the impact of only one of the many EPaCCS developed and implemented in the UK.
- The qualitative component has a potentially small sample size, however, the aim of the study is not to find a robust causal mechanism for EPaCCS, but to unpack the contexts and mechanisms that work in certain circumstances.

### **Key words**

**Palliative Care, Quality in Health Care, Primary Care, Qualitative Research**

## Background

People at the end-of-life (taken here to mean in the last 12 months of life) frequently receive care from a wide variety of teams and organisations. Much of this care is accessed in the out-of-hours period (overnight and at the weekend), when they are unlikely to see a Healthcare Professional (HCP) who knows them well. Out-of-hours provision of palliative care (defined by NICE as “the active holistic care of patients with advanced, progressive illness” (1)) has been identified as a key priority for future research by the Palliative and End of Life Care Priority Setting Partnership, initiated in 2013 by Marie Curie (2). This process identified the top 10 unanswered research questions and the question with the highest priority was, “What are the best ways of providing palliative care outside of working hours to avoid crises and help patients to stay in their place of choice?”

Continuity of care is important for anyone with complex health and social care needs, but particularly for those at the end-of-life (EOL) (3). Until recently HCPs have communicated patients’ end of life care plans, to other HCPs, by means of a variety of methods, including shared end of life care registers, letters, faxes and telephone and/or face to face conversations. Despite this, a lack of information sharing has been repeatedly cited as a barrier to the provision of good quality EOL care outside of normal working hours (4,5,6). Recent studies looking at the experiences and needs of people seeking palliative care out-of-hours found that most patients expect the HCP to be able to access a summary of their complex medical history and many voiced concerns that their full record could not be accessed by out-of-hours clinicians (5,7). For some patients, lack of access to their notes is a deterrent to accessing care out-of-hours (6).

Nationally, the policy drive to address the issue of information continuity has resulted in the development of Electronic Palliative Care Coordination Systems, or EPaCCS (5,8,9,10).

These records are usually completed by the patients’ GP or community nurse, including

1  
2  
3 patients' advance care wishes, and are accessible across multiple care sectors (10). The  
4  
5 purpose of EPaCCS is to provide a shared local record for health and social care  
6  
7 professionals, with key information about an individual approaching the EOL, including their  
8  
9 expressed preferences for care. In accordance with the Quality Statements in the NICE End  
10  
11 of Life Care Standard for Adults (11) the intent is for EPaCCS to support people approaching  
12  
13 the EOL to receive consistent care that is coordinated effectively across all relevant settings.  
14  
15

16  
17 An EPaCCS record can take various forms, including web-based electronic registers, systems  
18  
19 based on sharing care summaries or care plans, alongside patients' electronic records. They  
20  
21 store a dynamic record of a patient's medical condition, treatment, wishes and preferences,  
22  
23 and provide information about the medication a patient is receiving, contact details of any  
24  
25 carers, and services involved in providing care and support to the patient.  
26  
27

28  
29 Sharing information about patients' EOL care has the potential to improve coordination and  
30  
31 communication across care settings (12). It may reduce the chance of emergency department  
32  
33 attendance, hospital admission and dying in hospital (8, 13).  
34  
35

36  
37 It is now recognised that place of death is unlikely to be the most important factor in  
38  
39 achieving a good death and a recent UK study has proposed that it is the presence of loved  
40  
41 ones that is more important than the physical location (14). However, death in preferred place  
42  
43 remains a significant measure of quality of death (15) and, according to the Voices survey of  
44  
45 bereaved people, despite 81% of respondents believing that the deceased had wanted to die at  
46  
47 home less than a quarter of people actually achieve this (16, 17).  
48  
49

50  
51 Quantitative studies have shown striking differences in place of death with EPaCCS but are  
52  
53 potentially biased and confounded (12). A more recent study challenges these assumptions,  
54  
55 suggesting that the increase in home deaths could in fact be due to selection bias (few  
56  
57 secondary care colleagues used the systems and therefore hospital deaths are not captured)  
58  
59  
60

1  
2  
3 (10). The findings of this study also underscore the importance of qualitative approaches,  
4 which can offer crucial insights into what is happening on the ground, away from broad  
5 claims of EPaCCS benefits arrived at solely through quantitative methods. Without  
6 understanding the experiences of patients and carers, together with the perspectives of HCPs,  
7 it is difficult to evaluate the effectiveness of EPaCCS (18).  
8  
9

10  
11  
12  
13  
14  
15 Technology in isolation is not guaranteed to bring benefit and the initiation of an EPaCCS  
16 relies on healthcare professionals initiating conversations about death and dying. There is  
17 evidence that these conversations are difficult for HCPs (19), with many choosing to avoid  
18 the conversation altogether (20). What impact EPaCCS has upon these conversations, if any,  
19 is not clear.  
20  
21  
22  
23  
24  
25

26  
27 A recent independent evaluation of EPaCCS found that “it was not possible to demonstrate  
28 that EPaCCS was making any difference to the care patients were receiving at the end-of-life  
29 because the range of clients for whom EPaCCS was being used remains focused on cancer,  
30 and the ability of EPaCCS systems to report on progress and outcomes remains generally  
31 poor” (21).  
32  
33  
34  
35  
36  
37  
38

39 We therefore do not know if EPaCCS acts to improve practice or whether it simply  
40 documents and reflects what is already taking place in practice (21). Indeed, the need to  
41 gather evidence of effectiveness of EPaCCS is vitally important, as it has already been widely  
42 and uncritically adopted by the NHS.  
43  
44  
45  
46  
47  
48

49 To summarise, very little research has been carried out to understand how, and by whom,  
50 EPaCCS are being used and, perhaps more importantly, whether EPaCCS are enabling HCPs  
51 to support patients’ EOL wishes. Rigorous evaluation and research are urgently needed to  
52 investigate to what extent EPaCCS influence services working together to support ‘a good  
53 death’, the outcome that stakeholders think is of most importance (22).  
54  
55  
56  
57  
58  
59  
60

## **Aims, Objectives and Research Questions**

The study has two aims. These are to:

1. Describe the socio-demographic characteristics of patients who die with an EPaCCS record, their underlying cause of death and place of death and compare these with patients who die without an EPaCCS record.
2. Explore the impact of an EPaCCS on the experience of receiving EOL care for patients and their carers, and understand HCPs' views and experiences of utilising an EPaCCS to provide palliative care to their patients.

## **Project methodology**

### *Study setting*

This study will be implemented in England, where one Clinical Commissioning Group (CCG) has recently developed and rolled out an EPaCCS. This involved the dissemination of an EMIS template, which was circulated to General Practices, to help ensure consistent data entry and coding. EMIS is the most widely used primary care clinical system in the UK and allows real-time patient information to be shared securely between different organisations.

All practices in the CCG area are EMIS users and it is now also used by the local hospice and many of the community nursing teams.

The EPaCCS template was developed following extensive local clinical consultation and the National Information Standard (23). Although some organisations within the CCG area (ambulance service, secondary and social care) are non-EMIS users, information from the EPaCCS template can be viewed across the local health community, via the integrated digital care record used by health and social care professionals in the CCG area, which went live at the end of February 2018. The integrated digital care record contains some of the information

1  
2  
3 held at GP practices, hospital departments, community services, mental health trusts, out of  
4 hours services and local authorities across the CCG area, combining it into a single, shared  
5 digital record.  
6  
7  
8

### 9 10 *Conceptual framework*

11  
12  
13 This study will draw on a realist evaluation approach (24). A randomised, experimental study  
14 design is not possible as the implementation of EPaCCS has been strongly advocated and  
15 promoted by NHS England, with 83% of Clinical Commissioning Groups (CCGs) in England  
16 reported to have an operational EPaCCS, or be in the planning stages, by 2013 (25). The  
17 CCG had recently operationalised an EPaCCS at the time of study design.  
18  
19  
20  
21  
22  
23  
24

25 By their nature, EPaCCS involve multiple organisations and a multidisciplinary style of  
26 work. It therefore requires a novel methodological approach to evaluation as described in this  
27 protocol.  
28  
29  
30  
31

32  
33 Realist evaluation is a theory-driven approach designed for evaluating complex interventions,  
34 such as EPaCCS, where the outcomes are influenced by the way the intervention is delivered  
35 and in what context. Due to this complexity, any evaluation of EPaCCS seeking to determine  
36 linear causal relationships or simply find out if the intervention “works” is unlikely to be  
37 useful. Pawson and Tilley (24), the developers of realistic evaluation, suggest that the results  
38 of an intervention (outcomes) are dependent on the introduction of appropriate reasoning and  
39 resources (mechanisms) and how these then interact with existing social and cultural  
40 condition (contexts). For the purposes of this study, we have defined context (C), mechanism  
41 (M) and outcome (O) in Figure 1.  
42  
43  
44  
45  
46  
47  
48  
49  
50  
51  
52  
53

### 54 **Figure 1 – Definition of Context, Mechanism and Outcome**

55  
56  
57 A realist approach acknowledges that complex interventions only ever work for certain  
58 people, in particular circumstances. The key task of a realist evaluation is to understand and  
59  
60

1  
2  
3 explain these patterns by asking the exploratory question: *what works, for whom and in what*  
4  
5 *circumstances?*  
6  
7

8 According to Pawson, interventions or “programmes”, such as the EPaCCS, are ‘theories  
9 incarnate’ and every programme has a theoretical underpinning (26). Before conducting a  
10 realist evaluation, the researchers must develop a theory, or theories, that explain what works,  
11 for whom, under what circumstances and how. This is sometimes known as the “initial  
12 programme theory” and is described through CMO conjectures. This theory, or theories, are  
13 then tested through the process of the evaluation.  
14  
15  
16  
17  
18  
19  
20  
21

22 The study will be conducted in five phases: (1) development of the initial programme theory;  
23 (2) focus group with CCG stakeholder board; (3) individual interviews with healthcare  
24 professionals (HCPs), patients, current and bereaved carers; (4) retrospective cohort study of  
25 routinely collected data on EPaCCS usage and (5) data analysis and synthesis of study  
26 findings.  
27  
28  
29  
30  
31  
32  
33  
34  
35  
36

### 37 ***Phase one: development of the initial programme theory (June-October 2018)***

38  
39  
40 Phase one is complete and included identification of relevant literature from electronic  
41 searches of databases, such as Medline and Google Scholar. The search strategy involved  
42 searching for papers which discussed or evaluated shared digital records, for the coordination  
43 of palliative care, end of life care, or advance care plans. Reference lists of relevant papers  
44 were scanned, and citation searches conducted. Grey literature relating to policy and  
45 organisational-based material were sought by searching government and other specialist  
46 websites. The lead researcher’s own experiences as a General Practitioner (GP) were used as  
47 “informed guesswork” (27) and initial meetings were held with key stakeholders, including  
48 patients at the local hospice and commissioners. These initial engagements were informal and  
49  
50  
51  
52  
53  
54  
55  
56  
57  
58  
59  
60

1  
2  
3 were patient and public involvement activities (detailed further below). They did not  
4  
5 constitute formal interviews requiring ethics clearance.  
6  
7

8 The proposed implementation of EPaCCs was broken down and analysed, to understand  
9  
10 different elements of this process (Table 1, Column 1). These elements, highlighted as  
11  
12 important through literature searches and initial stakeholder engagement, were analysed and  
13  
14 detailed into initial CMO statements (Table 1, Column 2). An overview of these CMO  
15  
16 statements were then illustrated through a process diagram as illustrated in Figure 2.  
17  
18

19  
20 At an early stage of the programme theory development, the CMO conjectures were reviewed  
21  
22 by, and discussed with, Dr Justin Jagosh, Director of the Centre for Advancement in Realist  
23  
24 Evaluation and Synthesis.  
25  
26

27 The initial programme theory forms a set of hypotheses on what the mechanisms may be,  
28  
29 what groups may benefit most or least and the contextual factors that might be important to  
30  
31 its success or failure. These hypotheses will be interrogated and tested in phases 2-5 of the  
32  
33 study.  
34  
35

### 36 37 **Figure 2 - Visual representation of the initial programme theory at a macro level.**

#### 38 39 ***Phase two: focus group with CCG stakeholder board (October 2018)***

40  
41 The CCG EOL care board is a multi-disciplinary, multi-organisational system board, whose  
42  
43 members are high-level stakeholder representatives from across the CCG, including  
44  
45 representatives from community nursing teams, primary care, the ambulance service (which  
46  
47 serves a wider geographical area than the CCG area), local hospices, care homes and  
48  
49 secondary care. The purpose of the board is to review the current commissioning across all  
50  
51 geographical provision, ensuring unified pathways for community, primary and secondary  
52  
53 providers to provide consistency for all patients, carers and staff across the system.  
54  
55  
56  
57  
58  
59  
60



Board members will be invited to take part in a focus group following their attendance at the monthly board meeting. Focus groups allow for social interaction, which can help to reveal issues and subsequent points of view that may not be prompted or discovered through individual interviews. This approach will help the study team to gain as wide an understanding as possible of the process of commissioning the EPaCCS and help to refine the initial programme theory.

Participants will be consented to take part in the study prior to the focus group by either LF or LP who will be facilitating. A topic guide will be used to steer the focus group and will enable the research team to test and refine the initial programme theory prior to commencing the in-depth interviews (see table 1).

It is anticipated that the focus group will last approximately 45 minutes and that approximately 5-10 participants will take part in it. The focus group will be audio taped and transcribed verbatim.

**Table 1: Programme theory for the EPaCCs study, comprising the 17 context, mechanism and outcome (CMO) statements that inform the programme theory, and the questions that will be used, in the focus group with the end-of-life Board, to investigate each CMO statement.**

| EPaCCs Process                       | CMOs                                                                                                                                                                                                                                     | Focus group questions                                                                                                                                                                                                                                                                                                    |
|--------------------------------------|------------------------------------------------------------------------------------------------------------------------------------------------------------------------------------------------------------------------------------------|--------------------------------------------------------------------------------------------------------------------------------------------------------------------------------------------------------------------------------------------------------------------------------------------------------------------------|
| <b>Commissioning</b>                 | 1. If the strategy behind the EPaCCS is definable, deliverable and measureable, the aim, purpose and outcomes of EPaCCS will be clear. <b>(strategy)</b>                                                                                 | <ul style="list-style-type: none"> <li>How will you evaluate EPaCCS success?</li> <li>What are the markers of success for you?</li> <li>What is the CCGs long term vision for the EPaCCS?</li> </ul>                                                                                                                     |
|                                      | 2. If HCPs engage with the EPaCCS positively on early usage and see it as an improvement on any previous EOL register, HCPs will engage positively with EPaCCS. <b>(engagement)</b>                                                      | <ul style="list-style-type: none"> <li>Given that the previous EOL register was generally not well thought of, or used, how did the CCG plan to get HCPs on board?</li> <li>How do you think the EPaCCS has been received?</li> </ul>                                                                                    |
| <b>Commissioning/Uptake/Adoption</b> | 3. If the EPaCCS is well-publicised and marketed to all stakeholders HCPs will be aware of EPaCCS, understand the aim and purpose of the EPaCCS, and will initiate an EPaCCS template and/or access an EPaCCS record. <b>(publicity)</b> | <ul style="list-style-type: none"> <li>How was the EPaCCS publicised and marketed to different groups of healthcare professionals (HCPs)? What are your views on how effective this has been?</li> <li>How aware do you think HCPs are of EPaCCS and do you think they understand its purpose and importance?</li> </ul> |
|                                      | 4. If HCPs receive sufficient support and training, so that they know how to use it, they and will initiate an EPaCCS template                                                                                                           | <ul style="list-style-type: none"> <li>Can you tell us about the CCG strategy for providing training and support to different groups of HCPs in the EPaCCS rollout?</li> </ul>                                                                                                                                           |

|                                   |                                                                                                                                                                                                                                                       |                                                                                                                                                                                                                                                                                                                                                                                 |
|-----------------------------------|-------------------------------------------------------------------------------------------------------------------------------------------------------------------------------------------------------------------------------------------------------|---------------------------------------------------------------------------------------------------------------------------------------------------------------------------------------------------------------------------------------------------------------------------------------------------------------------------------------------------------------------------------|
|                                   | and/or access an EPaCCS record. <b>(training)</b>                                                                                                                                                                                                     | <ul style="list-style-type: none"> <li>What do you think about this, and how effective it has been?</li> </ul>                                                                                                                                                                                                                                                                  |
| <b>Uptake/Adoption</b>            | 5. If HCPs have the time and/or resources to learn a new system, an EPaCCS template will be initiated. <b>(time &amp; resources)</b>                                                                                                                  | <ul style="list-style-type: none"> <li>There are a significant number of GP practices that have not initiated an EPaCCS – do you have any thoughts about why this might be?</li> <li>Do you think all HCPs will have the time and resources (i.e. they are connected to a computer, have internet and NHS network access) to learn and new system and access EPaCCS?</li> </ul> |
|                                   | 6. If HCPs are incentivised to use EPaCCS, an EPaCCS template will be initiated. <b>(incentives)</b>                                                                                                                                                  | <ul style="list-style-type: none"> <li>Do HCPs have other ways of obtaining the information contained on EPaCCs?</li> <li>What might these be, and are these ways better or worse, more reliable or less reliable?</li> </ul>                                                                                                                                                   |
| <b>Uptake</b>                     | 7. If the patient consents to information-sharing and storage of information about their care preferences, an EPaCCS template will be initiated. <b>(information sharing)</b>                                                                         | <ul style="list-style-type: none"> <li>For the EPaCCS to be effective, patients must consent to information-sharing, and the storage of information.</li> <li>Did you anticipate that this would raise any issues?</li> </ul>                                                                                                                                                   |
|                                   | 8. If HCPs are near to a computer, are connected to the internet and have access to the GP EMIS record, an EPaCCS template will be initiated. <b>(access to system)</b>                                                                               | <ul style="list-style-type: none"> <li>There is a theory that because EPaCCS is an electronic record, presently only updateable by the GP on EMIS, that this will have an impact on the ability of others to access it and update it and own it. Do you see this as an issue?</li> <li>What impact do you think this might present?</li> </ul>                                  |
|                                   | 9. If HCPs feel able/comfortable having advanced care planning (ACP) conversations with patients, an EPaCCS template will be initiated. <b>(ACP conversations)</b>                                                                                    | <ul style="list-style-type: none"> <li>How do you think HCPs feel about having ACP conversations with patients?</li> <li>Research suggests that patients with non-malignant diagnoses are less likely to be added to EPaCCS.</li> <li>Do you think this is the case and if so why? Are there other patient groups who might be underrepresented on the EPaCCS?</li> </ul>       |
|                                   | 10. If HCPs feel that the EPaCCS facilitates, potentially difficult, ACP conversations an EPaCCS template will be initiated. <b>(ACP conversations)</b>                                                                                               | <ul style="list-style-type: none"> <li>Some would argue that the EPaCCS template might facilitate ACP conversations with patients – what are your thoughts on this?</li> </ul>                                                                                                                                                                                                  |
|                                   | 11. If the patient is willing, and has capacity to have ACP conversations, an EPaCCS template will be initiated. <b>(ACP conversations)</b>                                                                                                           | <ul style="list-style-type: none"> <li>Patients can only record their wishes if they are able to have a conversation with an HCP – what issues do you think this might present?</li> </ul>                                                                                                                                                                                      |
| <b>Adoption</b>                   | 12. If EOLC information about a patient can be accessed more efficiently in other ways (i.e. speaking with carer or reading other sources of information) the information on the EPaCCS template may not be accessed. <b>(single point of access)</b> | <ul style="list-style-type: none"> <li>Are there any other sources of information that HCPs might access to establish the EOL wishes and needs of a patient and do you think they present an issue of the uptake of EPaCCS?</li> </ul>                                                                                                                                          |
|                                   | 13. If HCPs are near to a computer, are connected to the internet and have access to the NHS Network an EPaCCs template will be accessed. <b>(access to system)</b>                                                                                   | <ul style="list-style-type: none"> <li>There is a theory that because EPaCCS is an electronic record, presently only updateable by the GP on EMIS, that this will have an impact on the ability of others to access it and update it and own it.</li> <li>Do you see this as an issue? What impact do you think this might present?</li> </ul>                                  |
| <b>Adoption/Care Coordination</b> | 14. If the information does not reflect the current wishes of the patient, care may not be aligned with the patients' preferences. <b>(patient preferences)</b>                                                                                       | <ul style="list-style-type: none"> <li>Do you feel that the EPaCCs adequately reflects patient's wishes and preferences for care?</li> </ul>                                                                                                                                                                                                                                    |
|                                   | 15. If the patient does not have clear or clinically meetable preferences, or their wishes are subject to frequent change, care may not be aligned with the patient's wishes. <b>(patient preferences)</b>                                            | <ul style="list-style-type: none"> <li>Do you feel the EPaCCS adequately reflects the patient's/carer's wishes and preferences regarding end of life care and do you feel these wishes are deliverable? If not, why might this be and what needs to be improved?</li> </ul>                                                                                                     |

|                   |                                                                                                                                                                                                                                                                   |                                                                                                                                                                                                                                                                                                                          |
|-------------------|-------------------------------------------------------------------------------------------------------------------------------------------------------------------------------------------------------------------------------------------------------------------|--------------------------------------------------------------------------------------------------------------------------------------------------------------------------------------------------------------------------------------------------------------------------------------------------------------------------|
| Care Coordination | 16. If HCPs access EPaCCS and consider the information contained within it to be trustworthy (current, relevant, detailed and useful) care will be coordinated by EPaCCs and this care will align with the patient's wishes. ( <i>trustworthiness of EPaCCS</i> ) | <ul style="list-style-type: none"> <li>Do you think the EPaCCS contains all the information HCPs need to enact their patient's wishes and coordinate their patient's care?</li> <li>Do you consider it to be current, relevant, detailed and useful? If not, why might this be and what needs to be improved?</li> </ul> |
|                   | 17. If EPaCCS does not enhance or improve the care that is already being delivered care may not be coordinated by EPaCCS, consistent or reflect the patients' preferences. ( <i>patient outcomes</i> )                                                            | <ul style="list-style-type: none"> <li>What are your thoughts on the notion that: 'The EPaCCS is not coordinating care, it is simply recording what is already being done'</li> </ul>                                                                                                                                    |

***Phase three: individual interviews with healthcare professionals (HCPs), patients, current and bereaved carers (November 2018 – July 2019)***

Healthcare professionals (HCPs)

HCPs from community nursing teams, primary care, the ambulance service, the local hospices, care homes and secondary care will be invited to participate.

GPs working in practices within the CCG area will be invited to support the study and the study team will purposively sample from a list of practices, to include practices that are high-users of EPaCCS and low users of EPaCCS based on data compiled by the CCG.

The research team will purposively sample HCPs who express an interest in participating according to gender, age, and profession to ensure maximum variation in the sample. All interviews with HCPs will take place over the telephone for both pragmatic and methodological reasons. Conducting interviews over the telephone will reduce the time and cost to the study that may be involved in travelling to interviews and well-planned telephone interviews can gather the same material as those held face to face (28).

A topic guide, informed by the evolving programme theory, will be used to ensure consistency across the interviews. This will enable the research team to compare the views of each group at the stage of data analysis. Interviews will last approximately 30 minutes and it

1  
2  
3 is anticipated that approximately 3-5 HCPs will be interviewed from each group (18-30 in  
4  
5 total).  
6  
7

#### 8 Patients, current and bereaved carers 9

10  
11 Patients will be approached to take part in interviews through their GP surgeries or the local  
12 hospice. The research team will purposively sample from a list of practices, to include  
13 practices that are high-users of EPaCCS and low users of EPaCCS. High EPaCCS use will be  
14 defined as practices that have created greater than 20 EPaCCS records (the median number of  
15 records across all practices) 4 months post-implementation, based on data extracted by the  
16 CCG. Selected practices will be asked to identify patients, aged 18 and over, receiving EOL  
17 care, who they consider might be eligible to take part in the study.  
18  
19  
20  
21  
22  
23  
24  
25  
26  
27

#### 28 *Inclusion criteria:* 29

- 30 1. Capacity to give informed consent
- 31  
32 2. Aged 18 and over
- 33  
34  
35 3. Prognosis 12 months or less as identified by their GP (patient aware of this prognosis)  
36  
37  
38

39 Potential participants will be sampled purposively to include patients across the age range,  
40 with and without an EPaCCS record, with both malignant and non-malignant health  
41 conditions.  
42  
43  
44  
45

46 To recruit patients to the study from the local hospice we will liaise with key clinical staff,  
47 who will be responsible for identifying appropriate patients. Once again, potential  
48 participants will be sampled purposively to include patients across the age range, with and  
49 without an EPaCCS record, with both malignant and non-malignant health conditions.  
50  
51  
52  
53  
54  
55  
56  
57  
58  
59  
60

1  
2  
3 Alongside their own study information pack, all patients will be given a carer information  
4 pack which they can choose to give to their carer if they are happy for their carer to  
5 participate in the study.  
6  
7  
8  
9

10 GPs will also be asked to identify recently bereaved carers (between 8 weeks and 6 months of  
11 the death of their relative), who they consider might be eligible to take part in the study. GPs  
12 will be sent details of how to perform an appropriate search within EMIS to identify potential  
13 participants.  
14  
15  
16  
17  
18  
19

20 Interviews with carers will be conducted one-to-one with the interviewer. Interviews with  
21 patients will be conducted either one-to-one with the interviewer or in the presence of their  
22 carer, according to the wishes of the patient.  
23  
24  
25  
26  
27

28 Interviews will last approximately 45 minutes and it is anticipated that approximately 15  
29 patients will be interviewed (10 EPaCCS patients and 5 non-EPaCCS patients) and 10 carers  
30 (to include both current and bereaved). All interviews will be audio taped and transcribed  
31 verbatim.  
32  
33  
34  
35  
36  
37  
38  
39

40 ***Phase four: retrospective cohort study of routinely collected data on EPaCCS usage***  
41 ***(March 2019 – July 2019)***  
42  
43  
44

45 EMIS data will be accessed to identify all patients, aged 18 and over, who die in the CCG  
46 area between 22nd February 2018 and 21st February 2019. Agreements are in place with the  
47 CCG to obtain this data. Patients will be identified as either having an EPaCCS record  
48 (EPaCCS patient) or not (non-EPaCCS patient), using EMIS coding.  
49  
50  
51  
52  
53  
54

55 EMIS will be used to characterise both EPaCCS and non-EPaCCS patients in terms of their  
56 gender, ethnicity and postcode (as a proxy for socio-economic status according to their Index  
57 of Multiple Deprivation Score). Data will be extracted to describe:  
58  
59  
60

- 1
- 2
- 3 1. The proportion of patients that die with an EPaCCS record.
- 4
- 5
- 6 2. When the EPaCCS record is initiated (i.e. how many months/days prior to the
- 7 patient's death), and by whom.
- 8
- 9
- 10
- 11 3. How frequently the EPaCCS record is updated once opened, and who makes any
- 12 changes.
- 13
- 14
- 15
- 16 4. The underlying cause and place of death for EPaCCS and non-EPaCCS patients.
- 17
- 18
- 19 5. The number of hospital admissions and Emergency Department attendances for
- 20 EPaCCS and non-EPaCCS patients in the last 12 months of life.
- 21
- 22
- 23

24 Descriptive data will be collected, by the CCG, on EPaCCS usage, including the number of  
25 records created by each GP surgery in the CCG area. Data from the integrated digital care  
26 record will be accessed to describe which HCPs (GPs, community nurses, hospice HCPs,  
27 ambulance HCPs and secondary care clinicians) are accessing these shared end-of-life care  
28 records.  
29  
30  
31  
32  
33  
34  
35  
36  
37  
38

### 39 ***Phase five: data analysis and synthesis of study findings (October 2018 – October 2019)***

#### 40 *Quantitative methods*

41  
42 Quantitative data will be analysed using Stata v15 and reported using descriptive statistics.  
43  
44 Within the context of this realist evaluation, we were keen to use the quantitative data to  
45 address a single hypothesis, namely whether nominal possession of an EPaCCS record was  
46 associated with increased chance of dying at home. However, logistic regression will be used  
47 to determine the adjusted odds ratio and 95% confidence intervals for the associations  
48 between having an EPaCCS record and dying at home, considering other factors of interest,  
49 including, but not limited to: age, sex, deprivation and underlying cause of death.  
50  
51  
52  
53  
54  
55  
56  
57  
58  
59  
60

1  
2  
3 Of approximately 8,000 deaths occurring in the CCG area over the year of study, we expect  
4 around 10% (800 deaths) of patients to have an EPaCCS (10). If the proportion of deaths  
5 occurring at home is expected to be 25% among those without an EPaCCS, we would have  
6 over 99% power to detect an absolute increase of 10% to 35% among those with an EPaCCS.  
7  
8 The power would be about 84% if the proportion were increased by 5% to 30%.

9  
10  
11  
12  
13  
14  
15 Descriptive statistics will be employed to report EPaCCS usage.

### 16 17 18 *Qualitative methods*

19  
20  
21 Data analysis will be conducted using a realist approach informed by Jackson and Kolla's  
22 realistic evaluation analysis method (29). This analytic process will involve the following  
23 steps:  
24  
25

- 26  
27  
28 1. Coding individual units (a discrete C, M or O) within the narratives of the interviews.
- 29  
30  
31 2. Identifying the complex connections that link these codes together into dyads or  
32 triads.
- 33  
34  
35 3. Subsuming the linked codes into themes using thematic analysis (30).

36  
37  
38 Analysis will begin shortly after data collection starts and be ongoing and iterative. Analysis  
39 will inform further data collection: for instance, analytic insights from data gathered in earlier  
40 interviews will be used to develop and adapt the programme theory and in turn, identify any  
41 changes that need to be made to the topic guide for use during later interviews. The study will  
42 generate new programme theories to explain how the EPaCCS works, for whom, and any  
43 contextual influences and constraining factors that affect their initiation and usage. Emerging  
44 analysis and findings will be discussed with PPI representatives, to explore and clarify  
45 findings.  
46  
47  
48  
49  
50  
51  
52  
53  
54

55  
56  
57 Qualitative and quantitative data will be collected concurrently, giving equal weight to each  
58 (30). Data will be triangulated in order to test and refine the programme theories, accepting  
59  
60

1  
2  
3 that any findings are fallible and with time and further study new data are bound to emerge  
4  
5 (31). The synthesised study findings will establish the potential outcomes of EPaCCS,  
6  
7 identify the underlying mechanisms which explain how they produce these effects and  
8  
9 highlight the key contextual factors that affect their success or failure. Recommendations can  
10  
11 then be made for the development and implementation of EPaCCS.  
12  
13

#### 14 15 *Patient and Public Involvement* 16

17  
18 To support the development of this study protocol, members of the study team (LF and LP)  
19  
20 presented and discussed an outline proposal of this study to patients, staff and carers at the  
21  
22 local hospice on two separate occasions in April 2018. Approximately 10 participants  
23  
24 voluntarily took part in these, semi-structured, discussions, in which we asked specific  
25  
26 questions concerning ethical and methodological issues. Participants were also encouraged to  
27  
28 ask any questions. These meetings raised several important issues which have been  
29  
30 incorporated into the design of this study. Such issues included allowing patients the choice  
31  
32 of whether to have a carer sit alongside them during their interview and which HCPs they felt  
33  
34 it was important that the study team spoke to, due to the involvement they had in providing  
35  
36 care for patients. The meetings also discussed what terms, wording and questions would be  
37  
38 acceptable to patients and carers to read and hear in the study information documents and  
39  
40 interviews.  
41  
42  
43  
44  
45

46 At the end of both meetings, patients and carers were invited to continue to support the  
47  
48 design of the study should they wished. Two members came forward expressing a wish to be  
49  
50 more actively involved in the study. They have kindly been involved in reviewing all the  
51  
52 study literature, including the topic guides, study information sheets and the lay summary for  
53  
54 this protocol. It is hoped that they will wish to continue their involvement with the study.  
55  
56 This will include informing the content of materials for lay audiences, drawing links to  
57  
58 groups and forums that the research team may be unaware of, and supporting the study team  
59  
60



1  
2  
3 with the interpretation and dissemination of study findings. To ensure ongoing PPI, all  
4 patients and carers taking part in the study will be invited to support the ongoing  
5 development of the study.  
6  
7  
8  
9

### 10 11 12 **Ethics and dissemination**

13  
14  
15 The study has been approved by NHS South West – Frenchay Research Ethics Committee  
16 (REC reference number: 18/SW/0198).  
17

18  
19  
20 The research team will disseminate the findings to a range of stakeholders. We will draw on  
21 the networks and expertise of the local CCG end-of-life care board to disseminate the  
22 research outputs widely and appropriately. Key audiences include patient and carer  
23 organisations, GPs and community nursing teams in primary care, ambulatory services and  
24 care home staff, HCPs working in secondary palliative care services and hospices, managers  
25 and directors within healthcare organisations with responsibility to provide high-quality  
26 services within budget and healthcare policymakers, nationally and internationally.  
27  
28  
29  
30  
31  
32  
33  
34  
35  
36  
37  
38

### 39 **Acknowledgements**

40  
41 We would like to thank all the patients, carers and HCPs who helped to support the PPI in  
42 development of this study.  
43

44  
45 We would also like to thank Dr Justin Jagosh, Director of the Centre for Advancement in  
46 Realist Evaluation and Synthesis (<https://realistmethodology-cares.org/>), for his support and  
47 guidance in developing the initial programme theory.  
48  
49  
50  
51  
52  
53  
54

### 55 **Contributors**

56  
57 LP was the principal investigator for this qualitative study. LF, MF, RM and SP all  
58 contributed to the development of the study protocol. LP and LF drafted this manuscript. All  
59  
60

1  
2  
3 authors contributed to the editing of the final manuscript and the refining of its intellectual  
4  
5 content.  
6  
7  
8  
9

## 10 **Funding**

11  
12 LP's time is paid for by a NIHR School for Primary Care Research GP Career Progression  
13  
14 Fellowship. This fellowship funding will also meet the research costs. LF's time is paid for  
15  
16 by NIHR Research Capability Funding. MF's time is supported by the NIHR Collaboration  
17  
18 for Leadership in Applied Health Research and Care West (NIHR CLAHRC West). The  
19  
20 study is supported by the NIHR West of England Clinical Research Network. The views  
21  
22 expressed in this publication are those of the authors and not necessarily those of the NHS,  
23  
24 the National Institute for Health Research or the Department of Health and Social Care.  
25  
26  
27  
28  
29  
30

## 31 **Competing interests**

32  
33 We have read and understood BMJ policy on declaration of interests and declare that we have  
34  
35 no competing interests.  
36  
37  
38  
39  
40  
41

## 42 **References**

- 43  
44 1. National Institute for Health and Care Excellence (2004). Improving supportive and  
45  
46 palliative care for adults with cancer. Cancer service guideline [CSG4].  
47  
48
- 49 2. Palliative and end of life care Priority Setting Partnership: Putting patients, carers and  
50  
51 clinicians at the heart of palliative and end of life care research. January 2015.  
52  
53

54 Available at:

55  
56 [https://www.mariecurie.org.uk/globalassets/media/documents/research/PeolcPSP\\_Fin](https://www.mariecurie.org.uk/globalassets/media/documents/research/PeolcPSP_Final_Report.pdf)  
57  
58 [al\\_Report.pdf](https://www.mariecurie.org.uk/globalassets/media/documents/research/PeolcPSP_Final_Report.pdf) (accessed 30/05/18)  
59  
60

- 1  
2  
3 3. Barker I, Steventon A, Deeny SR. Association between continuity of care in general  
4  
5  
6  
7  
8  
9  
10  
11  
12  
13  
14  
15  
16  
17  
18  
19  
20  
21  
22  
23  
24  
25  
26  
27  
28  
29  
30  
31  
32  
33  
34  
35  
36  
37  
38  
39  
40  
41  
42  
43  
44  
45  
46  
47  
48  
49  
50  
51  
52  
53  
54  
55  
56  
57  
58  
59  
60  
sectional study of routinely collected, person level data. *BMJ* 2017;356:j84
4. Schweitzer B, Blankenstein N, Deliens L, Van Der Horst H. Out-of-hours palliative  
care provided by GP co-operatives in the Netherlands: A focus group study. *European  
Journal of General Practice*, 2011; 17: 160–166.
5. Hall S, Murchie P, Campbell C and Murray SA. Introducing an electronic Palliative  
Care Summary (ePCS) in Scotland: patient, carer and professional perspectives.  
*Family Practice* 2012; 29:576–585.
6. Richards SH, Winder R, Seamark C, Seamark D, Avery S, Gilbert J, Barwick A and  
Campbell JL. 2011: The experiences and needs of people seeking palliative health  
care out-of-hours: a qualitative study. *Primary Health Care Research & Development*  
12(2), 165–78; available from: PM:21457601.
7. Leydon GM, Shergill NK, Campion-Smith C, et al. Discontinuity of care at end of  
life: a qualitative exploration of OOH end of life care. *BMJ Supportive & Palliative  
Care* 2013;3:412-421.
8. Purdy S, Lassetter G, Griffin T, Wye L. Impact of the Marie Curie Cancer Care  
Delivering Choice Programme in Somerset and North Somerset on place of death and  
hospital usage: a retrospective cohort study. *BMJ Supportive & Palliative Care*  
2014;0:1–6.
9. Asprey A, Richards SH, Wright C, Seamark C, Seamark D and Moxon J. Transferring  
information to an out-of-hours primary care service for patients with palliative care  
needs: an action research study to improve the use of handover forms. *Primary Health  
Care Research & Development* 2013; 14: 7–20.

- 1  
2  
3 10. Wye L, Lasseter G, Simmonds B, Duncan L, Percival J and Purdy S. Electronic  
4  
5 palliative care coordinating systems (EPaCCS) may not facilitate home deaths: A  
6  
7 mixed methods evaluation of end of life care in two English counties. *Journal of*  
8  
9 *Research in Nursing*, 2016, Vol. 21(2) 96–107
- 10  
11  
12 11. National Institute for Health and Clinical Excellence (2011) End of Life Care for  
13  
14 Adults. NICE Quality Standard [QS13]
- 15  
16  
17 12. Petrova M, Riley J, Abel J and Barclay S. Crash course in EPaCCS (Electronic  
18  
19 Palliative Care Coordination Systems): 8 years of successes and failures in patient  
20  
21 data sharing to learn from. *BMJ Supportive & Palliative Care* 2016;0:1–9.
- 22  
23  
24 13. Ali AA, Adam R, Taylor D, et al. Use of a structured palliative care summary in  
25  
26 patients with established cancer is associated with reduced hospital admissions by  
27  
28 out-of-hours general practitioners in Grampian. *BMJ Support Palliat Care* 2013;3:452–  
29  
30 5. doi:10.1136/bmjspcare-2012-000371
- 31  
32  
33 14. Turner V, Flemming K. Socioeconomic factors affecting access to preferred place of  
34  
35 death: A qualitative evidence synthesis. *Palliative medicine* 2019 Mar  
36  
37 8:0269216319835146.
- 38  
39  
40 15. Department of Health (2016) Our Commitment to you for end of life care: the  
41  
42 Government Response to the Review of Choice in End of Life Care. Available at:  
43  
44 [https://assets.publishing.service.gov.uk/government/uploads/system/uploads/attachme](https://assets.publishing.service.gov.uk/government/uploads/system/uploads/attachment_data/file/536326/choice-response.pdf)  
45  
46 [nt\\_data/file/536326/choice-response.pdf](https://assets.publishing.service.gov.uk/government/uploads/system/uploads/attachment_data/file/536326/choice-response.pdf) (accessed 21/03/19)
- 47  
48  
49 16. Office for National Statistics. National Survey of Bereaved People (VOICES):  
50  
51 England, 2015. Available at:  
52  
53 <https://www.ons.gov.uk/peoplepopulationandcommunity/healthandsocialcare/healthca>  
54  
55 [resystem/bulletins/nationalsurveyofbereavedpeoplevoices/england2015#preferences-](https://www.ons.gov.uk/peoplepopulationandcommunity/healthandsocialcare/healthca)  
56  
57 [and-choice-at-the-end-of-life](https://www.ons.gov.uk/peoplepopulationandcommunity/healthandsocialcare/healthca) (accessed 30/05/18)
- 58  
59  
60

- 1  
2  
3 17. Public Health England, End of Life Care Profiles. Available at:  
4  
5 <https://fingertips.phe.org.uk/profile/end-of-life> (accessed 30/05/18)  
6  
7  
8 18. Allsop MJ, Kite S, McDermott S, Penn N, Millares-Martin P and Bennett MI.  
9  
10 Electronic palliative care coordination systems: Devising and testing a methodology  
11  
12 for evaluating documentation, *Palliative Medicine* 2017 May; 31(5): 475–482.  
13  
14 19. Fallowfield L and Jenkins V. Communicating sad, bad, and difficult news in  
15  
16 medicine. *The Lancet*, 2004;363(9405), 312-319.  
17  
18 20. Gibbins J, McCoubrie R, and Forbes K. Why are newly qualified doctors unprepared  
19  
20 to care for patients at the end of life? *Medical education*;2011, 45(4), 389-399.  
21  
22 21. Whole Systems Partnership. (2016) *Independent evaluation of Electronic Palliative*  
23  
24 *Care Co-ordination Systems (EPaCCS) in England: Final Report*, March 2016  
25  
26 22. Wye L, Lasseter GM, Percival JF, Simmonds BAJ, Duncan LJ, Purdy S. Independent  
27  
28 Evaluation of the Marie Curie Cancer Care Delivering Choice Programme in  
29  
30 Somerset and North Somerset. Centre for Primary Health Care, Department of Social  
31  
32 and Community Medicine, The University of Bristol, 2012.  
33  
34 23. NHS Digital (2015). SCCI1580: Palliative Care Co-ordination: Core Content.  
35  
36 Available at: [https://digital.nhs.uk/data-and-information/information-](https://digital.nhs.uk/data-and-information/information-standards/information-standards-and-data-collections-including-extractions/publications-and-notifications/standards-and-collections/scci1580-palliative-care-co-ordination-core-content)  
37  
38 [standards/information-standards-and-data-collections-including-](https://digital.nhs.uk/data-and-information/information-standards/information-standards-and-data-collections-including-extractions/publications-and-notifications/standards-and-collections/scci1580-palliative-care-co-ordination-core-content)  
39  
40 [extractions/publications-and-notifications/standards-and-collections/scci1580-](https://digital.nhs.uk/data-and-information/information-standards/information-standards-and-data-collections-including-extractions/publications-and-notifications/standards-and-collections/scci1580-palliative-care-co-ordination-core-content)  
41  
42 [palliative-care-co-ordination-core-content](https://digital.nhs.uk/data-and-information/information-standards/information-standards-and-data-collections-including-extractions/publications-and-notifications/standards-and-collections/scci1580-palliative-care-co-ordination-core-content) (accessed 23/01/19)  
43  
44  
45  
46  
47  
48 24. Pawson R and Tilley N. Realistic Evaluation. London: Sage, 2005.  
49  
50 25. National End of Life Care Intelligence Network. (2014). *Electronic Palliative Care*  
51  
52 *Co-ordination Systems (EPaCCS) in England: Survey of clinical commissioning*  
53  
54 *groups (2013)*.  
55  
56  
57  
58 26. Pawson R. Evidence based policy: A realist perspective. London: Sage, 2006.  
59  
60

- 1  
2  
3 27. Greenhalgh T, Wong G, Jagosh J, et al Protocol—the RAMESES II study: developing  
4 guidance and reporting standards for realist evaluation BMJ Open 2015;5:e008567.  
5  
6 doi: 10.1136/bmjopen-2015-008567  
7  
8  
9  
10 28. Sturges JE, Hanrahan KJ. Comparing telephone and face-to-face qualitative  
11 interviewing: a research note. Qual Res. 2004 Apr;4(1):107-18.  
12  
13  
14 29. Jackson SF, Kolla G. A new realistic evaluation analysis method: linked coding of  
15 context, mechanism, and outcome relationships. American Journal of Evaluation.  
16  
17 2012 Sep;33(3):339-49.  
18  
19  
20  
21 30. Hanson WE, Creswell JW, Clark VL, Petska KS, Creswell JD. Mixed methods  
22 research designs in counseling psychology. Journal of counseling psychology. 2005  
23  
24 Apr;52(2):224.  
25  
26  
27  
28 31. Emmel N, Greenhalgh J, Manzano A, Monaghan M, Dalkin S (Eds). Doing realist  
29 research. London: Sage, 2018.  
30  
31  
32  
33  
34  
35  
36  
37  
38  
39  
40  
41  
42  
43  
44  
45  
46  
47  
48  
49  
50  
51  
52  
53  
54  
55  
56  
57  
58  
59  
60

**Figure 1 – Definition of Context, Mechanism and Outcome*****Context***

Something that existed prior to the introduction of the EPaCCS, for example cultural views and beliefs around talking about death and dying and Advanced Care Planning (ACP) conversations. Contexts might also refer to the setting, (e.g. primary or secondary care) or patient characteristics (e.g. underlying diagnosis, socio-demographics, mental capacity).

***Mechanism***

The intended or unintended resources created by an intervention and the response to those resources (cognitive, emotional, motivational etc) by Healthcare Professionals (HCPs), patients and carers. Mechanisms can pertain to why HCPs and patients choose (or choose not) to utilise the EPaCCS.

***Outcome***

An outcome will define the result of the EPaCCS whether intended (did the project succeed against the criteria it set itself at the outset), and also the unplanned and/or unexpected impacts.

Informed by (24) and (26).

# Figure 2 – Visual representation of the initial programme theory at a macro level

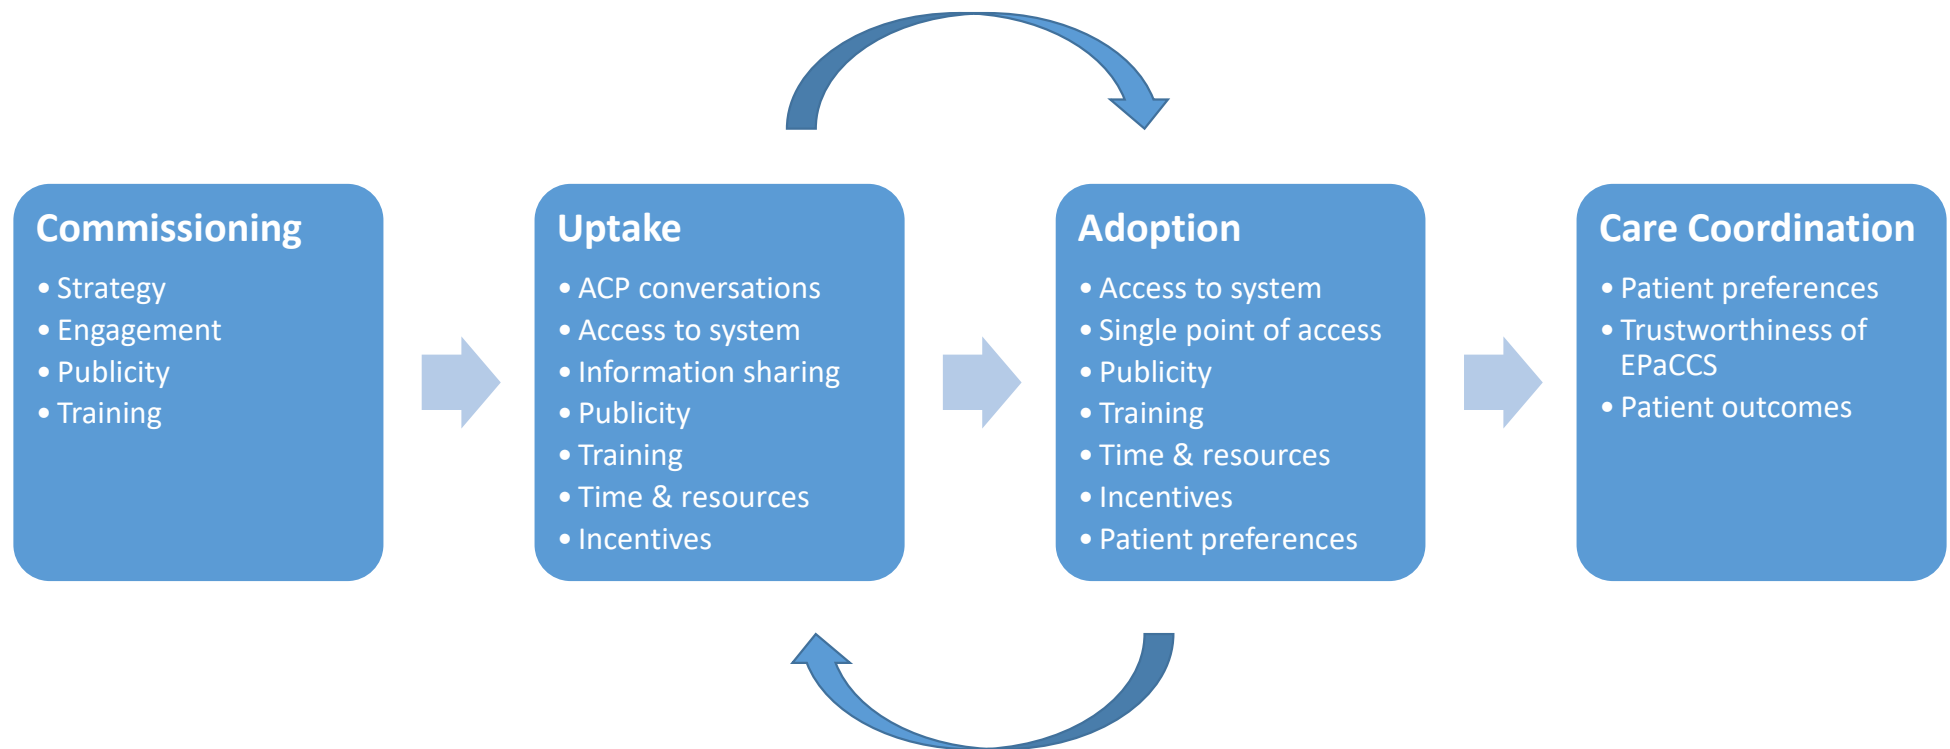

Supplement: bmjopen-2019-031153.draft_revisions.pdf [file bmjopen-2019-031153.draft_revisions.pdf]
